# Supplementary material
Source: PubMed Central journal article supplement (PMC2615203)
Supplement: NIHMS64149-supplement-2si20070725_10.pdf [file NIHMS64149-supplement-2si20070725_10.pdf]

# Supporting Information

## Construction of Bridged and Fused Ring Systems via Intramolecular Michael Reactions of Vinylnitroso Compounds

Ilia Korboukh, Praveen Kumar and Steven M. Weinreb\*

*Department of Chemistry, The Pennsylvania State University  
University Park, Pennsylvania 16802*

*E-mail: smw@chem.psu.edu*

### Table of Contents

|                                                                   |         |
|-------------------------------------------------------------------|---------|
| Title page                                                        | S1      |
| Experimental details of compounds <b>4-56</b>                     | S2-S36  |
| Crystal structure data of compound <b>9</b>                       | S37-S50 |
| ORTEP Diagram of X-ray Diffraction Structure of <b>9</b>          | S50     |
| NMR spectra of compounds <b>9, 10, 27, 36, 45, 54, 12, 13, 14</b> | S51-S66 |

**General Methods.** All non-aqueous reactions were carried out under an inert atmosphere of argon in flame-dried glassware. Air and moisture sensitive liquid reagents were added via a dry syringe or canula. All solvents and reagents were used as obtained from commercial sources without further purification. Flash column chromatography was performed using EM Science silica gel 60 (230-400 mesh). Analytical and preparative thin layer chromatography (TLC) were performed on EM Science silica gel 60 PF<sub>254</sub> plates. <sup>1</sup>H and <sup>13</sup>C NMR spectral data were recorded on Bruker DPX-300, CDPX-300, AMX-360, or DRX 400 MHz spectrometers. Infrared spectral data were obtained using a Perkin-Elmer 1600 FTIR spectrometer.

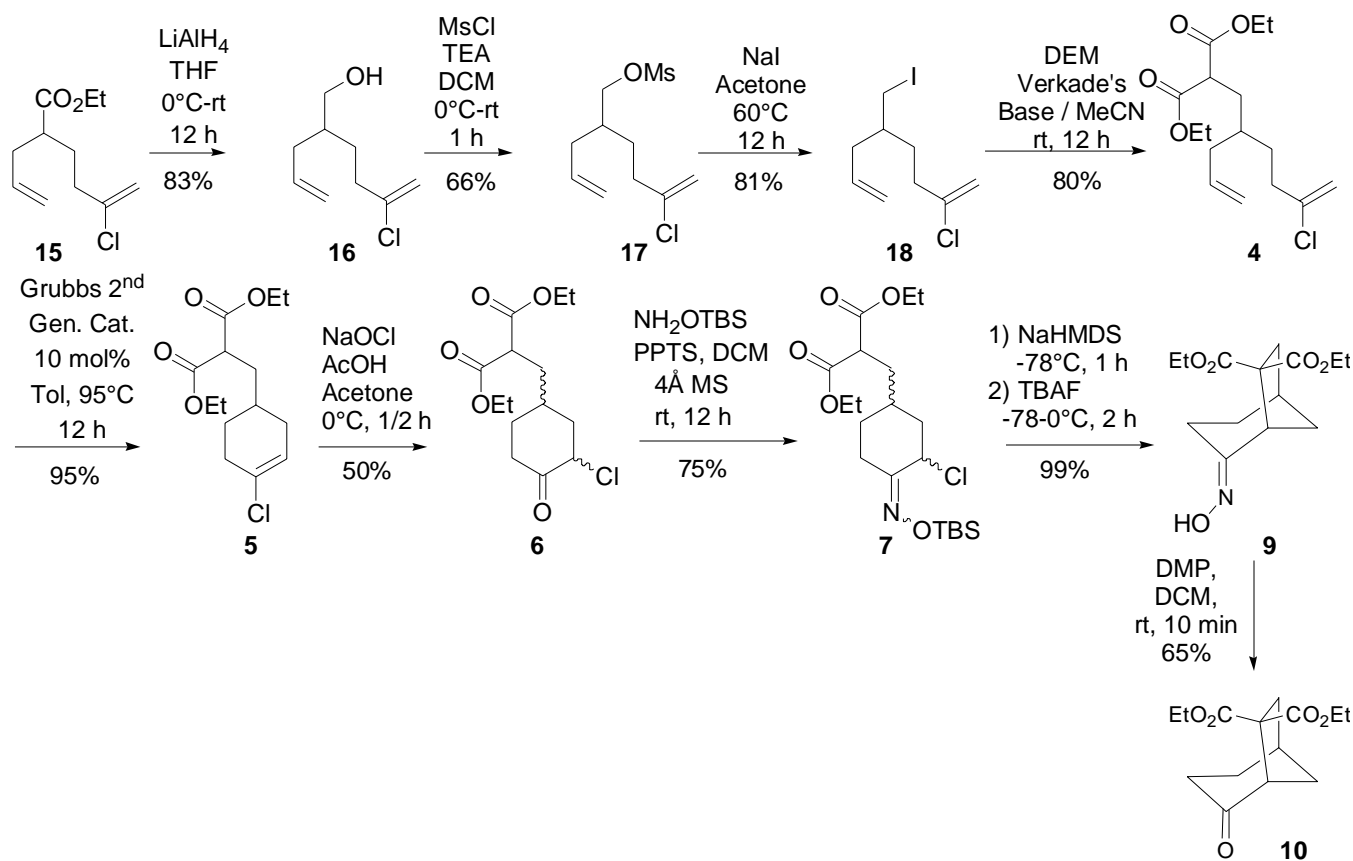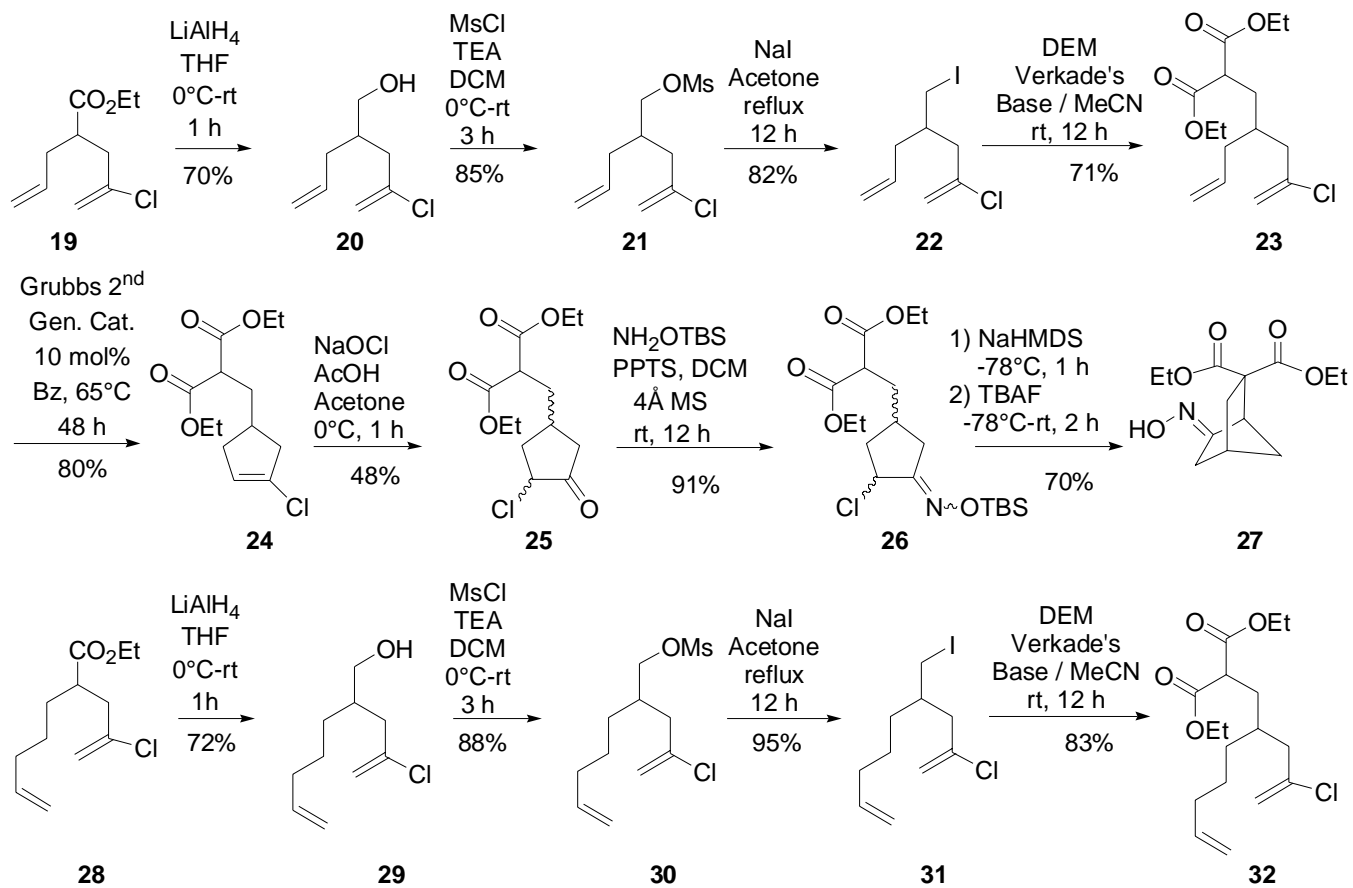

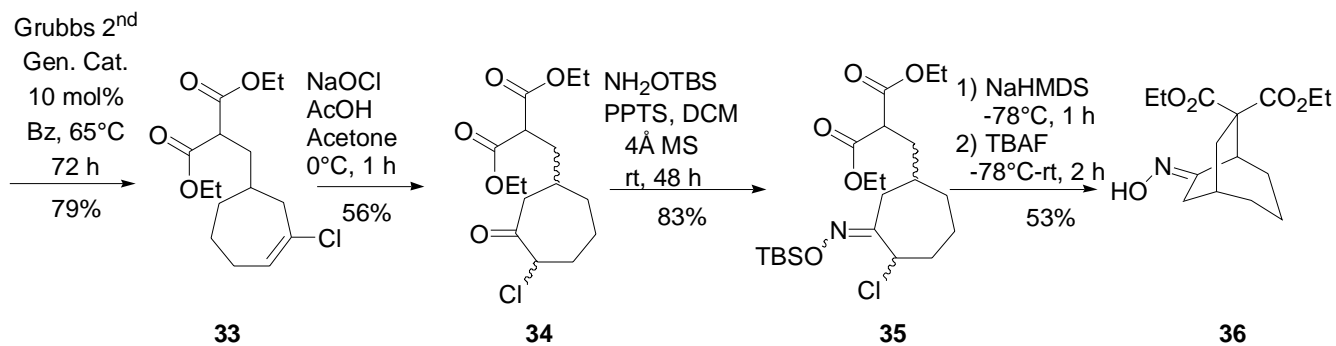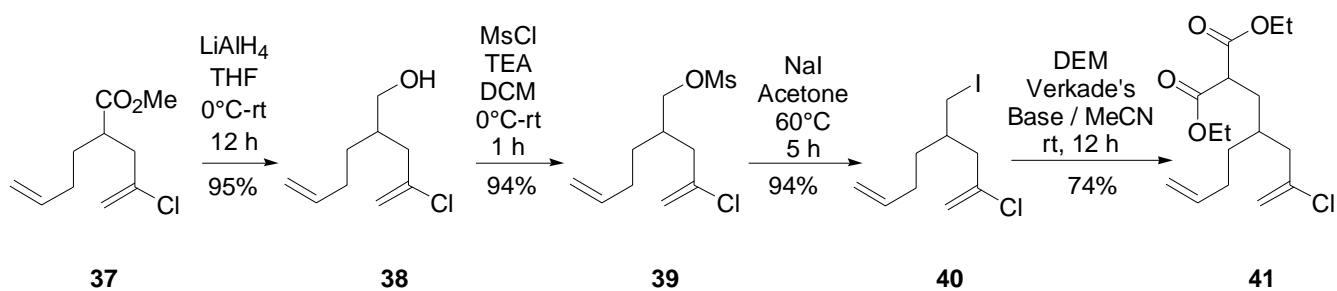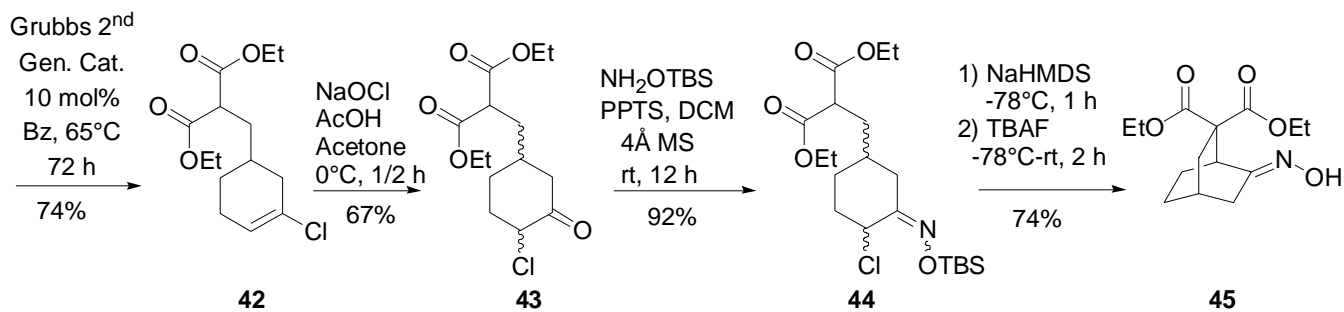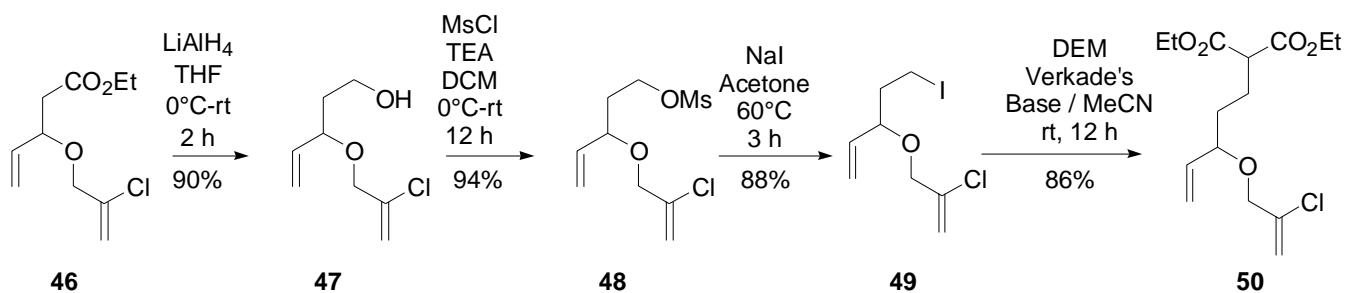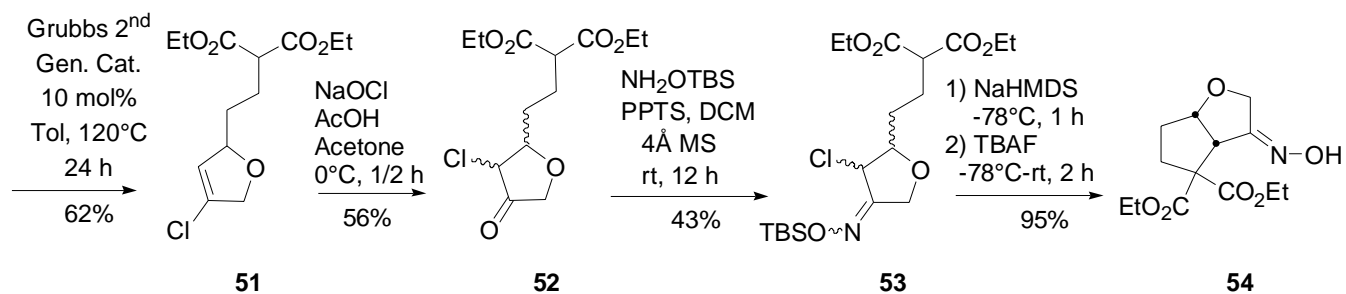

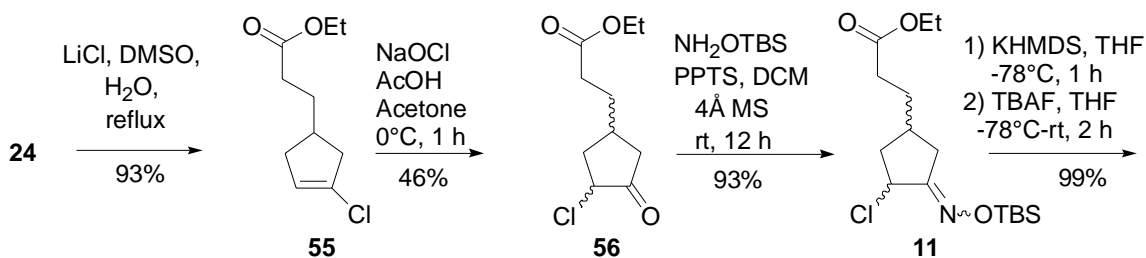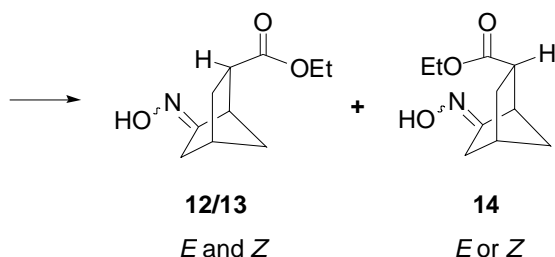

**2-Allyl-5-chlorohex-5-enoic Acid Ethyl Ester (15).** To a solution of 2-allyl-2-(3-chlorobut-3-enyl)-malonic acid diethyl ester (710 mg, 2.46 mmol) 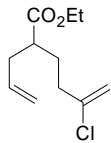 in DMSO (10 mL) were added LiCl (228 mg, 5.42 mmol) and water (0.4 mL). The mixture was heated in an oil bath at 190 °C for 12 h, and cooled to rt. Aqueous NH<sub>4</sub>OAc (10 mL) was added and the mixture was then extracted with ether (30 mL x 3). The organic layers were combined and dried over Na<sub>2</sub>SO<sub>4</sub>. The solvent was removed under reduced pressure, and the residue was purified by flash column chromatography on silica gel (5-10% ether/pentane gradient) to afford the title compound **15** as a clear oil (250 mg, 64%, 73% brsm). <sup>1</sup>H NMR (300 MHz, CDCl<sub>3</sub>) δ 5.78-5.64 (m, 1H), 5.14-4.99 (m, 4H), 4.12 (dd, *J* = 7.1, 14.2 Hz, 2H), 3.45 (dd, *J* = 7.0, 14.0 Hz, 1H), 2.45-2.20 (m, 5H), 1.84-1.57 (m, 2H), 1.25-1.16 (m, 3H); <sup>13</sup>C NMR (75 MHz, CDCl<sub>3</sub>) δ 175.3, 142.2, 135.4, 117.4, 113.1, 60.7, 44.4, 37.2, 36.8, 29.4, 14.7; HRMS-AP [M + H]<sup>+</sup> calcd for C<sub>11</sub>H<sub>18</sub>O<sub>2</sub>Cl, 217.1000; found, 217.0995.

**2-Allyl-5-chlorohex-5-en-1-ol (16).** To a suspension of LiAlH<sub>4</sub> (79 mg, 2.07 mmol) in THF (5 mL) at 0 °C was added dropwise ester **15** (250 mg, 1.15 mmol) in THF (5 mL). The mixture was stirred for 12 h at rt, and then diluted with EtOAc (20 mL). The mixture was poured into 1 M HCl solution (10 mL), and saturated aqueous NH<sub>4</sub>Cl (10 mL) and EtOAc (10 mL) were added. The organic layer was dried over MgSO<sub>4</sub>, and the solvent was removed under reduced pressure. The residue was purified by flash column chromatography (10-20% ether/pentane gradient) to afford the title compound **16** as a clear oil (166 mg, 83%). <sup>1</sup>H NMR (400 MHz, CDCl<sub>3</sub>) δ 5.82-5.73 (m, 1H), 5.18-5.06 (m, 4H), 4.18-3.96 (m, 2H), 3.50 (dd, *J* = 7.0, 14.0 Hz, 1H), 2.41 (t, *J* = 7.5 Hz, 2H), 2.17-2.07 (m, 2H), 1.88-1.76 (m, 1H), 1.67-1.59 (m, 2H); <sup>13</sup>C NMR (75 MHz, CDCl<sub>3</sub>) δ 135.9, 117.4, 112.7, 66.6, 36.8, 35.9, 28.8, 21.3, 14.4; HRMS-ES [M + Na]<sup>+</sup> calcd for C<sub>9</sub>H<sub>15</sub>ClO, 174.0811; found, 174.0815.

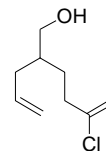

**Methanesulfonic Acid 2-Allyl-5-chlorohex-5-enyl Ester (17).** To a solution of alcohol **16** (166 g, 0.95 mmol) in dichloromethane (3.0 mL) at 0 °C was added portionwise triethylamine (0.13 mL, 0.87 mmol) and mesyl chloride (0.042 mL, 0.57 mmol). The mixture was stirred at 0 °C for 30 min, and then at rt for 30 min. The organic phase was diluted with dichloromethane (18 mL) and washed consecutively with brine (10 mL), 1 M aqueous KHSO<sub>4</sub> (10 mL), brine (10 mL), 5% aqueous NaHCO<sub>3</sub> (10 mL), brine (10 mL), and dried over Na<sub>2</sub>SO<sub>4</sub> overnight. The solvent was removed under reduced pressure and the residue was purified by flash column chromatography (10-20% EtOAc/hexanes gradient) to afford the title compound **17** as a

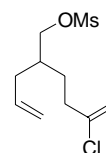

clear oil (159 mg, 66%).  $^1\text{H}$  NMR (300 MHz,  $\text{CDCl}_3$ )  $\delta$  5.81-5.73 (m, 1H), 5.20-5.10 (m, 4H), 4.21-4.15 (m, 2H), 3.03 (s, 3H), 2.43 (t,  $J = 7.5$  Hz, 2H), 2.19 (t,  $J = 6.0$  Hz, 2H), 1.94-1.86 (m, 1H), 1.73-1.63 (m, 2H);  $^{13}\text{C}$  NMR (75 MHz,  $\text{CDCl}_3$ )  $\delta$  142.4, 135.2, 118.2, 113.1, 71.6, 37.6, 36.9, 35.2, 30.1, 28.2; HRMS-ES  $[\text{M}+\text{Na}]^+$  calcd for  $\text{C}_{10}\text{H}_{17}\text{ClO}_3\text{SNa}$ , 275.0485; found, 275.0480.

**2-Chloro-5-iodomethylocta-1,7-diene (18).** To a solution of mesylate **17** (155 mg, 0.62 mmol) in acetone (5 mL) was added sodium iodide (369 mg, 2.96 mmol) and the mixture was stirred at  $60^\circ\text{C}$  for 12 h. The solvent was then removed under reduced pressure and the residue was purified by flash column chromatography (pentane) to afford the title compound **18** as a clear oil (140 mg, 81%).  $^1\text{H}$  NMR (300 MHz,  $\text{CDCl}_3$ )  $\delta$  5.79-5.65 (m, 1H), 5.19-4.91 (m, 4H), 3.27 (d,  $J = 3.7$  Hz, 2H), 2.41-2.34 (m, 2H), 2.19-2.06 (m, 2H), 1.68-1.61 (m, 1H), 1.35-1.22 (m, 2H);  $^{13}\text{C}$  NMR (75 MHz,  $\text{CDCl}_3$ )  $\delta$  142.6, 135.5, 117.9, 112.9, 38.7, 37.6, 36.6, 32.0, 15.0; HRMS-EI  $[\text{M}]^+$  calcd for  $\text{C}_9\text{H}_{14}\text{ClI}$ , 283.9829; found, 283.9841.

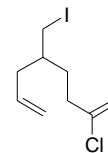

**2-(2-Allyl-5-chlorohex-5-enyl)-malonic Acid Diethyl Ester (4).** To a solution of iodide **18** (44 mg, 0.15 mmol) and diethyl malonate (26 mg, 0.16 mmol) in acetonitrile (5 mL) was added Verkade's base (37 mg, 0.17 mmol), and the reaction mixture was stirred at rt for 24 h. The solvent was removed under reduced pressure, and the residue was purified by flash column chromatography (5-20% ether/pentane gradient) to afford the title compound **4** as a clear oil (38 mg, 80%).  $^1\text{H}$  NMR (400 MHz,  $\text{CDCl}_3$ )  $\delta$  5.81-5.68 (m, 1H), 5.14-5.04 (m, 4H), 4.20 (q,  $J = 6.8$  Hz,

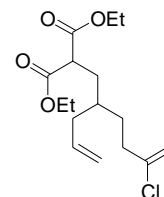

4H), 3.46 (t,  $J = 7.5$  Hz, 1H), 2.37 (t,  $J = 6.0$  Hz, 2H), 2.10-2.08 (m 3H), 1.89 (t,  $J = 6.0$  Hz, 2H), 1.63-1.39 (m, 3H), 1.27 (t,  $J = 7.5$  Hz, 6H);  $^{13}\text{C}$  NMR (75 MHz,  $\text{CDCl}_3$ )  $\delta$  169.9, 143.0, 135.9, 117.4, 112.5, 61.8, 50.2, 37.7, 36.5, 34.7, 32.7, 31.0, 14.5; HRMS-ES  $[\text{M} + \text{H}]^+$  calcd for  $\text{C}_{16}\text{H}_{26}\text{ClO}_4$ , 317.1520; found, 317.1512.

**2-(4-Chlorocyclohex-3-enylmethyl)-malonic Acid Diethyl Ester**

(5). A flame dried 50 mL two necked flask equipped with a condenser and a magnetic stirring bar was charged with ester 4 (48 mg, 0.15 mmol) and benzene (20 mL). The mixture was deaerated with argon for 1 h. Grubbs 2<sup>nd</sup> generation catalyst (12 mg, 0.02 mmol) in benzene (2 mL) was added *via* syringe. The combined mixture was deaerated with argon for another 20 min, and then heated at 65 °C for 12 h. The solvent was removed under reduced pressure, and the residue was purified by flash column chromatography (2-5% ether/pentane gradient) to afford the title compound 5 as a yellow oil (42 mg, 95%).  $^1\text{H}$  NMR (300 MHz,  $\text{CDCl}_3$ )  $\delta$  5.83-5.66 (m, 1H), 4.20 (dd,  $J = 7.0, 14.0$  Hz, 4H), 3.42 (t,  $J = 7.5$  Hz, 1H), 2.56-2.26 (m, 4H), 1.97-1.84 (m, 4H), 1.51-1.50 (m, 2H), 1.49-1.39 (m, 1H), (t,  $J = 6.0$  Hz, 6H);  $^{13}\text{C}$  NMR (75 MHz,  $\text{CDCl}_3$ )  $\delta$  169.8, 132.1, 123.6, 61.8, 50.1, 34.7, 32.7, 32.3, 30.8, 29.8, 14.4; HRMS-ES  $[\text{M} + \text{H}]^+$  calcd for  $\text{C}_{14}\text{H}_{22}\text{ClO}_4$ , 289.1207; found, 289.1202.

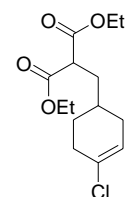

**2-(3-Chloro-4-oxocyclohexylmethyl)-malonic Acid Diethyl Ester**

Ester (6). To a solution of ester 5 (30 mg, 0.10 mmol), acetone (0.40 mL), and glacial acetic acid (0.17 mL) at 0 °C was added dropwise aqueous sodium hypochlorite (68  $\mu\text{L}$  of 10% solution, 0.10 mmol) *via* syringe. The reaction mixture was stirred at 0 °C for 30 min and quenched by addition of aqueous

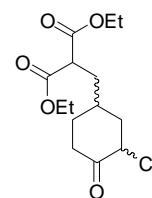



saturated Na<sub>2</sub>CO<sub>3</sub> solution. The mixture was then extracted with dichloromethane (20 mL x 2). The organic layers were combined, washed with brine (10 mL) and dried over Na<sub>2</sub>SO<sub>4</sub>. The solvent was removed under reduced pressure and the residue was purified by flash column chromatography (10% ether/pentane) to afford the title compound **6** as a yellow oil containing a 1:1 mixture of diastereomers (16 mg, 50%). <sup>1</sup>H NMR (400 MHz, CDCl<sub>3</sub>) δ 4.78 (0.2 H), 4.33-4.06 (m, 4.8H), 3.47-3.7 (m, 1H), 3.03-2.94 (m, 0.6H), 2.99-2.96 (m, 1H), 2.35-2.22 (m, 2H), 2.13-2.07 (m, 2H), 1.97-1.86 (m, 3H), 1.81-1.79 (m, 1H), 1.32-1.27 (m, 6H); <sup>13</sup>C NMR (75 MHz, CDCl<sub>3</sub>) δ 204.6, 169.7, 169.6, 169.5, 168.0, 62.1, 62.0, 59.8, 50.2, 50.0, 41.0, 37.2, 35.8, 34.2, 33.9, 32.6, 30.1, 29.1, 28.9, 22.4, 14.5; HRMS-ES [M + Na]<sup>+</sup> calcd for C<sub>14</sub>H<sub>21</sub>ClO<sub>5</sub>Na, 327.0975; found, 327.0984.

**2-(3-Chloro-4-*tert*-butyldimethylsilyloxyimino-**

**cyclohexylmethyl)-malonic Acid Diethyl Ester (7).** To a solution of α-chloroketone **6** (11 mg, 0.037 mmol) in dichloromethane (0.5 mL) were added *O*-(*t*-butyldimethylsilyl)-hydroxylamine (11 mg, 0.075 mmol), 4Å

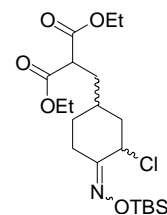

molecular sieves (crushed), and a catalytic amount of PPTS. The mixture was stirred at rt for 12 h, and then filtered through a pad of Celite. The solvent was removed under reduced pressure and the residue was purified by flash column chromatography (10-20% ether/pentane gradient) to afford the title compound **7** as a clear oil containing a complex mixture of stereoisomers (12 mg, 75%). <sup>1</sup>H NMR (300 MHz, CDCl<sub>3</sub>) δ 5.68 (brs, 0.4H), 5.14 (brs, 0.6H), 4.24 (q, *J* = 7.0 Hz, 4H), 3.45 (t, *J* = 7.7 Hz, 1H), 3.36-3.23 (m, 0.6H), 2.60-2.58 (m, 0.4H), 2.41-1.85 (m, 6H), 1.66-1.53 (m, 1H), 1.31 (t, *J* = 7.0, 6H), 0.91 (s,

9H), 0.18 (s, 6H); HRMS-ES  $[M + H]^+$  calcd for  $C_{20}H_{37}NClO_5Si$ , 434.2130; found, 434.2132.

#### 4-Hydroxyiminobicyclo[3.2.1]octane-6,6-dicarboxylic Acid Diethyl

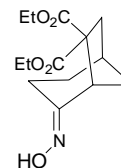

**Ester (9).** To a solution of oxime **7** (8 mg, 0.018 mmol) in THF (0.5 mL) at  $-78^\circ\text{C}$  was added dropwise NaHMDS (2 M in THF, 12  $\mu\text{L}$ , 0.025 mmol). After 1 h at  $-78^\circ\text{C}$ , TBAF (1 M in THF, 24  $\mu\text{L}$ , 0.024 mmol) was added and the reaction mixture was warmed to rt over 2 h. Saturated  $\text{NH}_4\text{Cl}$  was added and the mixture was extracted with EtOAc (10 mL x 2). The combined organic layers were dried over  $\text{MgSO}_4$ , and the solvent was removed under reduced pressure. The residue was purified by flash column chromatography (20% EtOAc/hexanes) to afford the title compound **9** as a white crystalline solid (5 mg, 99%) which was recrystallized from chloroform to afford colorless crystals suitable for X-ray analysis.  $^1\text{H}$  NMR (400 MHz,  $\text{CDCl}_3$ )  $\delta$  7.58 (brs, 1H), 4.23-4.14 (m, 4H), 3.49 (d,  $J = 4.4$  Hz, 1H), 3.03 (q,  $J = 8.0$  Hz, 1H), 2.6 (d,  $J = 14.5$  Hz, 1H), 2.44 (brs, 1H), 2.27 (q,  $J = 7.4$  Hz, 1H), 2.15-2.03 (m, 2H), 1.75-1.85 (m, 1H), 1.66-1.61 (m, 2H), 1.27-1.20 (m, 6H);  $^{13}\text{C}$  NMR (300 MHz,  $\text{CDCl}_3$ )  $\delta$  171.9, 170.2, 160.0, 63.4, 62.0, 61.9, 49.3, 38.3, 36.3, 34.3, 30.4, 18.3, 14.4, 14.3; HRMS-ES  $[M + H]^+$  calcd for  $C_{14}H_{22}NO_5$ , 284.1498; found, 284.1504.

#### 4-Oxobicyclo[3.2.1]octane-6,6-dicarboxylic Acid Diethyl Ester

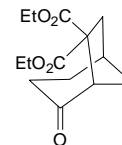

**(10).** To a solution of oxime **9** (23 mg, 0.084 mmol) in dichloromethane (0.5 mL) at rt was added DMP (20 mg, 0.088 mmol). After stirring the mixture for 10 min at rt, dichloromethane (10 mL) and aqueous  $\text{NaHSO}_4$  (10 mL) were added. The mixture was shaken for 5 min and extracted with dichloromethane (10 mL x 2). The

combined organic layers were dried over MgSO<sub>4</sub> and the solvent was removed under reduced pressure. The residue was purified by flash column chromatography (10% EtOAc/hexanes) to afford the title compound **10** as a clear oil (15 mg, 65%). <sup>1</sup>H NMR (400 MHz, CDCl<sub>3</sub>) δ 4.25-4.41 (m, 4H), 3.31 (d, *J* = 4.6 Hz, 1H), 2.75-2.67 (m, 1H), 2.65-2.55 (m, 1H), 2.49-2.44 (m, 1H), 2.43-2.34 (m, 2H), 2.28-2.23 (m, 1H), 1.92-1.89 (m, 1H), 1.80-1.76 (m, 1H), 1.29-1.22 (m, 6H); <sup>13</sup>C NMR (75 MHz, CDCl<sub>3</sub>) δ 209.5, 171.3, 170.5, 77.6, 62.8, 62.49, 62.45, 58.8, 38.3, 36.6, 35.9, 34.3, 32.0, 30.1, 14.39, 14.31.

**2-Allyl-4-chloro-4-enoic Acid Ethyl Ester (19).** To a stirred solution of LDA (2 M in THF, 1.2 mL, 2.4 mmol) and DMPU (0.67 mL) in 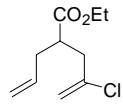 THF (5 mL) was added dropwise ethyl 4-pentenoate (256 mg, 2 mmol) in THF (1 mL) at -78 °C. The resulting mixture was stirred for 30 min at -78 °C and 2-chloro-3-iodopropene (486 mg, 2.4 mmol) was added. The reaction mixture was warmed to rt over 8 h. Saturated aqueous NH<sub>4</sub>Cl (10 mL) and ether (10 mL) were added. The organic layer was dried over Na<sub>2</sub>SO<sub>4</sub> and the solvent was removed under reduced pressure. The residue was purified by flash chromatography (10% ether/pentane) to afford the ester **19** as a colorless oil (309 mg, 76%). <sup>1</sup>H NMR (300 MHz, CDCl<sub>3</sub>) δ 5.73-5.59 (m, 1H), 5.13 (d, *J* = 1.2 Hz, 1H), 5.11 (d, *J* = 1.0 Hz, 1H), 5.05-4.96 (m, 2H), 4.06 (q, *J* = 7.1 Hz, 2H), 2.82-2.70 (m, 1H), 2.62 (dd, *J* = 8.3, 14.7 Hz, 1H), 2.38 (dd, *J* = 6.3, 14.5 Hz, 1H), 2.31-2.17 (m, 2H), 1.17 (t, *J* = 7.1 Hz, 3H); <sup>13</sup>C NMR (75 MHz, CDCl<sub>3</sub>) δ 174.4, 140.1, 134.8, 117.8, 114.6, 60.8, 43.1, 41.0, 35.8, 14.6; HRMS-AP [M + H]<sup>+</sup> calcd for C<sub>10</sub>H<sub>16</sub>ClO<sub>2</sub>, 203.0839; found, 203.0835.

**2-Allyl-4-chloropent-4-en-1-ol (20).** To a stirred suspension of 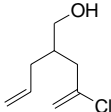 LiAlH<sub>4</sub> (84 mg, 2.21 mmol) in THF (5 mL) at 0 °C was added dropwise ester **19** (250 mg, 1.23 mmol) in ether (5 mL). The mixture was stirred for 1 h at rt, and then diluted with ethyl acetate (10 mL). The mixture was poured into 1 M HCl solution. Saturated aqueous NH<sub>4</sub>Cl (10 mL) and EtOAc (10 mL) were then added. The organic layer was dried over Na<sub>2</sub>SO<sub>4</sub> and the solvent was removed under reduced pressure. The residue was purified by flash column chromatography (30% ether/pentane) to afford the alcohol **20** as a colorless oil (140 mg, 70%). <sup>1</sup>H NMR (300 MHz, CDCl<sub>3</sub>) δ 5.81-5.67 (m, 1H), 5.15 (d, *J* = 1.1 Hz, 1H), 5.10 (d, *J* = 1.0 Hz, 1H), 5.05-4.97 (m, 2H), 3.53 (d, *J* = 4.8 Hz, 2H), 2.36 (dd, *J* = 7.4, 14.4 Hz, 1H), 2.25 (dd, *J* = 6.7, 14.4 Hz, 1H), 2.10-2.05 (m, 2H), 2.01-1.90 (m, 1H), 1.47 (br s, 1H); <sup>13</sup>C NMR (75 MHz, CDCl<sub>3</sub>) δ 140.0, 134.9, 115.6, 112.7, 62.9, 39.3, 36.5, 33.6; HRMS-EI [*M*]<sup>+</sup> calcd for C<sub>8</sub>H<sub>13</sub>ClO, 160.0655; found, 160.0654.

**Methanesulfonic Acid 2-Allyl-4-chloropent-4-enyl Ester (21).** To a stirred solution of alcohol **20** (132 mg, 0.82 mmol) in dichloromethane (5 mL) 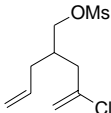 at 0 °C was added portionwise triethylamine (0.36 mL, 2.46 mmol) and mesyl chloride (0.20 mL, 2.46 mmol). The mixture was stirred at 0 °C for 30 min, and then at rt for 3 h. The organic phase was diluted with dichloromethane (10 mL) and washed consecutively with brine (10 mL), 1 M aqueous KHSO<sub>4</sub> (10 mL), brine (10 mL), 5% aqueous NaHCO<sub>3</sub> (10 mL), brine (10 mL), and dried over Na<sub>2</sub>SO<sub>4</sub>. The solvent was removed under reduced pressure and the residue was purified by flash column chromatography (30% ether/pentane) affording the mesylate **21** as a clear oil (166 mg, 85%). <sup>1</sup>H NMR (300 MHz, CDCl<sub>3</sub>) δ 5.76-5.62 (m, 1H), 5.20 (d, *J* = 1.2 Hz, 1H), 5.16 (d, *J* = 1.0 Hz, 1H),

5.07-5.01 (m, 2H), 4.11 (d,  $J = 4.4$  Hz, 2H), 2.93 (s, 3H), 2.43-2.29 (m, 2H), 2.23-2.09 (m, 3H);  $^{13}\text{C}$  NMR (75 MHz,  $\text{CDCl}_3$ )  $\delta$  140.1, 135.0, 118.5, 115.4, 70.8, 40.5, 37.5, 35.5, 34.6; LRMS-ES  $[\text{M} + \text{Na}]^+$  calcd for  $\text{C}_9\text{H}_{15}\text{ClNaO}_3\text{S}$ , 261.0; found, 261.0.

**2-Chloro-4-iodomethylhepta-1,6-diene (22).** To a solution of mesylate **21** (156 mg, 0.65 mmol) in acetone (5 mL) was added sodium iodide (491 mg, 3.25 mmol), and the mixture was stirred at reflux for 12 h. The solvent was removed under reduced pressure and the residue was purified by flash column chromatography (pentane) to produce the iodide **22** as a clear oil (145 mg, 82%).  $^1\text{H}$  NMR (300 MHz,  $\text{CDCl}_3$ )  $\delta$  5.71-5.58 (m, 1H), 5.21 (d,  $J = 1.2$  Hz, 1H), 5.19 (d,  $J = 1.0$  Hz, 1H), 5.13-5.02 (m, 2H), 3.21 (dq,  $J = 3.9, 7.6$  Hz, 2H), 2.29-2.26 (m, 2H), 2.09-1.97 (m, 2H), 1.57-1.50 (m, 1H);  $^{13}\text{C}$  NMR (75 MHz,  $\text{CDCl}_3$ )  $\delta$  140.3, 135.3, 118.2, 115.3, 44.1, 38.3, 35.4, 15.0; HRMS-EI  $[\text{M}]^+$  calcd for  $\text{C}_8\text{H}_{12}\text{ClI}$ , 269.9672; found, 269.9669.

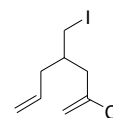

**2-(2-Allyl-4-chloropent-4-enyl)-malonic Acid Diethyl Ester (23).** To a stirred solution of diethyl malonate (90 mg, 0.56 mmol) in acetonitrile (3 mL) was added Verkade's base (122 mg, 0.56 mmol), and the mixture was stirred for 30 min at rt. Iodide **22** (138 mg, 0.51 mmol) was then added and the mixture was stirred for 12 h at rt. The solvent was removed under reduced pressure, and the residue was purified by flash column chromatography (20% ether/hexanes) to afford the diene **23** as a colorless oil (109 mg, 71%).  $^1\text{H}$  NMR (300 MHz,  $\text{CDCl}_3$ )  $\delta$  5.73-5.60 (m, 1H), 5.15 (d,  $J = 1.2$  Hz, 1H), 5.09 (d,  $J = 1.0$  Hz, 1H), 5.02-4.95 (m, 2H), 4.12 (dq,  $J = 1.9, 7.1$  Hz, 4H), 3.40 (t,  $J = 7.8$  Hz, 1H), 2.27 (dd,  $J = 6.1, 14.3$  Hz, 1H), 2.17 (dd,  $J =$

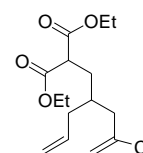

5.6, 14.3 Hz, 1H), 2.06-2.01 (m, 2H), 1.88-1.77 (m, 3H), 1.20 (dt,  $J = 1.0, 7.1$  Hz, 6H);  $^{13}\text{C}$  NMR (75 MHz,  $\text{CDCl}_3$ )  $\delta$  169.8, 169.7, 141.2, 135.4, 117.9, 114.6, 61.8, 50.2, 43.7, 37.1, 33.2, 32.2, 14.4; HRMS-ES  $[\text{M} + \text{H}]^+$  calcd for  $\text{C}_{15}\text{H}_{24}\text{ClO}_4$ , 303.1363; found, 303.1360.

**2-(3-Chlorocyclopent-3-enylmethyl)-malonic Acid Diethyl Ester**

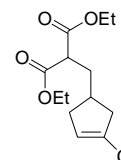

(**24**). A flame dried 250 mL two necked flask equipped with a magnetic stirring bar and a condenser was charged with diene **23** (106 mg, 0.35 mmol) and benzene (100 mL). The solution was deaerated by bubbling argon through the mixture for 2 h. The second-generation Grubbs catalyst (30 mg, 0.035 mmol) in 2 mL of benzene was added and the argon bubbling was continued for an additional 30 min. The mixture was heated and stirred at 65 °C for 2-3 days until TLC showed the reaction was complete. The solvent was removed under reduced pressure and the residue was purified by flash column chromatography (20% ether/hexanes) to afford the vinyl chloride **24** as a pale yellow oil (77 mg, 80%).  $^1\text{H}$  NMR (300 MHz,  $\text{CDCl}_3$ )  $\delta$  5.53-5.50 (m, 1H), 4.13 (dq,  $J = 3.7, 7.2$  Hz, 4H), 3.27 (t,  $J = 7.6$  Hz, 1H), 2.60-2.42 (m, 2H), 2.34-2.30 (m, 1H), 2.21-2.15 (m, 1H), 2.02-1.93 (m, 3H), 1.19 (t,  $J = 7.1$  Hz, 6H);  $^{13}\text{C}$  NMR (75 MHz,  $\text{CDCl}_3$ )  $\delta$  168.6, 168.6, 130.4, 124.7, 60.8, 50.0, 42.5, 36.8, 34.8, 34.2, 13.4; HRMS-ES  $[\text{M} + \text{H}]^+$  calcd for  $\text{C}_{13}\text{H}_{20}\text{ClO}_4$ , 275.1050; found, 275.1052.

**2-(3-Chloro-4-oxocyclopentylmethyl)-malonic Acid Diethyl Ester**

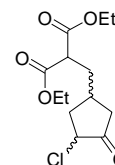

(**25**). To a solution of vinyl chloride **24** (60 mg, 0.22 mmol), acetone (2.5 mL) and glacial acetic acid (1 mL) at 0 °C was added dropwise sodium hypochlorite (0.16 mL of 10% solution, 0.22 mmol) via syringe. The reaction mixture

was stirred at 0 °C for 1 h and quenched by addition of saturated aqueous NaHCO<sub>3</sub> solution. The mixture was then extracted with dichloromethane (10 mL x 2). The combined organic layers were washed with brine (10 mL) and dried over Na<sub>2</sub>SO<sub>4</sub>. The solvent was removed under reduced pressure and the residue was purified by flash column chromatography (50% ether/hexanes) affording the  $\alpha$ -chloroketone **25** as a clear oil (30 mg, 48%). <sup>1</sup>H NMR (300 MHz, CDCl<sub>3</sub>)  $\delta$  4.13 (dq, *J* = 1.1, 7.1 Hz, 4H), 4.10-4.06 (m, 1H), 3.31 (t, *J* = 7.6 Hz, 1H), 2.64-2.43 (m, 2H), 2.33-2.24 (m, 1H), 2.08-1.99 (m, 2H), 1.97-1.79 (m, 2H), 1.21 (t, *J* = 7.1 Hz, 6H); <sup>13</sup>C NMR (75 MHz, CDCl<sub>3</sub>)  $\delta$  209.7, 169.3, 169.3, 62.1, 57.5, 50.8, 42.3, 39.9, 34.2, 32.2, 14.4; HRMS-AP [*M* + *H*]<sup>+</sup> calcd for C<sub>13</sub>H<sub>20</sub>ClO<sub>5</sub>, 291.0999; found, 291.0992.

**2-(3-Chloro-4-*tert*-butyldimethylsilyloxyimino-**  
**cyclopentylmethyl)-malonic Acid Diethyl Ester (26).** To a solution of  $\alpha$ -chloroketone **25** (23 mg, 0.079 mmol) in dichloromethane (3 mL) were added *O*-(*tert*-butyldimethylsilyl)-hydroxylamine (24 mg, 0.16 mmol), 4Å molecular sieves (crushed), and a catalytic amount of PPTS. The mixture was stirred at rt for 12 h and then filtered through a pad of Celite. The solvent was removed under reduced pressure and the residue was purified by flash column chromatography (20% ether/hexanes) to afford the  $\alpha$ -chloroketoxime **26** as a complex mixture of stereoisomers (colorless oil, 31 mg, 91%). <sup>1</sup>H NMR (300 MHz, CDCl<sub>3</sub>)  $\delta$  4.80 (d, *J* = 5.7 Hz, 1H, *minor*), 4.62 (d, *J* = 5.1 Hz, 1H, *major*), 4.04 (q, *J* = 7.2 Hz, 4H, *major and minor*), 3.21 (t, *J* = 7.6 Hz, 1H, *major and minor*), 2.75-2.60 (m, 1H, *major and minor*), 2.38-2.25 (m, 1H, *major and minor*), 2.10-2.04 (m, 1H, *major and minor*), 1.90-1.79 (m, 3H, *major and*

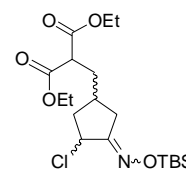

minor), 1.60-1.50 (m, 1H, *major and minor*), 1.11 (t,  $J = 7.2$  Hz, 6H, *major and minor*), 0.76 (s, 9H, *minor*), 0.74 (s, 9H, *major*), 0.00 (s, 6H, *major*), -0.01 (s, 6H, *minor*); HRMS-ES  $[M + H]^+$  calcd for  $C_{19}H_{35}ClNO_5Si$ , 420.1973; found, 420.1955.

### 6-Hydroxyiminobicyclo[2.2.1]heptane-2,2-dicarboxylic Acid

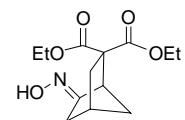

**Diethyl Ester (27).** To a stirred solution of oxime **26** (14.0 mg, 0.033 mmol) in THF (2 mL) at  $-78$  °C was added dropwise NaHMDS (1M in THF, 0.033 mL, 0.033 mmol) via syringe, and the reaction mixture was stirred at  $-78$  °C for 1 h. TBAF (1 M in THF, 0.049 mL, 0.049 mmol) was then added dropwise via syringe, and the mixture was warmed to rt over 2 h. Saturated aqueous  $NH_4Cl$  (5 mL) was then added. The mixture was extracted with ether (10 mL x 3), and the combined extracts were dried over  $Na_2SO_4$ . The solvent was removed under reduced pressure and the residue was purified by flash column chromatography (50% ether/pentane) to afford the bridged bicyclic oxime **27** as a clear oil (6.3 mg, 70%).  $^1H$  NMR (300 MHz,  $CDCl_3$ )  $\delta$  7.40 (s, 1H), 4.18-3.98 (m, 4H), 3.37 (d,  $J = 0.9$  Hz, 1H), 2.49 (d,  $J = 1.4$  Hz, 1H), 2.37-2.20 (m, 2H), 2.11 (dd,  $J = 3.4, 17.6$  Hz, 1H), 1.87 (m, 1H), 1.73 (m, 1H), 1.58 (m, 1H), 1.19-1.14 (m, 6H);  $^{13}C$  NMR (75 MHz,  $CDCl_3$ )  $\delta$  171.4, 170.3, 163.2, 62.2, 61.8, 60.3, 49.7, 40.2, 37.6, 35.3, 33.7, 14.4, 14.3; HRMS-ES  $[M + H]^+$  calcd for  $C_{13}H_{20}NO_5$ , 270.1341; found, 270.1354.

**2-(2-Chloroallyl)-hept-6-enoic Acid Ethyl Ester (28).** To a stirred solution of LDA (2 M in THF, 9 mL, 18 mmol) and DMPU (4 mL) in THF (50 mL) was added dropwise ethyl 6-heptenoate (1.87 g, 12 mmol) in THF (5 mL) at  $-78$

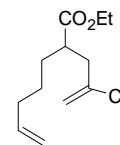



°C. The resulting mixture was stirred for 45 min at  $-78$  °C and 2-chloro-3-iodopropene (3.17 g, 15.6 mmol) was added. The reaction mixture was warmed to rt over 8 h. Saturated aqueous  $\text{NH}_4\text{Cl}$  (50 mL) and ether (50 mL) were added. The organic layer was dried over  $\text{Na}_2\text{SO}_4$  and the solvent was removed under reduced pressure. The residue was purified by flash chromatography (5% EtOAc/hexanes) to afford the ester **28** as a colorless oil (1.95 g, 71%).  $^1\text{H-NMR}$  (300 MHz,  $\text{CDCl}_3$ )  $\delta$  5.77-5.63 (m, 1H), 5.12 (d,  $J = 1.2$  Hz, 1H), 5.10 (d,  $J = 1.0$  Hz, 1H), 4.97-4.86 (m, 2H), 4.08 (q,  $J = 7.1$  Hz, 2H), 2.71-2.58 (m, 2H), 2.38-2.32 (m, 1H), 1.99 (dq,  $J = 1.4, 7.3$  Hz, 2H), 1.58-1.43 (m, 2H), 1.41-1.27 (m, 2H), 1.18 (t,  $J = 7.1$  Hz, 3H);  $^{13}\text{C-NMR}$  (75 MHz,  $\text{CDCl}_3$ )  $\delta$  175.3, 140.3, 138.6, 115.2, 114.5, 60.8, 43.5, 42.0, 33.8, 31.4, 26.6, 14.6; HRMS-AP  $[\text{M} + \text{H}]^+$  calcd for  $\text{C}_{12}\text{H}_{20}\text{ClO}_2$ , 231.1152; found, 231.1151.

**2-(2-Chloroallyl)-hept-6-en-1-ol (29).** To a stirred suspension of  $\text{LiAlH}_4$  (1.05 g, 27.9 mmol) in THF (50 mL) was added dropwise ester **28** (3.58 g, 15.5 mmol) in ether (25 mL) at 0 °C. The mixture was stirred for 1 h at rt, and then diluted with ethyl acetate (15 mL). The mixture was poured into 1 M HCl solution. Saturated aqueous  $\text{NH}_4\text{Cl}$  (20 mL) and EtOAc (20 mL) were then added. The organic layer was dried over  $\text{Na}_2\text{SO}_4$  and the solvent was removed under reduced pressure. The residue was purified by flash column chromatography (25% ether/pentane) to afford the alcohol **29** as a colorless oil (2.11 g, 72%).  $^1\text{H NMR}$  (300 MHz,  $\text{CDCl}_3$ )  $\delta$  5.87-5.73 (m, 1H), 5.20 (d,  $J = 1.1$  Hz, 1H), 5.16 (d,  $J = 1.0$  Hz, 1H), 5.04-4.92 (m, 2H), 3.57 (br s, 2H), 2.46 (dd,  $J = 0.6, 7.3$  Hz, 1H), 2.34 (s, 1H), 2.28 (dd,  $J = 0.6, 6.8$  Hz, 1H), 2.09-2.02 (m, 2H), 1.92-1.85 (m, 1H), 1.49-1.30 (m, 4H);  $^{13}\text{C NMR}$  (75 MHz,

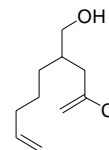

CDCl<sub>3</sub>)  $\delta$  142.0, 139.0, 115.0, 114.1, 64.7, 41.5, 38.4, 34.3, 30.1, 26.5; HRMS-EI [M]<sup>+</sup> calcd for C<sub>10</sub>H<sub>17</sub>ClO, 188.0968; found, 188.0959.

**Methanesulfonic Acid 2-(2-Chloroallyl)-hept-6-enyl Ester (30).** To a solution of alcohol **29** (30 mg, 0.15 mmol) in dichloromethane (3 mL) at 0 °C was added portionwise triethylamine (0.065 mL, 0.45 mmol) and mesyl chloride (0.037 mL, 0.45 mmol). The mixture was stirred at 0 °C for 30 min, and then at rt for 3 h. The organic phase was diluted with dichloromethane (10 mL) and washed consecutively with brine (10 mL), 1 M aqueous KHSO<sub>4</sub> (10 mL), brine (10 mL), 5% aqueous NaHCO<sub>3</sub> (10 mL), brine (10 mL), and dried over Na<sub>2</sub>SO<sub>4</sub>. The solvent was removed under reduced pressure and the residue was purified by flash column chromatography (30% ether/pentane) affording the mesylate **30** as a clear oil (37 mg, 88%). <sup>1</sup>H NMR (300 MHz, CDCl<sub>3</sub>)  $\delta$  5.78-5.65 (m, 1H), 5.19 (d, *J* = 1.2 Hz, 1H), 5.15 (d, *J* = 1.0 Hz, 1H), 4.98-4.87 (m, 2H), 4.11 (d, *J* = 4.5 Hz, 2H), 2.93 (s, 3H), 2.42-2.26 (m, 2H), 2.09-1.97 (m, 3H), 1.43-1.32 (m, 4H); <sup>13</sup>C NMR (75 MHz, CDCl<sub>3</sub>)  $\delta$  140.4, 138.6, 115.4, 115.3, 71.1, 41.1, 37.6, 35.8, 34.0, 29.9, 26.2; LRMS-ES [M + Na]<sup>+</sup> calcd for C<sub>11</sub>H<sub>19</sub>ClNaO<sub>3</sub>S, 289.1; found, 289.1.

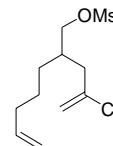

**2-Chloro-4-iodomethylnona-1,8-diene (31).** To a stirred solution of mesylate **30** (2.00 g, 7.49 mmol) in acetone (20 mL) was added sodium iodide (5.62 g, 37.45 mmol) and the mixture was stirred at reflux for 12 h. The solvent was then removed under reduced pressure and the residue was purified by flash column chromatography (pentane) to produce the iodide **31** as a clear oil (2.12 g, 95%). <sup>1</sup>H NMR

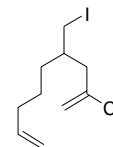

(300 MHz, CDCl<sub>3</sub>) δ 5.79-5.66 (m, 1H), 5.19 (d, *J* = 0.7 Hz, 1H), 5.17 (d, *J* = 1.0 Hz, 1H), 4.98-4.87 (m, 2H), 3.21 (dq, *J* = 3.7, 10.1 Hz, 2H), 2.31-2.17 (m, 2H), 2.01 (q, *J* = 6.8 Hz, 2H), 1.43-1.18 (m, 5H); <sup>13</sup>C-NMR (75 MHz, CDCl<sub>3</sub>) δ 140.5, 138.7, 115.3, 115.2, 44.7, 35.4, 34.0, 33.7, 26.1, 15.8; HRMS-EI [M]<sup>+</sup> calcd for C<sub>10</sub>H<sub>16</sub>ClI, 297.9985; found, 297.9987.

### 2-[2-(2-Chloroallyl)-hept-6-enyl]-malonic Acid Diethyl Ester

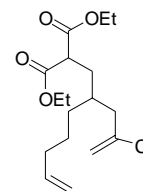

(**32**). To a stirred solution of diethyl malonate (0.59 g, 3.69 mmol) in acetonitrile (50 mL) was added Verkade's base (0.8 g, 3.69 mmol) and the mixture was stirred for 30 min at rt. Iodide **31** (1.00 g, 3.35 mmol) was then added and the resulting solution was stirred at rt for 12 h. The solvent was removed under reduced pressure, and the residue was purified by flash column chromatography (15% ether/hexanes) to afford the diene **32** as a colorless oil (0.92 g, 83%). <sup>1</sup>H NMR (300 MHz, CDCl<sub>3</sub>) δ 5.78-5.64 (m, 1H), 5.13 (d, *J* = 1.1 Hz, 1H), 5.08 (d, *J* = 0.9 Hz, 1H), 4.96-4.84 (m, 2H), 4.12 (q, *J* = 7.1 Hz, 4H), 3.37 (t, *J* = 7.5 Hz, 1H), 2.27-2.14 (m, 2H), 1.96 (q, *J* = 6.9 Hz, 2H), 1.82 (t, *J* = 7.1 Hz, 2H), 1.74-1.63 (m, 1H), 1.40-1.24 (m, 4H), 1.19 (t, *J* = 7.1 Hz, 6H); <sup>13</sup>C NMR (75 MHz, CDCl<sub>3</sub>) δ 169.8, 169.7, 141.5, 138.9, 115.0, 114.3, 61.8, 50.2, 44.1, 34.1, 33.4, 32.6, 32.4, 25.6, 14.4; HRMS-ES [M + H]<sup>+</sup> calcd for C<sub>17</sub>H<sub>28</sub>ClO<sub>4</sub>, 331.1676; found, 331.1674.

### 2-(3-Chlorocyclohept-3-enylmethyl)-malonic Acid Diethyl Ester

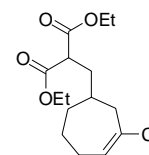

(**33**). A flame dried 250 mL two necked flask equipped with a magnetic stirring bar and a condenser was charged with diene **32** (250 mg, 0.76 mmol)

and benzene (200 mL). The resulting solution was deaerated by bubbling argon through the mixture for 2 h. The second-generation Grubbs catalyst (66 mg, 0.076 mmol) in 2 mL of benzene was added and the argon bubbling was continued for an additional 30 min. The mixture was heated and stirred at 65 °C for 6-7 days until TLC showed the reaction was complete. The solvent was removed under reduced pressure and the residue was purified by flash column chromatography (10% EtOAc/hexanes) to afford the vinyl chloride **33** as a yellow oil (180 mg, 79%). <sup>1</sup>H NMR (300 MHz, CDCl<sub>3</sub>) δ 5.89 (t, *J* = 6.5 Hz, 1H), 4.12 (dq, *J* = 1.9, 7.0 Hz, 4H), 3.37 (t, *J* = 7.7 Hz, 1H), 2.44-2.42 (m, 2H), 2.04-1.95 (m, 2H), 1.84-1.78 (m, 3H), 1.65-1.57 (m, 2H), 1.45-1.32 (m, 2H), 1.21 (dt, *J* = 0.9, 7.1 Hz, 6H); <sup>13</sup>C NMR (75 MHz, CDCl<sub>3</sub>) δ 169.9, 169.8, 133.9, 129.6, 61.8, 50.2, 43.2, 37.0, 34.9, 34.0, 27.9, 24.8, 14.4; HRMS-ES [M + H]<sup>+</sup> calcd for C<sub>15</sub>H<sub>24</sub>ClO<sub>4</sub>, 303.1363; found, 303.1358.

**2-(4-Chloro-3-oxocycloheptylmethyl)-malonic Acid Diethyl Ester**

**(34).** To a stirred solution of vinyl chloride **33** (94 mg, 0.31 mmol) in acetone (5 mL) and glacial acetic acid (2 mL) at 0 °C was added dropwise sodium hypochlorite (0.23 mL of 10% solution, 0.31 mmol) via syringe. The reaction mixture was stirred at 0 °C for 1 h and quenched by addition of saturated aqueous NaHCO<sub>3</sub> solution. The mixture was then extracted with dichloromethane (10 mL x 2). The combined organic layers were washed with brine (10 mL) and dried over Na<sub>2</sub>SO<sub>4</sub>. The solvent was removed under reduced pressure and the residue was purified by flash column chromatography (50% ether/hexanes) affording the α-chloroketone **34** as a clear oil (56 mg, 56%). <sup>1</sup>H NMR (300 MHz, CDCl<sub>3</sub>, 2:1 diastereomeric mixture) δ 4.26 (t, *J* =

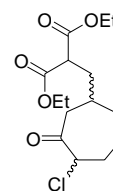

4.8 Hz, 1H, *minor*), 4.06-3.94 (m, 5H *major*, 4H *minor*), 3.19 (t,  $J = 7.7$  Hz, 1H, *major and minor*), 2.71-2.65 (m, 1H, *minor*), 2.46-2.38 (m, 1H, *major*), 2.29-2.05 (m, 3H, *major and minor*), 1.82-1.51 (m, 5H, *major and minor*), 1.08-1.02 (m, 8H, *major and minor*);  $^{13}\text{C}$  NMR (75 MHz,  $\text{CDCl}_3$ )  $\delta$  205.7, 204.7, 169.6, 169.5, 169.4, 65.4, 62.4, 62.0, 62.0, 50.0, 50.0, 46.0, 44.9, 36.1, 35.9, 35.9, 35.4, 35.2, 35.2, 34.2, 33.2, 25.1, 23.2, 14.4; HRMS-ES  $[\text{M} + \text{Na}]^+$  calcd for  $\text{C}_{15}\text{H}_{23}\text{ClNaO}_5$ , 341.1132; found, 341.1141.

**2-(4-Chloro-3-*tert*-butyldimethylsilyloxyimino-**

**cycloheptylmethyl)-malonic Acid Diethyl Ester (35).** To a solution of  $\alpha$ -chloroketone **34** (48 mg, 0.15 mmol) in dichloromethane (3 mL) were added

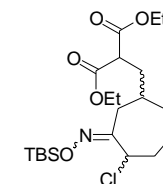

*O*-(*tert*-butyldimethylsilyl)-hydroxylamine (45 mg, 0.30 mmol), 4Å molecular sieves (crushed), and a catalytic amount of PPTS. The mixture was stirred at rt for 48 h and then filtered through a pad of Celite. The solvent was removed under reduced pressure and the residue was purified by flash column chromatography (20% ether/hexanes) to afford the  $\alpha$ -chloroketoxime **35** (colorless oil) as a complex mixture of stereoisomers (57 mg, 83%).  $^1\text{H}$  NMR (300 MHz,  $\text{CDCl}_3$ )  $\delta$  5.47 (s, 0.02H), 5.26 (dd,  $J = 4.4, 8.1$  Hz, 0.28H), 5.09 (dd,  $J = 6.3, 10.7$  Hz, 0.18H), 4.75-4.72 (m, 0.11H), 4.57-4.39 (m, 0.27H), 4.10-3.92 (m, 4H), 3.43-3.28 (m, 1H), 3.22-3.16 (m, 0.25H), 2.86 (d,  $J = 11.8$  Hz, 0.33H), 2.60-1.49 (m, 9H), 1.32-1.27 (m, 1.5H), 1.16-1.07 (m, 6H), 0.77 (s, 9H), 0.00 (s, 6H); HRMS-ES  $[\text{M} + \text{H}]^+$  calcd for  $\text{C}_{21}\text{H}_{39}\text{ClNO}_5\text{Si}$ , 448.2286; found, 448.2274.

**9-Hydroxyiminobicyclo[3.2.2]nonane-6,6-dicarboxylic Acid**

**Diethyl Ester (36).** To a stirred solution of oxime **35** (20.0 mg, 0.044

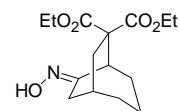

mmol) in THF (2 mL) at  $-78\text{ }^{\circ}\text{C}$  was added dropwise NaHMDS (1 M in THF, 0.044 mL, 0.044 mmol) via syringe, and the reaction mixture was stirred at  $-78\text{ }^{\circ}\text{C}$  for 1 h. TBAF (1 M in THF, 0.067 mL, 0.067 mmol) was added dropwise via syringe, and the mixture was warmed to rt over 2 h. Saturated aqueous  $\text{NH}_4\text{Cl}$  (5 mL) was then added. The mixture was extracted with ether (10 mL x 3), and the combined extracts were dried over  $\text{Na}_2\text{SO}_4$ . The solvent was removed under reduced pressure and the residue was purified by flash column chromatography (50% ether/hexanes) to afford the bridged bicyclic oxime **36** as a colorless oil (6.9 mg, 53%).  $^1\text{H}$  NMR (300 MHz,  $\text{CDCl}_3$ , 5:1 geometrical isomer mixture)  $\delta$  7.62 (br s, 1H, *major and minor*), 4.10-3.88 (m, 4H, *major and minor*), 3.18 (t,  $J = 4.7$  Hz, 1H, *major*), 2.91 (t,  $J = 2.8$  Hz, 1H, *minor*), 2.55-2.45 (m, 1H, *major*), 2.32-2.09 (m, 4H, *major and minor*), 1.98-1.94 (m, 1H, *minor*), 1.86-1.75 (m, 2H, *minor*), 1.64 (q,  $J = 5.9$  Hz, 2H, *major*), 1.54-1.48 (m, 2H, *major and minor*), 1.41-1.19 (m, 2H, *major and minor*), 1.12-1.02 (m, 6H, *major and minor*);  $^{13}\text{C}$  NMR (75 MHz,  $\text{CDCl}_3$ )  $\delta$  172.4, 171.6, 171.5, 171.2, 161.5, 161.2, 62.1, 62.0, 57.0, 55.3, 42.5, 37.6, 34.9, 33.1, 32.9, 30.5, 30.4, 30.1, 28.6, 27.5, 25.7, 24.4, 21.6, 21.0, 14.4, 14.4, 14.3; HRMS-ES  $[\text{M} + \text{H}]^+$  calcd for  $\text{C}_{15}\text{H}_{24}\text{NO}_5$ , 298.1654; found, 298.1662.

**2-(2-Chloroallyl)-hex-5-enoic Acid Methyl Ester (37).** To a solution of LDA (2 M in THF, 10 mL, 20.0 mmol) and DMPU (2.8 mL, 21.8 mmol) in THF (15 mL) was added 5-hexenoic acid methyl ester (2.00 g, 15.6 mmol) in THF (15 mL) dropwise at  $-78\text{ }^{\circ}\text{C}$ . The mixture was stirred for 45 min at  $-78\text{ }^{\circ}\text{C}$ . 2-Chloro-3-iodopropene (4.0 g, 19.8 mmol) was added, and the reaction mixture was allowed to warm to  $0\text{ }^{\circ}\text{C}$  over 3 h. Saturated aqueous  $\text{NH}_4\text{Cl}$  (30 mL) and EtOAc (50

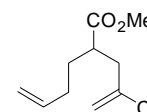

mL) were added. The organic layer was dried over MgSO<sub>4</sub>. The solvent was removed under reduced pressure and the residue was purified by flash column chromatography on silica gel (10% EtOAc/hexanes) to afford the title compound **37** as a yellow oil (2.52 g, 80%). <sup>1</sup>H NMR (400 MHz, CDCl<sub>3</sub>) δ 5.65 (m, 1H), 5.12 (dd, *J* = 1.1, 8.9 Hz, 2H), 4.99-4.93 (m, 0.5H), 4.95-4.93 (m, 1H), 4.91-4.90 (m, 0.5H), 3.61 (s, 3H), 2.63-2.60 (m, 1H), 2.64 (dd, *J* = 8.3, 22.6 Hz, 2H), 2.38 (dd, *J* = 6.2, 14.3 Hz, 1H), 2.01-1.98 (m, 2H), 1.63-1.72 (m 1H), 1.59-1.61 (m, 1H); <sup>13</sup>C NMR (75 MHz, CDCl<sub>3</sub>) δ 175.5, 140.2, 137.7, 115.7, 114.6, 51.9, 43.1, 41.9, 31.6, 31.1.

**2-(2-Chloroallyl)-hex-5-en-1-ol (38).** To a suspension of LiAlH<sub>4</sub> (1.5 g, 39.8 mmol) in THF (50 mL) at 0 °C was added dropwise ester **37** (4.50 g, 22.3 mmol) in ether (50 mL) over 10 min. The mixture was stirred for 12 h at rt, and diluted with EtOAc (20 mL). The mixture was then poured into 1 M HCl solution (30 mL) and saturated aqueous NH<sub>4</sub>Cl (10 mL) and EtOAc (10 mL) were added. The organic layer was dried over MgSO<sub>4</sub>. The solvent was removed under reduced pressure, and the residue was purified by flash column chromatography (10-30% EtOAc/hexanes gradient) to afford the title compound **38** as a clear oil (3.09 g, 95%). <sup>1</sup>H NMR (300 MHz, CDCl<sub>3</sub>) δ 5.81-5.68 (m, 1H), 5.13 (dd, *J* = 0.9, 11.7 Hz, 2H), 5.01-4.88 (m, 2H), 3.55 (t, *J* = 4.3 Hz, 2H), 2.40 (dd, *J* = 7.5, 14.3 Hz, 1H), 2.25 (dd, *J* = 6.7, 14.2 Hz, 1H), 2.12-1.99 (m, 2H), 1.93-1.80 (m, 1H), 1.49-1.30 (m, 2H); <sup>13</sup>C NMR (75 MHz, CDCl<sub>3</sub>) δ 141.9, 138.9, 115.2, 114.3, 64.5, 41.5, 37.9, 31.4, 29.8; HRMS-EI [*M*]<sup>+</sup> calcd for C<sub>9</sub>H<sub>15</sub>ClO, 174.0811; found, 175.0815.

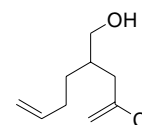

**Methanesulfonic Acid 2-(2-Chloroallyl)-hex-5-enyl Ester (39).**

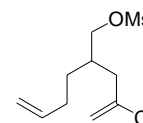

To a solution of alcohol **38** (152 mg, 0.87 mmol) in dichloromethane (3 mL) at 0 °C was added portionwise triethylamine (117  $\mu$ L, 0.79 mmol) and mesyl chloride (40  $\mu$ L, 0.54 mmol). The mixture was stirred at 0 °C for 30 min, and then at rt for 30 min. The organic phase was washed consecutively with brine (10 mL), 1 M aqueous KHSO<sub>4</sub> (10 mL), brine (10 mL), 5% aqueous NaHCO<sub>3</sub> (10 mL), brine (10 mL), and dried over Na<sub>2</sub>SO<sub>4</sub> overnight. The solvent was removed under reduced pressure to afford the title compound **39** as a clear oil which was used for the next step without further purification (206 mg, 94%). <sup>1</sup>H NMR (75 MHz, CDCl<sub>3</sub>)  $\delta$  5.81-5.72 (m, 1H), 5.20-5.09 (m, 4H), 4.21-4.19 (m, 2H), 3.03 (s, 3H), 2.45-2.40 (m, 2H), 2.21-2.17 (m, 2H), 1.92-1.86 (m, 1H), 1.73-1.70 (m, 2H); <sup>13</sup>C NMR (300 MHz, CDCl<sub>3</sub>)  $\delta$  142.4, 135.2, 118.2, 113.1, 71.6, 37.6, 36.9, 36.6, 35.2, 28.2; HRMS-ES [M + Na]<sup>+</sup> calcd for C<sub>10</sub>H<sub>17</sub>O<sub>3</sub>SClNa, 275.0485; found, 275.0487.

**2-Chloro-4-iodomethylocta-1,7-diene (40).** To a solution of

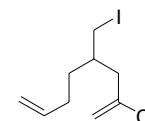

mesylate **39** (3.09 g, 12.30 mmol) in acetone (30 mL) was added sodium iodide (5.51 g, 36.70 mmol), and the mixture was stirred at 60 °C for 5 h. The solvent was then removed under reduced pressure and the residue was purified by flash column chromatography (pentane) to afford the title compound **40** as a clear oil (3.29 g, 94%). <sup>1</sup>H NMR (400 MHz, CDCl<sub>3</sub>)  $\delta$  5.87-5.78 (m, 1H), 5.29 (dd, *J* = 0.7, 7.6 Hz, 2H), 5.10-5.00 (m, 2H), 3.50 (ddd, *J* = 0.9, 7.0, 14.1 Hz, 1H), 3.32 (ddd, *J* = 3.7, 10.1, 21.6 Hz, 2H), 2.14 (dd, *J* = 21.8, 25.1, 1H), 2.04 (dd, *J* = 21.8, 25.1, 1H), 1.46-1.49 (m, 4H), 1.22-1.21 (m, 1H); <sup>13</sup>C NMR (75 MHz, CDCl<sub>3</sub>)  $\delta$  140.4, 138.1, 115.7, 115.3,



44.6, 34.7, 33.4, 31.0, 15.6; HRMS-EI  $[M]^+$  calcd for  $C_9H_{14}Cl$ , 283.9822; found, 283.9829.

**2-[2-(2-Chloroallyl)-hex-5-enyl]-malonic Acid Diethyl Ester**

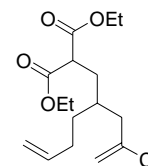

(41). To a solution of iodide **40** (816 mg, 2.90 mmol) and diethyl malonate (486 mg, 3.04 mmol) in acetonitrile (50 mL) was added Verkade's base (656 mg, 3.04 mmol), and the reaction mixture was stirred at rt for 24 h. The solvent was removed under reduced pressure, and the residue was purified by flash column chromatography (5-20% EtOAc/hexanes gradient) to afford the title compound **41** as a clear oil (653 mg, 74%).  $^1H$  NMR (300 MHz,  $CDCl_3$ )  $\delta$  5.87-5.73 (m, 1H), 5.22 (d,  $J = 16.2$  Hz, 2H), 5.08-4.97 (m, 2H), 4.22 (dd,  $J = 7.1, 14.2$  Hz, 4H), 3.54-3.45 (m, 1H), 2.39-2.26 (m, 2H), 2.14-2.04 (m, 2H), 1.96-1.91 (m, 2H), 1.84-1.76 (m, 1H), 1.60 (s, 1H), 1.49-1.32 (m, 1H), 1.30 (t,  $J = 5.6$  Hz, 6H);  $^{13}C$  NMR (75 MHz,  $CDCl_3$ )  $\delta$  138.6, 115.2, 114.5, 61.8, 50.2, 44.0, 33.1, 32.6, 32.0, 30.6, 14.4; HRMS-ES  $[M + Na]^+$  calcd for  $C_{16}H_{25}ClNaO_4$ , 339.1339; found, 339.1349.

**2-(3-Chlorocyclohex-3-enylmethyl)-malonic Acid Diethyl Ester**

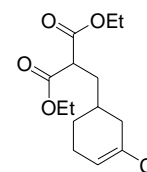

(42). A flame dried 50 mL two necked flask equipped with a condenser and a magnetic stirring bar was charged with ester **41** (100 mg, 0.32 mmol) and benzene (40 mL). The mixture was deaerated with argon for 1 h. Grubbs 2<sup>nd</sup> generation catalyst (20 mg, 0.03 mmol) in benzene (10 mL) was added *via* syringe. The mixture was deaerated with argon for another 20 min and then heated at 65 °C for three days. The solvent was removed under reduced pressure, and the residue was purified by flash

column chromatography (2 - 5% ether/pentane gradient) to afford the title compound **42** as a yellow oil (67 mg, 74%).  $^1\text{H}$  NMR (400 MHz,  $\text{CDCl}_3$ )  $\delta$  5.72-5.70 (m, 1H), 4.18-4.08 (m, 4H), 2.31-2.26 (m, 1H), 2.09-1.80 (m, 5.5H), 1.67-5.58 (m, 2.5H), 1.20 (t,  $J = 8.0$  Hz, 6H);  $^{13}\text{C}$  NMR (75 MHz,  $\text{CDCl}_3$ )  $\delta$  167.6, 128.7, 122.5, 59.7, 47.8, 36.9, 32.8, 31.1, 25.4, 23.7, 12.3; HRMS-AP  $[\text{M} + \text{H}]^+$  calcd for  $\text{C}_{14}\text{H}_{22}\text{O}_4\text{Cl}$ , 289.1207; found, 289.1214.

**2-(4-Chloro-3-Oxocyclohexylmethyl)-malonic Acid Diethyl**

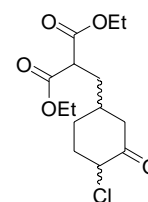

**Ester (43).** To a solution of ester **42** (280 mg, 0.97 mmol), acetone (3.39 mL), glacial acetic acid (1.60 mL) at  $0^\circ\text{C}$  was added dropwise aqueous sodium hypochlorite (638  $\mu\text{L}$  of 10% solution, 0.97 mmol) *via* syringe. The reaction mixture was stirred at  $0^\circ\text{C}$  for 30 min, and quenched by addition of aqueous saturated  $\text{Na}_2\text{CO}_3$  solution. The mixture was then extracted with dichloromethane (20 mL x 2). The combined organic layers were washed with brine (10 mL) and dried over  $\text{Na}_2\text{SO}_4$ . The solvent was removed under reduced pressure and the residue was purified by flash column chromatography (10% EtOAc/hexanes) to afford the title compound **43** (yellow oil) as a 4:6 mixture of diastereomers (139 mg, 47%, 67% brsm). For characterization purposes the two diastereomers were separated by column chromatography. *More polar major diastereomer:*  $^1\text{H}$  NMR (400 MHz,  $\text{CDCl}_3$ )  $\delta$  4.75-4.74 (m, 1H), 4.18-4.08 (m, 4H), 3.37-3.31 (m, 1H), 2.65-2.60 (m, 1H), 2.17-1.94 (m, 4H), 1.82-1.77 (m, 2H), 1.52-1.40 (m, 1H), 1.23-1.17 (m, 6H);  $^{13}\text{C}$  NMR (75 MHz,  $\text{CDCl}_3$ )  $\delta$  203.9, 169.6, 169.4, 62.2, 62.0, 61.9, 60.5, 49.6, 42.7, 37.1, 35.0, 34.8, 33.8, 32.7, 30.6, 25.9, 22.3, 14.4. *Less polar minor diastereomer:*  $^1\text{H}$  NMR (400 MHz,  $\text{CDCl}_3$ )  $\delta$  (m, 4.40-4.33, 1H), 4.16-4.09

(m, 4H), 3.30 (t,  $J = 4.0$  Hz, 1H), 2.68-2.63 (m, 1H), 2.48-2.44 (m, 1H), 2.06-1.79 (m, 6H), 1.50-1.49 (m, 1H), 1.23-1.17 (m, 6H);  $^{13}\text{C}$  NMR (75 MHz,  $\text{CDCl}_3$ )  $\delta$  202.5, 170.4, 64.9, 63.2, 50.9, 47.9, 38.7, 37.9, 36.1, 32.3, 15.5; HRMS-ES  $[\text{M} + \text{Na}]^+$  calcd for  $\text{C}_{14}\text{H}_{21}\text{ClNaO}_5$ , 327.0975; found, 327.0984.

**2-(4-Chloro-3-*tert*-butyldimethylsilyloxyimino-cyclohexylmethyl)-malonic Acid Diethyl Ester (44).** To a solution of

$\alpha$ -chloroketone **43** (131 mg, 0.43 mmol) in dichloromethane (0.7 mL) were added *O*-(*tert*-butyldimethylsilyl)-hydroxylamine (127 mg, 0.86

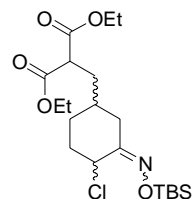

mmol), 4Å molecular sieves (crushed), and a catalytic amount of PPTS. The mixture was stirred at rt for 12 h and then filtered through a pad of Celite. The solvent was removed under reduced pressure and the residue was purified by flash column chromatography (10% EtOAc/hexanes) to afford the title compound **44** as a clear oil which was an inseparable complex mixture of diastereomers (171 mg, 92%).  $^1\text{H}$  NMR (300 MHz,  $\text{CDCl}_3$ )  $\delta$  5.51 (brs, 0.3H), 4.95 (brs, 0.6H), 4.11-3.95 (m, 4H), 3.34-3.06 (m, 1H), 2.12-2.00 (m, 1H), 1.91-1.71 (m, 2H), 1.67-1.48 (m, 3H), 1.43-1.27 (m, 2H), 1.11 (t,  $J = 7.1$  Hz, 3H), 1.10 (t,  $J = 7.1$  Hz, 3H), 0.74 (s, 9H), 0.00 (s, 6H); HRMS-ES  $[\text{M} + \text{H}]^+$  calcd for  $\text{C}_{20}\text{H}_{37}\text{NO}_5\text{SiCl}$ , 434.2130; found, 434.2130.

**6-Hydroxyiminobicyclo[2.2.2]octane-2,2-dicarboxylic Acid Diethyl Ester (45).** To a solution of oxime **44** (20 mg, 0.046 mmol) in

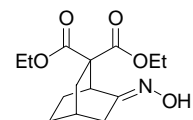

THF (0.5 mL) at  $-78^\circ\text{C}$  was added dropwise NaHMDS (2 M in THF, 31  $\mu\text{L}$ , 0.062 mmol) *via* syringe, and the reaction mixture was stirred at  $-78^\circ\text{C}$  for 1 h. TBAF (1 M in

THF, 62  $\mu$ L, 0.062 mmol) was added dropwise *via* syringe, and the mixture was warmed to rt over 2 h. Saturated aqueous  $\text{NH}_4\text{Cl}$  (5 mL) was then added. The mixture was extracted with ether (10 mL x 3), and the combined extracts were dried over  $\text{MgSO}_4$ . The solvent was removed under reduced pressure and the residue was purified by flash column chromatography (50% ether/pentane) to afford the title compound **45** as a clear oil (10 mg, 74%).  $^1\text{H}$  NMR (400 MHz,  $\text{CDCl}_3$ )  $\delta$  8.55 (m, 1H), 4.25-4.11 (m, 4H), 3.07 (m, 1H), 2.41 (m, 2H), 2.25 (m, 2H), 2.21-1.97 (m, 1H), 1.96-1.90 (m, 1H), 1.65-1.47 (m, 3H), 1.28-1.19 (m, 6H);  $^{13}\text{C}$  NMR (75 MHz,  $\text{CDCl}_3$ )  $\delta$  171.5, 171.2, 161.0, 62.1, 62.0, 55.3, 37.6, 32.9, 30.4, 25.7, 24.3, 21.6, 14.4, 14.3; HRMS-ES  $[\text{M} + \text{H}]^+$  calcd for  $\text{C}_{14}\text{H}_{22}\text{NO}_5$ , 284.1498; found, 284.1496.

**2-(2-Chloroallyloxy)-but-3-en-1-ol (47).** To a suspension of  $\text{LiAlH}_4$  (0.18 g, 4.73 mmol) in THF (20 mL) at 0  $^\circ\text{C}$  was added dropwise ester **46** (1.00 g, 4.73 mmol) in ether (20 mL) over 5 min. The mixture was stirred for 2 h at rt, and diluted with EtOAc (10 mL). The mixture was then poured into saturated aqueous  $\text{NH}_4\text{Cl}$  (10 mL) and extracted with EtOAc (10 mL). The organic layer was dried over  $\text{MgSO}_4$  and the solvent was removed under reduced pressure. The residue was purified by flash column chromatography (10-30% EtOAc/hexanes gradient) to afford the title compound **47** as a clear oil (0.75 g, 90%).  $^1\text{H}$  NMR (300 MHz,  $\text{CDCl}_3$ )  $\delta$  6.18-5.45 (m, 1H), 5.49 (d,  $J = 1.2\text{ Hz}$ , 1H), 5.39 (d,  $J = 0.6\text{ Hz}$ , 1H), 5.29 (dd,  $J = 0.6, 0.7\text{ Hz}$ , 1H), 5.26 (dd,  $J = 3.8, 0.8\text{ Hz}$ , 1H), 4.16-4.01 (m, 3H), 3.96-3.79 (m, 2H), 2.35 (m, 1H), 1.90-1.82 (m, 1H);  $^{13}\text{C}$  NMR (75 MHz,  $\text{CDCl}_3$ )  $\delta$  138.7, 137.8, 118.5, 114.4, 80.2, 70.9, 60.7, 38.2; HRMS-ES  $[\text{M} + \text{Na}]^+$  calcd for  $\text{C}_8\text{H}_{13}\text{ClO}_2\text{Na}$ , 199.0502; found 199.0500.

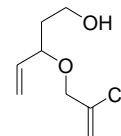

**Methanesulfonic Acid 2-(2-Chloroallyloxy)-but-3-enyl Ester**

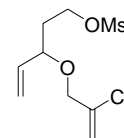

**(48).** To a solution of alcohol **47** (1.22 g, 6.90 mmol) in dichloromethane (21 mL) at 0 °C was added triethylamine (928  $\mu$ L, 6.27 mmol) and mesyl chloride (562  $\mu$ L, 7.59 mmol) portionwise. The mixture was stirred at 0 °C for 30 min, and then at rt for 30 min. The organic phase was washed consecutively with brine (10 mL), 1 M aqueous KHSO<sub>4</sub> (10 mL), brine (10 mL), 5% aqueous NaHCO<sub>3</sub> (10 mL), brine (10 mL), and dried over Na<sub>2</sub>SO<sub>4</sub> overnight. The solvent was removed under reduced pressure to afford the title compound **48** as a clear oil used for the next step without further purification (206 mg, 94%). <sup>1</sup>H NMR (300 MHz, CDCl<sub>3</sub>)  $\delta$  5.70-5.67 (m, 1H), 5.45 (s, 1H), 5.44 (s, 1H), 5.37-5.27 (m, 2H), 4.43-4.33 (m, 2H), 4.13-4.08 (m, 1H), 3.97-3.93 (m, 2H), 3.02 (s, 3H), 2.06-1.97 (m, 2H); <sup>13</sup>C NMR (75 MHz, CDCl<sub>3</sub>)  $\delta$  138.6, 137.2, 119.4, 114.4, 77.4, 71.0, 67.1, 37.6, 35.4; HRMS-ES [M + H]<sup>+</sup> calcd for C<sub>9</sub>H<sub>16</sub>ClO<sub>4</sub>S, 254.0458; found 255.0463.

**3-(2-Chloroallyloxy)-5-iodopent-1-ene (49).** To a solution of

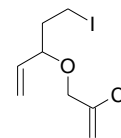

mesylate **48** (400 mg, 1.60 mmol) in acetone (10 mL) was added sodium iodide (964 mg, 6.40 mmol), and the mixture was stirred at 60 °C for 5 h. The solvent was then removed under reduced pressure and the residue was purified by flash column chromatography (pentane) to afford the title compound **49** as a clear oil (399 mg, 88%). <sup>1</sup>H NMR (300 MHz, CDCl<sub>3</sub>)  $\delta$  5.77-5.65 (m, 1H), 5.47 (dd, *J* = 1.3, 2.6 Hz, 1H), 5.39-5.29 (m, 3H), 4.15-3.80 (m, 3H), 3.76-3.22 (m, 2H), 2.23-1.94 (m, 2H);

$^{13}\text{C}$  NMR (75 MHz,  $\text{CDCl}_3$ )  $\delta$  138.8, 137.2, 119.0, 114.0, 80.8, 71.1, 39.5, 2.3; HRMS-AP  $[\text{M}+\text{H}]^+$  calcd for  $\text{C}_8\text{H}_{13}\text{ClIO}$ , 286.9700; found, 286.9706.

**2-[3-(2-Chloroallyloxy)-pent-4-enyl]-malonic Acid Diethyl**

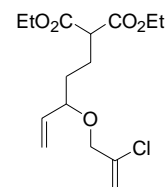

**Ester (50).** To a solution of iodide **49** (881 mg, 3.09 mmol) and diethyl malonate (520 mg, 3.24 mmol) in acetonitrile (40 mL) was added

Verkade's base (700 mg, 3.24 mmol), and the reaction mixture was stirred at rt for 24 h.

The solvent was removed under reduced pressure, and the residue was purified by flash column chromatography (5-20% EtOAc/hexanes gradient) to afford the title compound

**50** as a clear oil (827 mg, 86%).  $^1\text{H}$  NMR (300 MHz,  $\text{CDCl}_3$ )  $\delta$  5.73-5.61 (m, 1H), 5.45-5.20 (m, 4H), 4.25-4.17 (m, 4H), 4.00 (dd,  $J = 13.8, 44.4$  Hz, 2H), 3.77 (q,  $J = 7.1$  Hz, 1H), 3.37 (m, 1H), 2.09-1.89 (m, 2H), 1.80-1.46 (m, 2H), 1.27 (t,  $J = 6.9$  Hz, 6H);  $^{13}\text{C}$  NMR (75 MHz,  $\text{CDCl}_3$ )  $\delta$  169.7, 138.8, 138.0, 118.5, 113.5, 80.6, 70.7, 61.6, 52.0, 33.1, 25.0, 14.4; HRMS-ES  $[\text{M}+\text{H}]^+$  calcd for  $\text{C}_{15}\text{H}_{24}\text{ClO}_5$ , 319.1312; found, 319.1310.

**2-[2-(4-Chloro-2,5-dihydrofuran-2-yl)-ethyl]-malonic Acid**

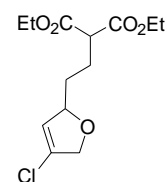

**Diethyl Ester (51).** A flame dried 50 mL two necked flask equipped with a condenser and a magnetic stirring bar was charged with ester **50** (100 mg, 0.35 mmol) and toluene (60 mL). The mixture was deaerated with argon for 1 h.

Grubbs 2<sup>nd</sup> generation catalyst (30 mg, 0.03 mmol) in toluene (10 mL) was added *via* syringe. The combined mixture was deaerated with argon for another 20 min and then heated at 120 °C for 24 h. The solvent was removed under reduced pressure and the residue was purified by flash column chromatography (2-5% ether/pentane gradient) to

afford the title compound **51** as a yellow oil (63 mg, 62%).  $^1\text{H NMR}$  (400 MHz,  $\text{CDCl}_3$ )  $\delta$  5.78-5.74 (m, 1H), 4.92-4.87 (m, 1H), 4.55-4.50 (m, 2H), 4.23-4.17 (m, 4H), 3.36 (t,  $J = 6.0$  Hz, 1H), 1.98-1.93 (m, 2H), 1.65-1.60 (m, 2H), 1.27 (t,  $J = 9.5$  Hz, 6H);  $^{13}\text{C NMR}$  (75 MHz,  $\text{CDCl}_3$ )  $\delta$  169.7, 129.0, 124.9, 85.9, 76.1, 61.8, 52.1, 33.6, 24.5, 14.4; HRMS-ES  $[\text{M}+\text{H}]^+$  calcd for  $\text{C}_{13}\text{H}_{20}\text{ClO}_5$ , 291.0999; found, 291.0995.

**2-[2-(3-Chloro-4-oxotetrahydrofuran-2-yl)-ethyl]-malonic Acid**

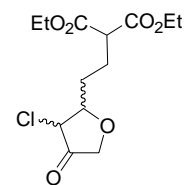

**Diethyl Ester (52).** To a solution of ester **51** (125 mg, 0.43 mmol), in acetone (1.86 mL), and glacial acetic acid (0.75 mL) at  $0^\circ\text{C}$  was added dropwise aqueous sodium hypochlorite (300  $\mu\text{L}$  of 10% solution, 0.47 mmol) *via* syringe. The reaction mixture was stirred for 20 min at  $0^\circ\text{C}$  and quenched by addition of aqueous saturated  $\text{Na}_2\text{CO}_3$  solution. The mixture was then extracted with dichloromethane (20 mL x 2). The combined organic layers were washed with brine (10 mL) and dried over  $\text{Na}_2\text{SO}_4$ . The solvent was removed under reduced pressure and the residue was purified by flash column chromatography (10% EtOAc/hexanes) to afford the title compound **52** (yellow oil) as an inseparable 1:1 mixture of diastereomers (73 mg, 56%).  $^1\text{H NMR}$  (400 MHz,  $\text{CDCl}_3$ )  $\delta$  4.38-3.92 (m, 6H), 3.91-3.82 (m, 1H), 3.42-3.35 (m, 1H), 2.31-1.67 (m, 5H);  $^{13}\text{C NMR}$  (75 MHz,  $\text{CDCl}_3$ )  $\delta$  207.3, 169.7, 169.4, 124.9, 85.9, 80.6, 77.8, 77.4, 69.6, 61.9, 61.8, 57.7, 52.1, 52.0, 51.9, 51.0, 42.9, 41.7, 38.3, 33.6, 28.1, 24.8, 24.5, 22.8, 17.0, 14.4, 14.3; HRMS-ES  $[\text{M}+\text{H}]^+$  calcd for  $\text{C}_{13}\text{H}_{20}\text{ClO}_6$ , 307.0948; found, 307.0943.

**2-[2-(3-Chloro-4-*tert*-butyldimethylsilyloxyimino-tetrahydrofuran-2-yl)-ethyl]-malonic Acid Diethyl Ester (53).** To

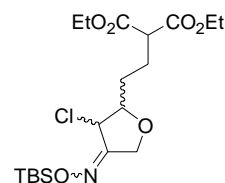

a solution of  $\alpha$ -chloroketone **52** (10 mg, 0.03 mmol) in dichloromethane (0.5 mL) were added *O*-(*tert*-butyldimethylsilyl)-hydroxylamine (10 mg, 0.07 mmol), 4Å molecular sieves (crushed) and a catalytic amount of PPTS. The mixture was stirred at rt for 24 h and then filtered through a pad of Celite. The solvent was removed under reduced pressure and the residue was purified by flash column chromatography (10% EtOAc/hexanes) to afford the title compound **53** (clear oil) as an inseparable complex mixture of stereoisomers (6 mg, 43%). <sup>1</sup>H NMR (400 MHz, CDCl<sub>3</sub>)  $\delta$  4.76-4.36 (m, 3H), 4.30-4.18 (m, 4H), 4.21-4.01 (m, 1H), 4.47-4.36 (m, 3H), 4.30-4.19 (m, 4H), 3.43-3.37 (m, 6H), 1.33-1.24 (m, 6H), 0.94 (s, 9H), 0.16 (s, 6H); HRMS-ES [M+H]<sup>+</sup> calcd for C<sub>19</sub>H<sub>35</sub>ClNO<sub>6</sub>Si, 436.1922; found, 436.1928.

### 3-Hydroxyiminohexahydrocyclopenta[b]furan-4,4-

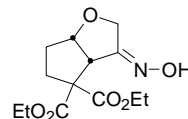

**dicarboxylic Acid Diethyl Ester (54).** To a solution of oxime **53** (8 mg, 0.018 mmol) in THF (0.5 mL) at -78 °C was added dropwise NaHMDS (2 M in THF, 24  $\mu$ L, 0.024 mmol) *via* syringe, and the reaction mixture was stirred at -78 °C for 1 h. TBAF (1 M in THF, 48  $\mu$ L, 0.048 mmol) was then added dropwise *via* syringe, and the mixture was warmed to 0 °C over 2 h. Saturated aqueous NH<sub>4</sub>Cl (5 mL) was then added. The mixture was extracted with ether (10 mL x 3), and the combined extracts were dried over Na<sub>2</sub>SO<sub>4</sub>. The solvent was removed under reduced pressure and the residue was purified by flash column chromatography (50% ether/pentane) to afford the title compound **54** as a clear oil (6 mg, 95%). <sup>1</sup>H NMR (400 MHz, CDCl<sub>3</sub>)  $\delta$  4.77 (t, *J* = 5.2 Hz, 1H), 4.52 (dd, *J* = 15.2, 41.1 Hz, 2H), 4.45-4.02 (m, 5H), 2.64 (td, *J* = 6.7, 13.3 Hz, 2H), 2.26 (q, *J* = 6.8 Hz, 1H), 2.04 (q, *J* = 7.2 Hz, 1H), 1.72-1.62 (m, 1H), 1.29 (m,



6H);  $^{13}\text{C}$  NMR (75 MHz,  $\text{CDCl}_3$ )  $\delta$  171.5, 169.4, 164.2, 85.5, 77.6, 67.7, 65.5, 62.4, 62.0, 50.9, 33.0, 32.2, 30.1, 14.3; HRMS-ES  $[\text{M}+\text{H}]^+$  calcd for  $\text{C}_{13}\text{H}_{20}\text{NO}_6$ , 286.1291; found, 286.1290.

**3-(3-Chlorocyclopent-3-enyl)-propionic Acid Ethyl Ester (55).**

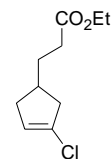

To a stirred solution of diester **24** (100 mg, 0.36 mmol) and water (0.05 mL) in DMSO (3 mL) was added LiCl (35 mg, 0.79 mmol). The reaction mixture was heated at reflux for 5 h, and then cooled to rt. Saturated aqueous  $\text{NH}_4\text{Cl}$  (10 mL) was added and the aqueous phase was extracted with ether (10 mL x 3). The combined organic layers were dried over  $\text{Na}_2\text{SO}_4$ . The solvent was removed under reduced pressure, and the residue was purified by flash column chromatography (15% ether/hexanes) to afford the monoester **55** as a clear oil (68 mg, 93%).  $^1\text{H}$  NMR (300 MHz,  $\text{CDCl}_3$ )  $\delta$  5.53-5.50 (m, 1H), 4.05 (q,  $J = 7.1$  Hz, 2H), 2.57-2.41 (m, 2H), 2.35-2.30 (m, 1H), 2.23 (t,  $J = 5.2$  Hz, 2H), 2.20-2.12 (m, 1H), 1.99-1.90 (m, 1H), 1.70 (q,  $J = 7.3$  Hz, 2H), 1.18 (t,  $J = 7.1$  Hz, 3H);  $^{13}\text{C}$  NMR (75 MHz,  $\text{CDCl}_3$ )  $\delta$  172.3, 130.1, 124.4, 59.3, 42.1, 36.3, 35.7, 31.6, 30.2, 13.1; HRMS-AP  $[\text{M}+\text{H}]^+$  calcd for  $\text{C}_{10}\text{H}_{16}\text{ClO}_2$ , 203.0839; found, 203.0838.

**3-(3-Chloro-4-Oxocyclopentyl)-propionic Acid Ethyl Ester (56).**

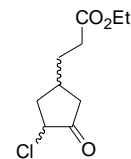

To a solution of vinyl chloride **55** (121 mg, 0.59 mmol), acetone (2.5 mL) and glacial acetic acid (1 mL) at 0 °C was added dropwise sodium hypochlorite (0.48 mL of 10% solution, 0.59 mmol) via syringe. The reaction mixture was stirred at 0 °C for 1 h and quenched by addition of saturated aqueous  $\text{NaHCO}_3$  solution. The

mixture was then extracted with dichloromethane (10 mL x 2). The combined organic layers were washed with brine (10 mL) and dried over Na<sub>2</sub>SO<sub>4</sub>. The solvent was removed under reduced pressure and the residue was purified by flash column chromatography (50% ether/hexanes) affording the  $\alpha$ -chloroketone **56** as a clear oil (60 mg, 46%). <sup>1</sup>H NMR (300 MHz, CDCl<sub>3</sub>)  $\delta$  4.07 (q, *J* = 7.1 Hz, 3H), 2.63-2.43 (m, 2H), 2.30 (t, *J* = 7.2 Hz, 2H), 2.28-2.23 (m, 1H), 1.94-1.69 (m, 4H), 1.20 (t, *J* = 7.1 Hz, 3H); <sup>13</sup>C NMR (75 MHz, CDCl<sub>3</sub>)  $\delta$  210.2, 173.3, 61.0, 57.7, 42.4, 39.9, 33.5, 32.9, 30.5 14.6; HRMS-ES [M + Na]<sup>+</sup> calcd for C<sub>10</sub>H<sub>15</sub>ClNaO<sub>3</sub>, 241.0607; found, 241.0604.

**3-(3-Chloro-4-*tert*-butyldimethylsilyloxyiminocyclopentyl)-propionic Acid Ethyl Ester (11).** To a solution of  $\alpha$ -chloroketone **56** (52 mg, 0.23 mmol) in dichloromethane (3 mL) were added *O*-(*tert*-butyldimethylsilyl)-hydroxylamine (50 mg, 0.34 mmol), 4Å molecular sieves (crushed), and a catalytic amount of PPTS. The mixture was stirred at rt for 12 h and then filtered through a pad of Celite. The solvent was removed under reduced pressure and the residue was purified by flash column chromatography (20% ether/hexanes) to afford the  $\alpha$ -chloroketoxime **11** as a colorless oil (76 mg, 93%). <sup>1</sup>H NMR (300 MHz, CDCl<sub>3</sub>, 2:1 geometrical isomer mixture)  $\delta$  4.84 (d, *J* = 5.6 Hz, 1H, *minor*), 4.62 (d, *J* = 5.1 Hz, 1H, *major*), 3.97 (q, *J* = 7.1 Hz, 2H, *major and minor*), 2.75-2.60 (m, 1H, *major and minor*), 2.35-2.30 (m, 1H, *major and minor*), 2.22-2.15 (m, 2H, *major and minor*), 2.10-2.03 (m, 1H, *major and minor*), 1.88-1.78 (m, 1H, *major and minor*), 1.63-1.48 (m, 3H, *major and minor*), 1.09 (t, *J* = 7.1 Hz, 3H, *major and minor*), 0.77 (s, 9H, *minor*), 0.75 (s, 9H,

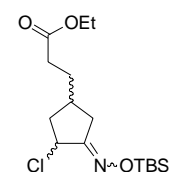

*major*), 0.00 (s, 6H, *major*), -0.01 (s, 6H, *minor*); HRMS-ES  $[M + H]^+$  calcd for  $C_{16}H_{31}ClNO_3Si$ , 348.1762; found, 348.1760.

### 6-Hydroxyiminobicyclo[2.2.1]heptane-2-carboxylic Acid Ethyl

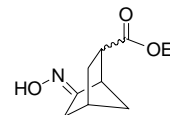

**Ester (12, 13, 14).** To a stirred solution of oxime **11** (20.0 mg, 0.057 mmol) in THF (3 mL) at  $-78\text{ }^{\circ}\text{C}$  was added dropwise KHMDS (0.5 M in toluene, 0.15 mL, 0.068 mmol) via syringe, and the reaction mixture was stirred at  $-78\text{ }^{\circ}\text{C}$  for 1 h. The reaction mixture was diluted with 9 mL of THF. TBAF (1 M in THF, 0.057 mL, 0.057 mmol) was added dropwise via syringe, and the mixture was warmed to rt over 2 h and stirred at rt for 12 h. Saturated aqueous  $\text{NH}_4\text{Cl}$  (5 mL) was then added. The mixture was extracted with ether (10 mL x 3), and the combined extracts were dried over  $\text{Na}_2\text{SO}_4$ . The solvent was removed under reduced pressure and the residue was purified by flash chromatography (50% ether/hexanes) to afford the bridged bicyclic oxime **12, 13, 14** (8:7:10 by NMR integration) as a clear oil (10.9 mg, 99%). One oxime geometric isomer of the *anti* ester **12** or **13** was isolated in pure form, while **14** and the other *anti* isomer **12** or **13** were obtained as an inseparable mixture. More polar isomer (inseparable 2:1 mixture of **14** and **12** or **13**):  $^1\text{H}$  NMR (300 MHz,  $\text{CDCl}_3$ )  $\delta$  7.80 (s, 1H, *major*), 7.69 (s, 1H, *minor*), 4.04-3.93 (m, 2H, *major and minor*), 3.65 (s, 1H, *major*), 2.98-2.96 (m, 1H, *minor*), 2.83-2.76 (m, 1H, *minor*), 2.44-2.40 (m, 2H *major*, 1H *minor*), 2.24-2.01 (m, 2H, *major*), 1.91-1.83 (m, 2H, *major*), 1.71-1.65 (m, 2H, *minor*), 1.56-1.44 (m, 2H, *major and minor*), 1.30-1.26 (m, 2H, *minor*), 1.14-1.07 (m, 3H, *major and minor*);  $^{13}\text{C}$  NMR (75 MHz,  $\text{CDCl}_3$ )  $\delta$  174.7, 173.8, 165.1, 164.4, 61.2, 61.1, 46.7, 45.2, 42.7, 42.2, 40.7, 37.0, 36.5, 35.9, 35.6, 34.6, 32.6, 31.0, 14.6; HRMS-ES  $[M + H]^+$  calcd for  $C_{10}H_{16}NO_3$ , 198.1130; found, 198.1132. Less polar isomer **12** or **13** (single geometrical isomer):  $^1\text{H}$

NMR (300 MHz, CDCl<sub>3</sub>)  $\delta$  7.40 (s, 1H), 3.98 (q,  $J = 7.1$  Hz, 2H), 2.99 (s, 1H), 2.48-2.44 (m, 2H), 2.21-2.13 (m, 1H), 1.97 (dd,  $J = 3.4, 17.6$  Hz, 1H), 1.90-1.82 (m, 1H), 1.56-1.45 (m, 2H), 1.34-1.27(m, 1H), 1.10 (t,  $J = 7.1$  Hz, 3H); <sup>13</sup>C NMR (75 MHz, CDCl<sub>3</sub>)  $\delta$  174.8, 166.4, 61.2, 46.5, 44.0, 37.4, 35.6, 34.5, 33.0, 14.6; HRMS-ES [M + H]<sup>+</sup> calcd for C<sub>10</sub>H<sub>16</sub>NO<sub>3</sub>, 198.1130; found, 198.1134.

# Crystal Structure Information for compound 9

A colorless brick shaped crystal of **9** (C<sub>14</sub> H<sub>22</sub> N O<sub>5</sub>) with approximate dimensions 0.07 x 0.10 x 0.15 mm, was used for the X-ray crystallographic analysis. The X-ray intensity data were measured at 103(2) K, cooled by Rigaku-MSX X-Stream 2000, on a Bruker SMART APEX CCD area detector system equipped with a graphite monochromator and a MoK $\alpha$  fine-focus sealed tube ( $\lambda = 0.71073\text{\AA}$ ) operated at 1600 watts power (50 kV, 32 mA). The detector was placed at a distance of 5.8 cm from the crystal.

A total of 1850 frames were collected with a scan width of  $0.3^\circ$  in  $\omega$  and an exposure time of 40 seconds/frame. The total data collection time was about 24 hours. The frames were integrated with the Bruker SAINT software package using a narrow-frame integration algorithm. The integration of the data using a Monoclinic unit cell yielded a total of 21513 reflections to a maximum  $\theta$  angle of  $28.34^\circ$  ( $0.90\text{\AA}$  resolution), of which 6959 were independent, completeness = 98.1%,  $R_{\text{int}} = 0.0582$ ,  $R_{\text{sig}} = 0.0754$  and 4723 were greater than  $2\sigma(I)$ . The final cell constants:  $a = 12.467(3)\text{\AA}$ ,  $b = 15.301(4)\text{\AA}$ ,  $c = 14.892(4)\text{\AA}$ ,  $\alpha = 90^\circ$ ,  $\beta = 90.615(5)^\circ$ ,  $\gamma = 90^\circ$ , volume =  $2840.6(12)\text{\AA}^3$ , are based upon the refinement of the XYZ-centroids of 7040 reflections above  $20\sigma(I)$  with  $2.501^\circ < \theta < 28.324^\circ$ . Analysis of the data showed negligible decay during data collection. Data were corrected for absorption effects using the multiscan technique (SADABS). The ratio of minimum to maximum apparent transmission was 0.7006.

The structure was solved and refined using the Bruker SHELXTL (Version 6.1) Software Package, using the space group P2(1)/n, with  $Z = 8$  for the formula unit, C<sub>14</sub> H<sub>22</sub> N O<sub>5</sub>. The final anisotropic full-matrix least-squares refinement on  $F^2$  with 367 variables converged at  $R1 = 10.72\%$ , for the observed data and  $wR2 = 24.00\%$  for all data. The goodness-of-fit was 1.193. The largest peak on the final difference map was  $0.569\text{ e}^-/\text{\AA}^3$  and the largest hole was  $-0.580\text{ e}^-/\text{\AA}^3$ . Based on the final model, the calculated density of the crystal is  $1.330\text{ g/cm}^3$  and  $F(000)$  amounts to 1224 electrons.

*Note to users: The small molecule crystallographic facility was established using funds from an NSF Chemistry Research Instrumentation and Facilities grant CHE-0131112.*

**Table 1. Sample and crystal data for 9.**

---

|                          |                                                                                                     |
|--------------------------|-----------------------------------------------------------------------------------------------------|
| Identification code      | 9                                                                                                   |
| Compound number          | IK3-186                                                                                             |
| X-ray lab-book           | IK3                                                                                                 |
| Crystallization lab-book | IK3                                                                                                 |
| Crystallization solvents | CDCl <sub>3</sub>                                                                                   |
| Crystallization method   | slow evaporation                                                                                    |
| Empirical formula        | C <sub>14</sub> H <sub>22</sub> N O <sub>5</sub>                                                    |
| Formula weight           | 284.33                                                                                              |
| Temperature              | 103(2) K                                                                                            |
| Wavelength               | 0.71073 Å                                                                                           |
| Crystal size             | 0.15 x 0.10 x 0.07 mm                                                                               |
| Crystal habit            | colorless brick                                                                                     |
| Crystal system           | Monoclinic                                                                                          |
| Space group              | P2(1)/n                                                                                             |
| Unit cell dimensions     | a = 12.467(3) Å      α = 90°<br>b = 15.301(4) Å      β = 90.615(5)°<br>c = 14.892(4) Å      γ = 90° |
| Volume                   | 2840.6(12) Å <sup>3</sup>                                                                           |
| Z                        | 8                                                                                                   |
| Density (calculated)     | 1.330 g/cm <sup>3</sup>                                                                             |
| Absorption coefficient   | 0.100 mm <sup>-1</sup>                                                                              |
| F(000)                   | 1224                                                                                                |

---

**Table 2. Data collection and structure refinement for 9.**

|                                 |                                                               |
|---------------------------------|---------------------------------------------------------------|
| Diffractometer                  | CCD area detector                                             |
| Radiation source                | fine-focus sealed tube, MoK $\alpha$                          |
| Generator power                 | 1600 watts (50 kV, 32mA)                                      |
| Detector distance               | 5.8 cm                                                        |
| Data collection method          | phi and omega scans                                           |
| Theta range for data collection | 1.91 to 28.34°                                                |
| Index ranges                    | -16 ≤ <i>h</i> ≤ 12, -20 ≤ <i>k</i> ≤ 20, -19 ≤ <i>l</i> ≤ 18 |

**Table 3. Atomic coordinates and equivalent isotropic atomic displacement parameters (Å<sup>2</sup>) for 9.**

U(eq) is defined as one third of the trace of the orthogonalized U<sub>ij</sub> tensor.

|     | x         | y         | z          | U(eq)      |
|-----|-----------|-----------|------------|------------|
| C1  | 0.7571(3) | 0.2316(2) | 0.4429(2)  | 0.0207(8)  |
| C2  | 0.8689(3) | 0.2068(2) | 0.4775(2)  | 0.0193(8)  |
| C3  | 0.8872(3) | 0.1098(3) | 0.4606(3)  | 0.0239(8)  |
| C4  | 0.8040(3) | 0.0520(2) | 0.5075(3)  | 0.0212(8)  |
| C5  | 0.6936(3) | 0.0917(2) | 0.5067(2)  | 0.0160(7)  |
| C6  | 0.6858(3) | 0.1894(2) | 0.5148(2)  | 0.0137(7)  |
| C7  | 0.8629(3) | 0.2288(2) | 0.5784(2)  | 0.0162(7)  |
| C8  | 0.7415(3) | 0.2222(2) | 0.6019(2)  | 0.0123(7)  |
| C9  | 0.6965(3) | 0.3118(2) | 0.6274(2)  | 0.0147(7)  |
| C10 | 0.6987(3) | 0.4168(2) | 0.7458(3)  | 0.0276(9)  |
| C11 | 0.5983(3) | 0.3975(3) | 0.7972(3)  | 0.0317(10) |
| C12 | 0.7184(3) | 0.1640(2) | 0.6823(2)  | 0.0143(7)  |
| C13 | 0.5777(3) | 0.1178(3) | 0.7773(3)  | 0.0271(9)  |
| C14 | 0.4586(3) | 0.1241(3) | 0.7804(3)  | 0.0293(9)  |
| C15 | 0.7762(3) | 0.2222(3) | -0.0484(2) | 0.0230(8)  |
| C16 | 0.8778(3) | 0.1943(2) | 0.0011(2)  | 0.0218(8)  |
| C17 | 0.8957(3) | 0.0969(3) | -0.0131(3) | 0.0251(9)  |
| C18 | 0.8018(3) | 0.0411(2) | 0.0213(3)  | 0.0218(8)  |
| C19 | 0.6950(3) | 0.0843(2) | 0.0077(2)  | 0.0157(7)  |
| C20 | 0.6903(3) | 0.1829(2) | 0.0125(2)  | 0.0168(7)  |
| C21 | 0.8532(3) | 0.2174(2) | 0.0994(2)  | 0.0178(7)  |
| C22 | 0.7285(3) | 0.2156(2) | 0.1059(2)  | 0.0150(7)  |
| C23 | 0.6837(3) | 0.3073(2) | 0.1232(3)  | 0.0188(7)  |
| C24 | 0.6782(3) | 0.4194(2) | 0.2347(3)  | 0.0309(10) |
| C25 | 0.5747(3) | 0.4127(3) | 0.2837(3)  | 0.0323(10) |
| C26 | 0.6855(3) | 0.1580(2) | 0.1810(2)  | 0.0164(7)  |
| C27 | 0.5186(4) | 0.1147(3) | 0.2463(3)  | 0.0322(10) |

|     |             |              |              |           |
|-----|-------------|--------------|--------------|-----------|
| C28 | 0.4774(3)   | 0.1740(3)    | 0.3166(3)    | 0.0281(9) |
| N1  | 0.6063(2)   | 0.04967(19)  | 0.5012(2)    | 0.0194(7) |
| N2  | 0.6066(2)   | 0.04498(18)  | -0.00337(19) | 0.0159(6) |
| O1  | 0.6196(2)   | -0.04165(17) | 0.4923(2)    | 0.0300(7) |
| O2  | 0.61353(19) | 0.16676(16)  | 0.69987(16)  | 0.0177(5) |
| O3  | 0.7821(2)   | 0.12183(16)  | 0.72455(17)  | 0.0222(6) |
| O4  | 0.7407(2)   | 0.33676(16)  | 0.70567(17)  | 0.0207(6) |
| O5  | 0.6313(2)   | 0.35278(16)  | 0.58618(18)  | 0.0227(6) |
| O6  | 0.6172(2)   | -0.04694(16) | -0.00743(19) | 0.0242(6) |
| O7  | 0.7375(2)   | 0.11439(18)  | 0.23114(18)  | 0.0279(6) |
| O8  | 0.5786(2)   | 0.16400(17)  | 0.18027(18)  | 0.0241(6) |
| O9  | 0.6297(2)   | 0.34882(17)  | 0.0724(2)    | 0.0281(6) |
| O10 | 0.7140(2)   | 0.33312(16)  | 0.20516(18)  | 0.0248(6) |

---



**Table 4. Bond lengths (Å) for 9.**

|          |          |          |          |
|----------|----------|----------|----------|
| C1-C2    | 1.529(5) | C1-C6    | 1.541(5) |
| C1-H1B   | 0.9900   | C1-H1C   | 0.9900   |
| C2-C3    | 1.523(5) | C2-C7    | 1.541(5) |
| C2-H2    | 1.0000   | C3-C4    | 1.536(5) |
| C3-H3A   | 0.9900   | C3-H3B   | 0.9900   |
| C4-C5    | 1.505(5) | C4-H4A   | 0.9900   |
| C4-H4B   | 0.9900   | C5-N1    | 1.266(4) |
| C5-C6    | 1.503(5) | C6-C8    | 1.548(4) |
| C6-H6    | 1.0000   | C7-C8    | 1.561(5) |
| C7-H7A   | 0.9900   | C7-H7B   | 0.9900   |
| C8-C12   | 1.521(5) | C8-C9    | 1.531(4) |
| C9-O5    | 1.192(4) | C9-O4    | 1.339(4) |
| C10-O4   | 1.462(4) | C10-C11  | 1.504(6) |
| C10-H10A | 0.9900   | C10-H10B | 0.9900   |
| C11-H11A | 0.9800   | C11-H11B | 0.9800   |
| C11-H11C | 0.9800   | C12-O3   | 1.197(4) |
| C12-O2   | 1.337(4) | C13-O2   | 1.449(4) |
| C13-C14  | 1.490(5) | C13-H13A | 0.9900   |
| C13-H13B | 0.9900   | C14-H14A | 0.9800   |
| C14-H14B | 0.9800   | C14-H14C | 0.9800   |
| C15-C16  | 1.520(5) | C15-C20  | 1.533(5) |
| C15-H15A | 0.9900   | C15-H15B | 0.9900   |
| C16-C17  | 1.522(5) | C16-C21  | 1.541(5) |
| C16-H16  | 1.0000   | C17-C18  | 1.541(5) |
| C17-H17A | 0.9900   | C17-H17B | 0.9900   |
| C18-C19  | 1.499(5) | C18-H18A | 0.9900   |
| C18-H18B | 0.9900   | C19-N2   | 1.266(4) |
| C19-C20  | 1.511(5) | C20-C22  | 1.549(5) |
| C20-H20  | 1.0000   | C21-C22  | 1.559(5) |
| C21-H21A | 0.9900   | C21-H21B | 0.9900   |
| C22-C26  | 1.525(5) | C22-C23  | 1.533(5) |
| C23-O9   | 1.191(4) | C23-O10  | 1.333(5) |
| C24-O10  | 1.462(4) | C24-C25  | 1.493(6) |
| C24-H24A | 0.9900   | C24-H24B | 0.9900   |
| C25-H25A | 0.9800   | C25-H25B | 0.9800   |
| C25-H25C | 0.9800   | C26-O7   | 1.188(4) |
| C26-O8   | 1.336(4) | C27-O8   | 1.454(4) |
| C27-C28  | 1.481(6) | C27-H27A | 0.9900   |
| C27-H27B | 0.9900   | C28-H28A | 0.9800   |
| C28-H28B | 0.9800   | C28-H28C | 0.9800   |
| N1-O1    | 1.414(4) | N1-H1A   | 0.8800   |
| N2-O6    | 1.414(4) | N2-H2A   | 0.8800   |
| O1-H1    | 0.8400   | O6-H6A   | 0.8400   |

Symmetry transformations used to generate equivalent atoms (if any):

**Table 5. Bond angles (°) for 9.**

|               |          |               |          |
|---------------|----------|---------------|----------|
| C2-C1-C6      | 101.1(3) | C2-C1-H1B     | 111.6    |
| C6-C1-H1B     | 111.6    | C2-C1-H1C     | 111.6    |
| C6-C1-H1C     | 111.6    | H1B-C1-H1C    | 109.4    |
| C3-C2-C1      | 108.9(3) | C3-C2-C7      | 112.5(3) |
| C1-C2-C7      | 102.8(3) | C3-C2-H2      | 110.8    |
| C1-C2-H2      | 110.8    | C7-C2-H2      | 110.8    |
| C2-C3-C4      | 112.4(3) | C2-C3-H3A     | 109.1    |
| C4-C3-H3A     | 109.1    | C2-C3-H3B     | 109.1    |
| C4-C3-H3B     | 109.1    | H3A-C3-H3B    | 107.8    |
| C5-C4-C3      | 112.7(3) | C5-C4-H4A     | 109.0    |
| C3-C4-H4A     | 109.0    | C5-C4-H4B     | 109.0    |
| C3-C4-H4B     | 109.0    | H4A-C4-H4B    | 107.8    |
| N1-C5-C6      | 117.0(3) | N1-C5-C4      | 125.6(3) |
| C6-C5-C4      | 117.4(3) | C5-C6-C1      | 108.8(3) |
| C5-C6-C8      | 111.1(3) | C1-C6-C8      | 100.9(3) |
| C5-C6-H6      | 111.8    | C1-C6-H6      | 111.8    |
| C8-C6-H6      | 111.8    | C2-C7-C8      | 105.2(3) |
| C2-C7-H7A     | 110.7    | C8-C7-H7A     | 110.7    |
| C2-C7-H7B     | 110.7    | C8-C7-H7B     | 110.7    |
| H7A-C7-H7B    | 108.8    | C12-C8-C9     | 104.8(3) |
| C12-C8-C6     | 112.5(3) | C9-C8-C6      | 109.6(3) |
| C12-C8-C7     | 114.0(3) | C9-C8-C7      | 110.9(3) |
| C6-C8-C7      | 105.1(3) | O5-C9-O4      | 124.8(3) |
| O5-C9-C8      | 126.4(3) | O4-C9-C8      | 108.9(3) |
| O4-C10-C11    | 110.3(3) | O4-C10-H10A   | 109.6    |
| C11-C10-H10A  | 109.6    | O4-C10-H10B   | 109.6    |
| C11-C10-H10B  | 109.6    | H10A-C10-H10B | 108.1    |
| C10-C11-H11A  | 109.5    | C10-C11-H11B  | 109.5    |
| H11A-C11-H11B | 109.5    | C10-C11-H11C  | 109.5    |
| H11A-C11-H11C | 109.5    | H11B-C11-H11C | 109.5    |
| O3-C12-O2     | 124.0(3) | O3-C12-C8     | 126.8(3) |
| O2-C12-C8     | 109.2(3) | O2-C13-C14    | 107.9(3) |
| O2-C13-H13A   | 110.1    | C14-C13-H13A  | 110.1    |
| O2-C13-H13B   | 110.1    | C14-C13-H13B  | 110.1    |
| H13A-C13-H13B | 108.4    | C13-C14-H14A  | 109.5    |
| C13-C14-H14B  | 109.5    | H14A-C14-H14B | 109.5    |
| C13-C14-H14C  | 109.5    | H14A-C14-H14C | 109.5    |
| H14B-C14-H14C | 109.5    | C16-C15-C20   | 100.8(3) |
| C16-C15-H15A  | 111.6    | C20-C15-H15A  | 111.6    |
| C16-C15-H15B  | 111.6    | C20-C15-H15B  | 111.6    |
| H15A-C15-H15B | 109.4    | C15-C16-C17   | 109.2(3) |
| C15-C16-C21   | 102.9(3) | C17-C16-C21   | 112.8(3) |
| C15-C16-H16   | 110.5    | C17-C16-H16   | 110.5    |
| C21-C16-H16   | 110.5    | C16-C17-C18   | 112.6(3) |

|               |          |               |          |
|---------------|----------|---------------|----------|
| C16-C17-H17A  | 109.1    | C18-C17-H17A  | 109.1    |
| C16-C17-H17B  | 109.1    | C18-C17-H17B  | 109.1    |
| H17A-C17-H17B | 107.8    | C19-C18-C17   | 112.7(3) |
| C19-C18-H18A  | 109.0    | C17-C18-H18A  | 109.0    |
| C19-C18-H18B  | 109.0    | C17-C18-H18B  | 109.0    |
| H18A-C18-H18B | 107.8    | N2-C19-C18    | 125.4(3) |
| N2-C19-C20    | 116.6(3) | C18-C19-C20   | 118.0(3) |
| C19-C20-C15   | 109.6(3) | C19-C20-C22   | 110.7(3) |
| C15-C20-C22   | 101.3(3) | C19-C20-H20   | 111.6    |
| C15-C20-H20   | 111.6    | C22-C20-H20   | 111.6    |
| C16-C21-C22   | 105.3(3) | C16-C21-H21A  | 110.7    |
| C22-C21-H21A  | 110.7    | C16-C21-H21B  | 110.7    |
| C22-C21-H21B  | 110.7    | H21A-C21-H21B | 108.8    |
| C26-C22-C23   | 105.9(3) | C26-C22-C20   | 111.4(3) |
| C23-C22-C20   | 109.7(3) | C26-C22-C21   | 114.5(3) |
| C23-C22-C21   | 111.1(3) | C20-C22-C21   | 104.3(3) |
| O9-C23-O10    | 125.2(3) | O9-C23-C22    | 125.9(3) |
| O10-C23-C22   | 108.9(3) | O10-C24-C25   | 110.7(3) |
| O10-C24-H24A  | 109.5    | C25-C24-H24A  | 109.5    |
| O10-C24-H24B  | 109.5    | C25-C24-H24B  | 109.5    |
| H24A-C24-H24B | 108.1    | C24-C25-H25A  | 109.5    |
| C24-C25-H25B  | 109.5    | H25A-C25-H25B | 109.5    |
| C24-C25-H25C  | 109.5    | H25A-C25-H25C | 109.5    |
| H25B-C25-H25C | 109.5    | O7-C26-O8     | 125.5(3) |
| O7-C26-C22    | 126.2(3) | O8-C26-C22    | 108.2(3) |
| O8-C27-C28    | 110.2(3) | O8-C27-H27A   | 109.6    |
| C28-C27-H27A  | 109.6    | O8-C27-H27B   | 109.6    |
| C28-C27-H27B  | 109.6    | H27A-C27-H27B | 108.1    |
| C27-C28-H28A  | 109.5    | C27-C28-H28B  | 109.5    |
| H28A-C28-H28B | 109.5    | C27-C28-H28C  | 109.5    |
| H28A-C28-H28C | 109.5    | H28B-C28-H28C | 109.5    |
| C5-N1-O1      | 114.0(3) | C5-N1-H1A     | 123.0    |
| O1-N1-H1A     | 123.0    | C19-N2-O6     | 113.4(3) |
| C19-N2-H2A    | 123.3    | O6-N2-H2A     | 123.3    |
| N1-O1-H1      | 109.5    | C12-O2-C13    | 116.7(3) |
| C9-O4-C10     | 116.7(3) | N2-O6-H6A     | 109.5    |
| C26-O8-C27    | 118.7(3) | C23-O10-C24   | 117.3(3) |

---

Symmetry transformations used to generate equivalent atoms (if any):

**Table 6. Torsion angles (°) for 9.**

|                 |           |                 |           |
|-----------------|-----------|-----------------|-----------|
| C6-C1-C2-C3     | 73.3(3)   | C6-C1-C2-C7     | -46.2(3)  |
| C1-C2-C3-C4     | -59.5(4)  | C7-C2-C3-C4     | 53.8(4)   |
| C2-C3-C4-C5     | 37.3(4)   | C3-C4-C5-N1     | 146.0(4)  |
| C3-C4-C5-C6     | -35.3(4)  | N1-C5-C6-C1     | -128.4(3) |
| C4-C5-C6-C1     | 52.8(4)   | N1-C5-C6-C8     | 121.3(3)  |
| C4-C5-C6-C8     | -57.5(4)  | C2-C1-C6-C5     | -68.5(3)  |
| C2-C1-C6-C8     | 48.5(3)   | C3-C2-C7-C8     | -91.4(3)  |
| C1-C2-C7-C8     | 25.6(3)   | C5-C6-C8-C12    | -41.7(4)  |
| C1-C6-C8-C12    | -157.0(3) | C5-C6-C8-C9     | -157.9(3) |
| C1-C6-C8-C9     | 86.9(3)   | C5-C6-C8-C7     | 82.9(3)   |
| C1-C6-C8-C7     | -32.4(3)  | C2-C7-C8-C12    | 128.1(3)  |
| C2-C7-C8-C9     | -113.9(3) | C2-C7-C8-C6     | 4.4(3)    |
| C12-C8-C9-O5    | -123.4(4) | C6-C8-C9-O5     | -2.4(5)   |
| C7-C8-C9-O5     | 113.2(4)  | C12-C8-C9-O4    | 55.3(3)   |
| C6-C8-C9-O4     | 176.3(3)  | C7-C8-C9-O4     | -68.2(3)  |
| C9-C8-C12-O3    | -124.8(4) | C6-C8-C12-O3    | 116.2(4)  |
| C7-C8-C12-O3    | -3.4(5)   | C9-C8-C12-O2    | 55.0(3)   |
| C6-C8-C12-O2    | -64.0(3)  | C7-C8-C12-O2    | 176.5(3)  |
| C20-C15-C16-C17 | 73.8(4)   | C20-C15-C16-C21 | -46.3(3)  |
| C15-C16-C17-C18 | -59.5(4)  | C21-C16-C17-C18 | 54.3(4)   |
| C16-C17-C18-C19 | 35.5(4)   | C17-C18-C19-N2  | 151.5(3)  |
| C17-C18-C19-C20 | -32.2(4)  | N2-C19-C20-C15  | -132.8(3) |
| C18-C19-C20-C15 | 50.5(4)   | N2-C19-C20-C22  | 116.3(3)  |
| C18-C19-C20-C22 | -60.3(4)  | C16-C15-C20-C19 | -67.7(3)  |
| C16-C15-C20-C22 | 49.3(3)   | C15-C16-C21-C22 | 25.3(4)   |
| C17-C16-C21-C22 | -92.3(3)  | C19-C20-C22-C26 | -41.1(4)  |
| C15-C20-C22-C26 | -157.2(3) | C19-C20-C22-C23 | -158.0(3) |
| C15-C20-C22-C23 | 85.9(3)   | C19-C20-C22-C21 | 82.9(3)   |
| C15-C20-C22-C21 | -33.2(3)  | C16-C21-C22-C26 | 127.1(3)  |
| C16-C21-C22-C23 | -113.0(3) | C16-C21-C22-C20 | 5.1(4)    |
| C26-C22-C23-O9  | -122.0(4) | C20-C22-C23-O9  | -1.7(5)   |
| C21-C22-C23-O9  | 113.2(4)  | C26-C22-C23-O10 | 57.4(3)   |
| C20-C22-C23-O10 | 177.7(3)  | C21-C22-C23-O10 | -67.5(4)  |
| C23-C22-C26-O7  | -124.9(4) | C20-C22-C26-O7  | 116.0(4)  |
| C21-C22-C26-O7  | -2.1(5)   | C23-C22-C26-O8  | 55.8(3)   |
| C20-C22-C26-O8  | -63.4(3)  | C21-C22-C26-O8  | 178.5(3)  |
| C6-C5-N1-O1     | 179.0(3)  | C4-C5-N1-O1     | -2.2(5)   |
| C18-C19-N2-O6   | -3.7(5)   | C20-C19-N2-O6   | 179.9(3)  |
| O3-C12-O2-C13   | 2.5(5)    | C8-C12-O2-C13   | -177.4(3) |
| C14-C13-O2-C12  | -175.7(3) | O5-C9-O4-C10    | 5.1(5)    |
| C8-C9-O4-C10    | -173.6(3) | C11-C10-O4-C9   | 82.7(4)   |
| O7-C26-O8-C27   | 0.8(5)    | C22-C26-O8-C27  | -179.9(3) |
| C28-C27-O8-C26  | 105.8(4)  | O9-C23-O10-C24  | -0.2(5)   |
| C22-C23-O10-C24 | -179.6(3) | C25-C24-O10-C23 | 91.9(4)   |

---

Symmetry transformations used to generate equivalent atoms (if any):

**Table 7. Anisotropic atomic displacement parameters ( $\text{\AA}^2$ ) for 9.**

The anisotropic atomic displacement factor exponent takes the form:  $-2\pi^2 [ h^2a^{*2} U_{11} + \dots + 2hka^* b^* U_{12} ]$

|     | $U_{11}$<br>$U_{12}$      | $U_{22}$   | $U_{33}$   | $U_{23}$    | $U_{13}$    |
|-----|---------------------------|------------|------------|-------------|-------------|
| C1  | 0.0219(19)<br>-0.0067(15) | 0.0230(19) | 0.0173(18) | 0.0035(14)  | -0.0020(14) |
| C2  | 0.0192(18)<br>-0.0097(14) | 0.0242(19) | 0.0145(17) | -0.0001(14) | 0.0036(14)  |
| C3  | 0.0198(19)<br>-0.0024(16) | 0.029(2)   | 0.023(2)   | -0.0083(16) | 0.0036(15)  |
| C4  | 0.0217(19)<br>-0.0003(14) | 0.0140(17) | 0.028(2)   | -0.0057(15) | -0.0011(15) |
| C5  | 0.0181(17)<br>-0.0010(14) | 0.0165(17) | 0.0133(17) | -0.0025(13) | -0.0014(13) |
| C6  | 0.0120(16)<br>-0.0015(12) | 0.0147(16) | 0.0145(17) | -0.0008(13) | -0.0018(13) |
| C7  | 0.0154(17)<br>-0.0033(13) | 0.0160(17) | 0.0171(18) | -0.0011(13) | 0.0025(13)  |
| C8  | 0.0108(15)<br>0.0010(12)  | 0.0107(15) | 0.0154(17) | -0.0008(12) | 0.0000(12)  |
| C9  | 0.0159(16)<br>-0.0053(12) | 0.0077(15) | 0.0206(18) | 0.0037(13)  | 0.0061(14)  |
| C10 | 0.030(2)<br>0.0026(16)    | 0.0162(18) | 0.037(2)   | -0.0125(17) | 0.0026(17)  |
| C11 | 0.028(2)<br>0.0050(17)    | 0.031(2)   | 0.036(2)   | -0.0117(19) | 0.0026(18)  |
| C12 | 0.0172(16)<br>-0.0021(13) | 0.0094(15) | 0.0162(17) | -0.0044(13) | 0.0006(13)  |
| C13 | 0.028(2)<br>-0.0093(17)   | 0.029(2)   | 0.025(2)   | 0.0155(17)  | -0.0014(16) |
| C14 | 0.028(2)<br>0.0009(17)    | 0.032(2)   | 0.028(2)   | 0.0120(18)  | 0.0098(17)  |
| C15 | 0.0206(19)<br>-0.0101(16) | 0.031(2)   | 0.0171(18) | 0.0029(15)  | 0.0016(14)  |
| C16 | 0.0156(17)<br>-0.0099(15) | 0.027(2)   | 0.023(2)   | -0.0056(15) | 0.0053(15)  |
| C17 | 0.0189(18)<br>-0.0018(15) | 0.028(2)   | 0.028(2)   | -0.0166(17) | 0.0077(15)  |
| C18 | 0.0186(18)<br>-0.0012(14) | 0.0206(19) | 0.026(2)   | -0.0099(15) | 0.0029(15)  |
| C19 | 0.0178(17)<br>-0.0016(14) | 0.0197(17) | 0.0096(16) | -0.0028(13) | 0.0020(13)  |
| C20 | 0.0142(16)                | 0.0194(18) | 0.0166(18) | 0.0025(14)  | 0.0006(13)  |

|     |             |            |            |             |             |
|-----|-------------|------------|------------|-------------|-------------|
|     | -0.0030(13) |            |            |             |             |
| C21 | 0.0129(16)  | 0.0177(17) | 0.0226(19) | -0.0057(14) | -0.0004(14) |
|     | -0.0018(13) |            |            |             |             |
| C22 | 0.0162(17)  | 0.0138(16) | 0.0150(17) | -0.0018(13) | 0.0011(13)  |
|     | 0.0006(13)  |            |            |             |             |
| C23 | 0.0143(16)  | 0.0146(17) | 0.028(2)   | 0.0006(15)  | 0.0065(14)  |
|     | -0.0029(13) |            |            |             |             |
| C24 | 0.037(2)    | 0.0113(18) | 0.045(3)   | -0.0102(17) | 0.0109(19)  |
|     | 0.0021(16)  |            |            |             |             |
| C25 | 0.029(2)    | 0.023(2)   | 0.045(3)   | -0.0140(19) | 0.0018(19)  |
|     | 0.0048(17)  |            |            |             |             |
| C26 | 0.0270(19)  | 0.0078(15) | 0.0144(17) | -0.0049(13) | 0.0048(14)  |
|     | 0.0017(13)  |            |            |             |             |
| C27 | 0.039(2)    | 0.0173(19) | 0.041(3)   | 0.0084(17)  | 0.016(2)    |
|     | -0.0060(17) |            |            |             |             |
| C28 | 0.027(2)    | 0.036(2)   | 0.021(2)   | 0.0050(17)  | 0.0044(16)  |
|     | -0.0019(17) |            |            |             |             |
| N1  | 0.0184(15)  | 0.0133(14) | 0.0267(17) | -0.0038(12) | 0.0008(13)  |
|     | 0.0013(12)  |            |            |             |             |
| N2  | 0.0157(14)  | 0.0148(14) | 0.0173(15) | 0.0007(11)  | 0.0008(11)  |
|     | -0.0010(11) |            |            |             |             |
| O1  | 0.0257(15)  | 0.0150(13) | 0.0492(19) | -0.0048(12) | 0.0005(13)  |
|     | -0.0056(11) |            |            |             |             |
| O2  | 0.0185(12)  | 0.0181(12) | 0.0165(13) | 0.0089(10)  | 0.0010(10)  |
|     | -0.0014(10) |            |            |             |             |
| O3  | 0.0231(13)  | 0.0181(13) | 0.0254(14) | 0.0052(11)  | -0.0012(11) |
|     | 0.0033(11)  |            |            |             |             |
| O4  | 0.0248(13)  | 0.0129(12) | 0.0243(14) | -0.0074(10) | -0.0002(11) |
|     | 0.0004(10)  |            |            |             |             |
| O5  | 0.0228(13)  | 0.0146(13) | 0.0306(15) | 0.0059(11)  | -0.0010(11) |
|     | 0.0021(10)  |            |            |             |             |
| O6  | 0.0214(13)  | 0.0146(13) | 0.0367(16) | -0.0038(11) | 0.0046(12)  |
|     | -0.0054(10) |            |            |             |             |
| O7  | 0.0384(16)  | 0.0238(14) | 0.0214(14) | 0.0053(11)  | -0.0027(12) |
|     | 0.0066(12)  |            |            |             |             |
| O8  | 0.0242(14)  | 0.0185(13) | 0.0300(15) | 0.0066(11)  | 0.0129(11)  |
|     | 0.0022(11)  |            |            |             |             |
| O9  | 0.0268(15)  | 0.0152(13) | 0.0424(17) | 0.0065(12)  | -0.0027(13) |
|     | 0.0014(11)  |            |            |             |             |
| O10 | 0.0310(15)  | 0.0140(13) | 0.0294(15) | -0.0067(11) | 0.0044(12)  |
|     | 0.0026(11)  |            |            |             |             |

---



**Table 8. Hydrogen atom coordinates and isotropic atomic displacement parameters ( $\text{\AA}^2$ ) for **9**.**

|      | x/a    | y/b     | z/c     | U     |
|------|--------|---------|---------|-------|
| H1B  | 0.7425 | 0.2067  | 0.3827  | 0.025 |
| H1C  | 0.7474 | 0.2958  | 0.4407  | 0.025 |
| H2   | 0.9251 | 0.2427  | 0.4477  | 0.023 |
| H3A  | 0.9598 | 0.0936  | 0.4823  | 0.029 |
| H3B  | 0.8839 | 0.0986  | 0.3951  | 0.029 |
| H4A  | 0.8011 | -0.0056 | 0.4773  | 0.025 |
| H4B  | 0.8272 | 0.0423  | 0.5705  | 0.025 |
| H6   | 0.6099 | 0.2101  | 0.5102  | 0.016 |
| H7A  | 0.8903 | 0.2885  | 0.5901  | 0.019 |
| H7B  | 0.9057 | 0.1867  | 0.6143  | 0.019 |
| H10A | 0.6827 | 0.4600  | 0.6980  | 0.033 |
| H10B | 0.7533 | 0.4424  | 0.7868  | 0.033 |
| H11A | 0.5437 | 0.3733  | 0.7563  | 0.048 |
| H11B | 0.5713 | 0.4515  | 0.8241  | 0.048 |
| H11C | 0.6143 | 0.3550  | 0.8447  | 0.048 |
| H13A | 0.6098 | 0.1424  | 0.8329  | 0.032 |
| H13B | 0.6000 | 0.0560  | 0.7722  | 0.032 |
| H14A | 0.4375 | 0.1853  | 0.7882  | 0.044 |
| H14B | 0.4321 | 0.0894  | 0.8308  | 0.044 |
| H14C | 0.4277 | 0.1017  | 0.7241  | 0.044 |
| H15A | 0.7725 | 0.1972  | -0.1097 | 0.028 |
| H15B | 0.7701 | 0.2866  | -0.0520 | 0.028 |
| H16  | 0.9409 | 0.2285  | -0.0205 | 0.026 |
| H17A | 0.9624 | 0.0791  | 0.0185  | 0.030 |
| H17B | 0.9053 | 0.0856  | -0.0780 | 0.030 |
| H18A | 0.8017 | -0.0158 | -0.0105 | 0.026 |
| H18B | 0.8129 | 0.0293  | 0.0861  | 0.026 |
| H20  | 0.6172 | 0.2054  | -0.0031 | 0.020 |
| H21A | 0.8814 | 0.2761  | 0.1147  | 0.021 |
| H21B | 0.8859 | 0.1741  | 0.1408  | 0.021 |
| H24A | 0.6687 | 0.4580  | 0.1818  | 0.037 |
| H24B | 0.7334 | 0.4456  | 0.2745  | 0.037 |
| H25A | 0.5185 | 0.3914  | 0.2427  | 0.048 |
| H25B | 0.5547 | 0.4704  | 0.3066  | 0.048 |
| H25C | 0.5829 | 0.3719  | 0.3341  | 0.048 |
| H27A | 0.5656 | 0.0699  | 0.2742  | 0.039 |
| H27B | 0.4578 | 0.0844  | 0.2164  | 0.039 |
| H28A | 0.5378 | 0.2000  | 0.3497  | 0.042 |
| H28B | 0.4326 | 0.1408  | 0.3582  | 0.042 |
| H28C | 0.4345 | 0.2204  | 0.2885  | 0.042 |
| H1A  | 0.5430 | 0.0750  | 0.5029  | 0.023 |

|     |        |         |         |       |
|-----|--------|---------|---------|-------|
| H2A | 0.5445 | 0.0721  | -0.0080 | 0.019 |
| H1  | 0.5592 | -0.0656 | 0.4874  | 0.045 |
| H6A | 0.5561 | -0.0701 | -0.0067 | 0.036 |

---

**Figure 1: Ortep Diagram of X-ray Diffraction Structure of 9.**

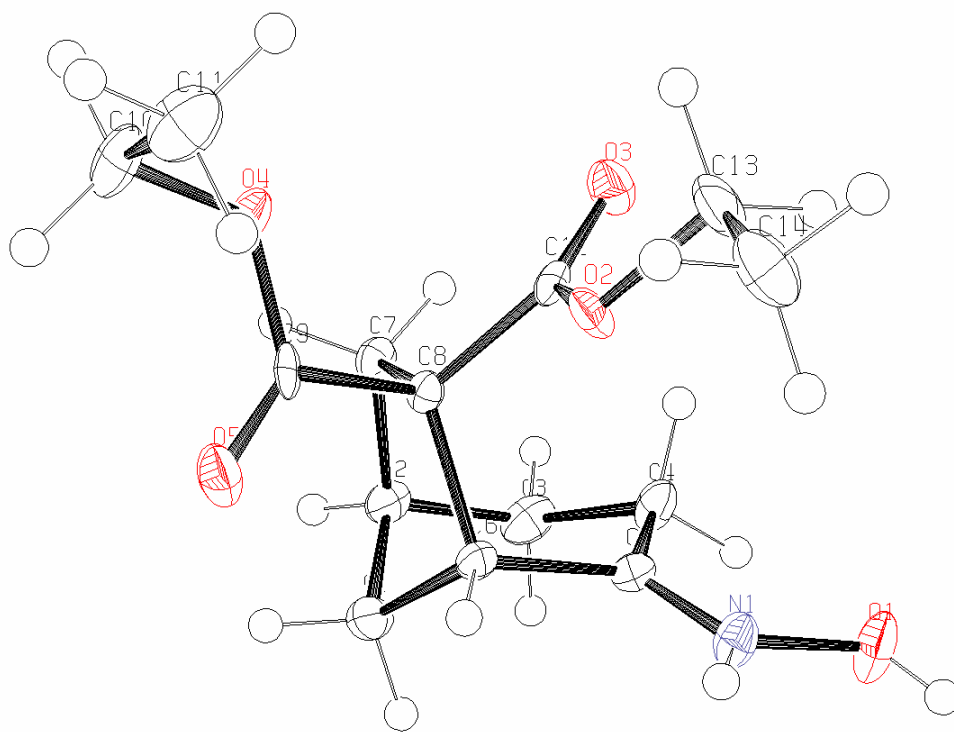

ppm

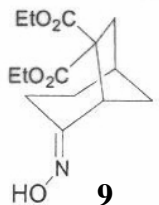

8.24460  
7.54458  
7.28514  
7.02128  
6.99750  
5.32083  
5.13745  
4.22955  
4.21173  
4.18215  
4.17031  
4.16429  
4.15978  
4.15304  
4.14617  
4.14195  
4.13535  
3.49576  
3.48493  
2.62732  
2.62356  
2.59067  
2.58682  
2.29176  
1.65665  
1.62856  
1.27277  
1.25488  
1.23712  
1.22947  
1.21171  
1.19394  
0.90139

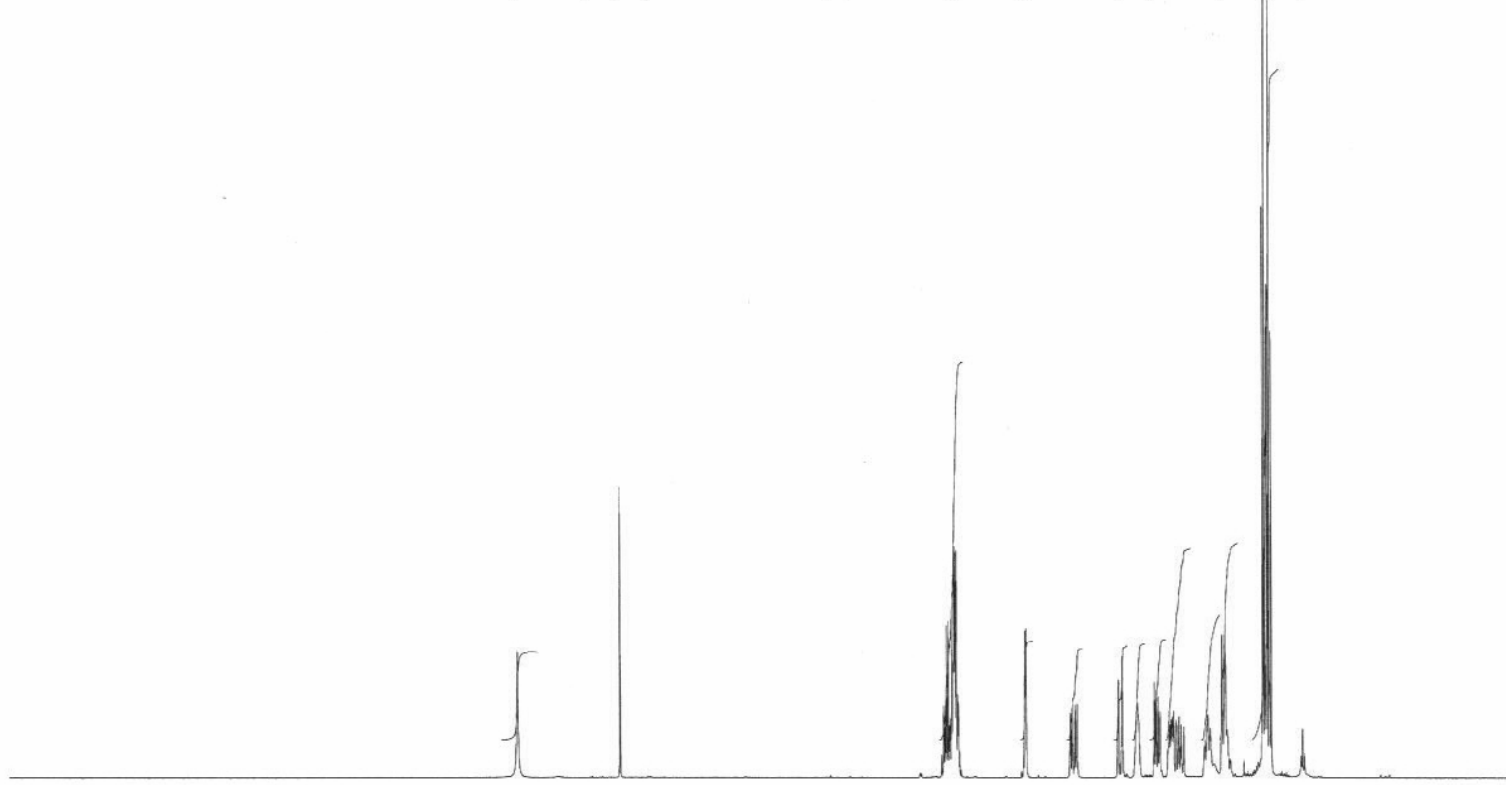

Integral

ppm 12 10 8 6 4 2 0

S51

Current Data Parameters  
NAME ik3-166  
EXPNO 1  
PROCNO 1

F2 - Acquisition Parameters  
Date\_ 20070329  
Time 10.40  
INSTRUM spect  
PROBHD 5 mm BBI 1H-B  
PULPROG zg30  
TD 65536  
SOLVENT CDC13  
NS 16  
DS 2  
SWH 8278.146 Hz  
FIDRES 0.126314 Hz  
AQ 3.9584243 sec  
RG 203.2  
DW 60.400 usec  
DE 6.00 usec  
TE 300.0 K  
D1 1.00000000 sec

===== CHANNEL f1 =====  
NUC1 1H  
P1 6.45 usec  
PL1 0.00 dB  
SFO1 400.1324710 MHz

F2 - Processing parameters  
SI 32768  
SF 400.1300000 MHz  
WDW no  
SSB 0  
LB 0.00 Hz  
GB 0  
PC 1.00

1D NMR plot parameters  
CX 20.00 cm  
F1P 13.000 ppm  
F1 5201.69 Hz  
F2P -1.000 ppm  
F2 -400.13 Hz  
PPMCM 0.70000 ppm/cm  
HZCM 280.09100 Hz/cm

ppm

171.985  
170.187  
159.791

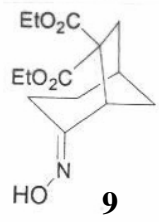

77.741  
77.630  
77.423  
77.105  
63.477  
62.086  
61.946  
49.355  
38.282  
36.316  
34.377  
30.382  
18.424  
14.433  
14.388

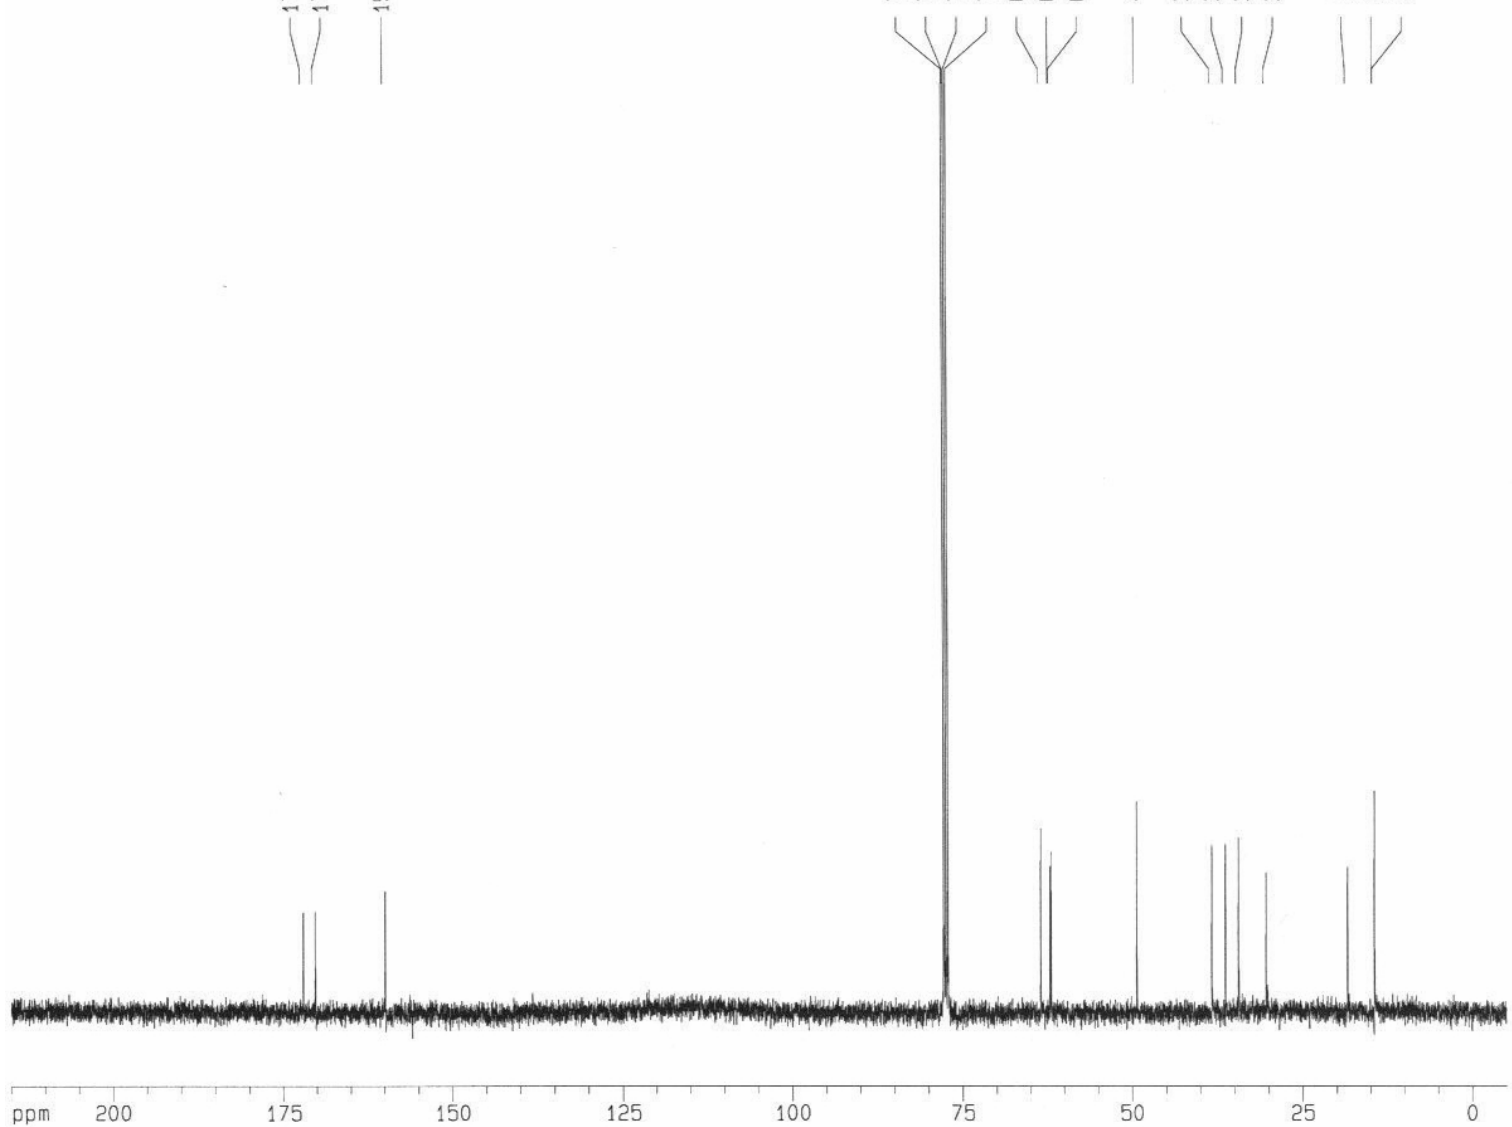

S52

Current Data Parameters  
 NAME ik3-166  
 EXPNO 2  
 PROCNO 1

F2 - Acquisition Parameters  
 Date\_ 20070329  
 Time 10.48  
 INSTRUM spect  
 PROBHD 5 mm BBI 1H-8  
 PULPROG zgpg30  
 TD 65536  
 SOLVENT CDCl3  
 NS 1024  
 DS 4  
 SWH 25125.629 Hz  
 FIDRES 0.383387 Hz  
 AQ 1.3042164 sec  
 RG 5160.6  
 DW 19.900 usec  
 DE 6.00 usec  
 TE 300.0 K  
 D1 2.0000000 sec  
 d11 0.0300000 sec  
 d12 0.0000200 sec

==== CHANNEL f1 =====  
 NUC1 13C  
 P1 16.35 usec  
 PL1 -6.00 dB  
 SFO1 100.6237959 MHz

==== CHANNEL f2 =====  
 CPDPRG2 waltz16  
 NUC2 1H  
 PCPD2 114.00 usec  
 PL2 0.00 dB  
 PL12 24.00 dB  
 PL13 24.00 dB  
 SFO2 400.1316005 MHz

F2 - Processing parameters  
 SI 32768  
 SF 100.6127290 MHz  
 WDW EM  
 SSB 0  
 LB 1.00 Hz  
 GB 0  
 PC 1.40

1D NMR plot parameters  
 CX 20.00 cm  
 F1P 215.000 ppm  
 F1 21631.74 Hz  
 F2P -5.000 ppm  
 F2 -503.06 Hz  
 PPMCM 11.00000 ppm/cm  
 HZCM 1106.73999 Hz/cm

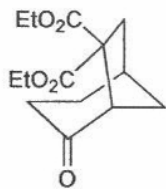

10

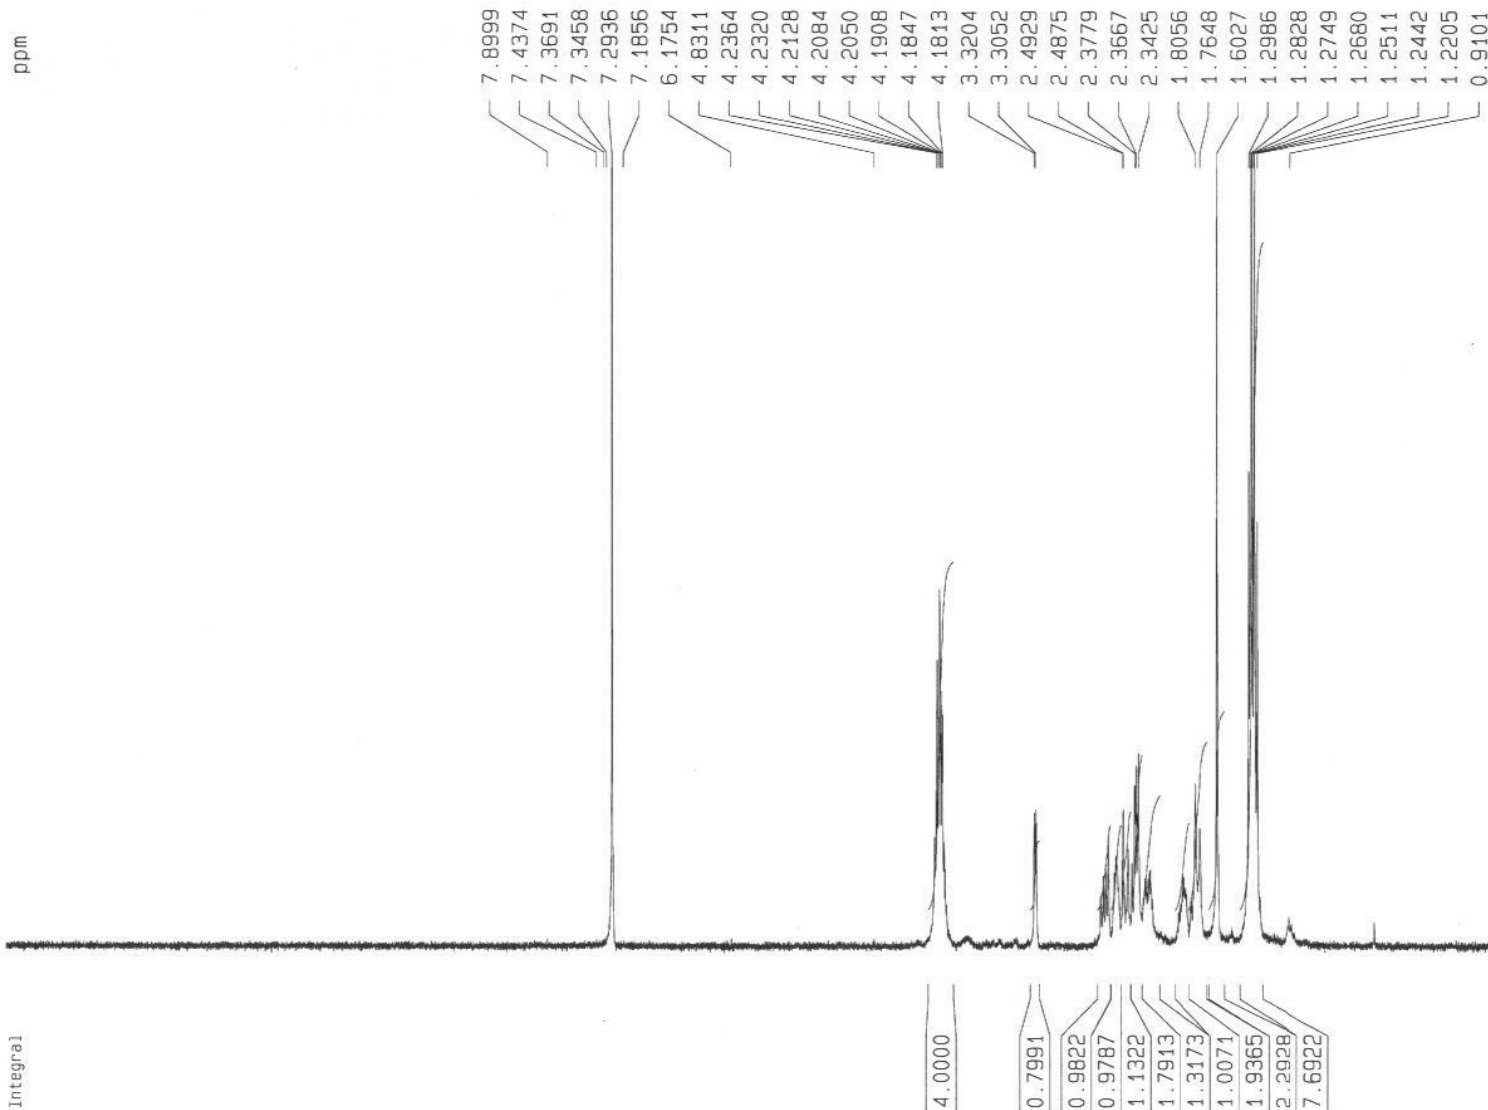

Current Data Parameters

NAME ik4-15  
EXPNO 1  
PROCNO 1

F2 - Acquisition Parameters

Date\_ 20070510  
Time 14.15  
INSTRUM spect  
PROBHD 5 mm GNP 1H/1  
PULPROG zg30  
TD 65536  
SOLVENT CDCl3  
NS 16  
DS 2  
SWH 6172.839 Hz  
FIDRES 0.094190 Hz  
AQ 5.3084660 sec  
RG 912.3  
DW 81.000 usec  
DE 6.00 usec  
TE 300.0 K  
D1 1.0000000 sec

===== CHANNEL f1 =====

NUC1 1H  
P1 11.70 usec  
PL1 0.00 dB  
SFO1 299.8718518 MHz

F2 - Processing parameters

SI 32768  
SF 299.8700000 MHz  
WDW no  
SSB 0  
LB 0.00 Hz  
GB 0  
PC 1.00

1D NMR plot parameters

CX 20.00 cm  
F1P 13.000 ppm  
F1 3898.31 Hz  
F2P -1.000 ppm  
F2 -299.87 Hz  
PPMCM 0.70000 ppm/cm  
HZCM 209.90900 Hz/cm

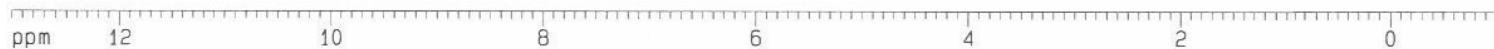

S53

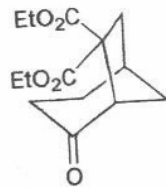

10

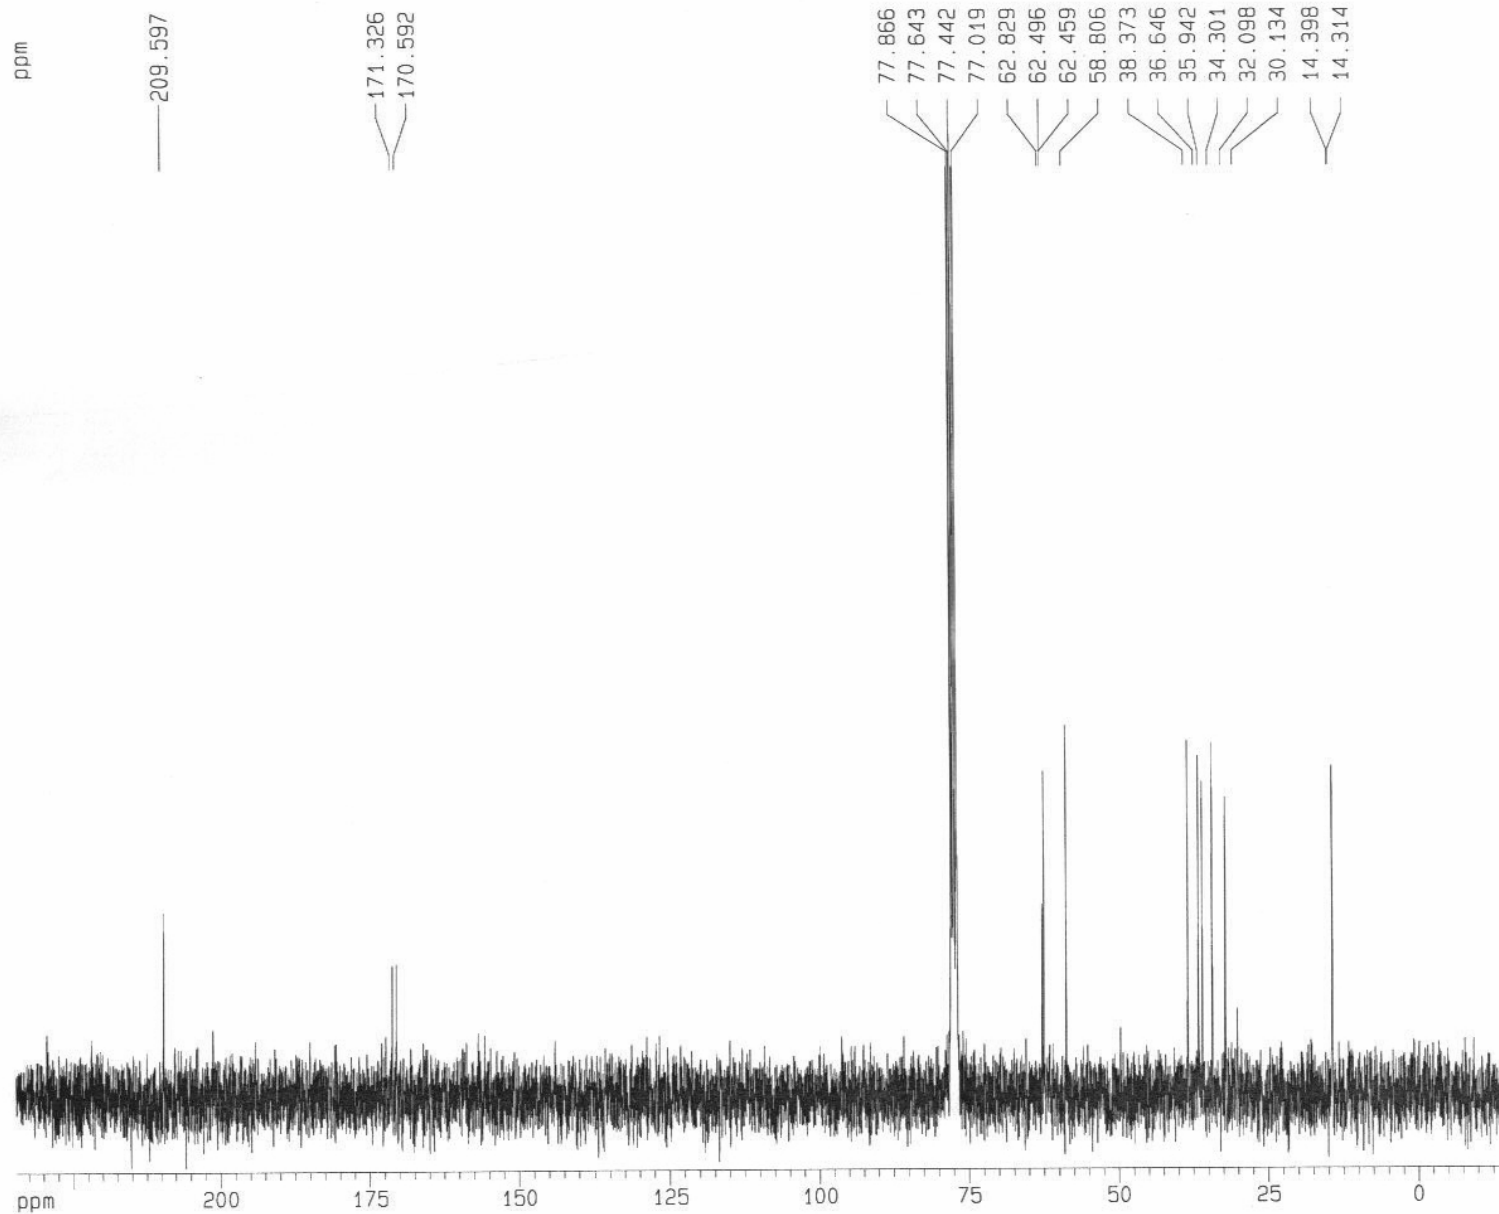

Current Data Parameters  
 NAME ik4-15  
 EXPNO 3  
 PROCNO 1

F2 - Acquisition Parameters  
 Date\_ 20070510  
 Time 17.10  
 INSTRUM spect  
 PROBHD 5 mm GNP 1H/1  
 PULPROG zgpg30  
 TD 65536  
 SOLVENT CDC13  
 NS 1621  
 DS 4  
 SWH 18796.992 Hz  
 FIDRES 0.286819 Hz  
 AQ 1.7433076 sec  
 RG 1024  
 DW 26.600 usec  
 DE 6.00 usec  
 TE 300.0 K  
 D1 2.00000000 sec  
 D11 0.03000000 sec  
 D12 0.00002000 sec

----- CHANNEL f1 -----  
 NUC1 13C  
 P1 5.40 usec  
 PL1 -6.00 dB  
 SF01 75.4106357 MHz

----- CHANNEL f2 -----  
 CPDPRG2 waltz16  
 NUC2 1H  
 PCPD2 115.00 usec  
 PL2 0.00 dB  
 PL12 20.00 dB  
 PL13 20.00 dB  
 SF02 299.8711995 MHz

F2 - Processing parameters  
 SI 32768  
 SF 75.4023410 MHz  
 WDW EM  
 SSB 0  
 LB 1.00 Hz  
 GB 0  
 PC 1.40

1D NMR plot parameters  
 CX 20.00 cm  
 F1P 234.651 ppm  
 F1 17693.24 Hz  
 F2P -14.638 ppm  
 F2 -1103.75 Hz  
 PPMCM 12.46446 ppm/cm  
 HZCM 939.84967 Hz/cm

S54

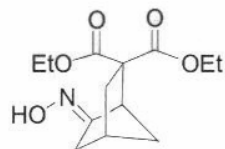

27

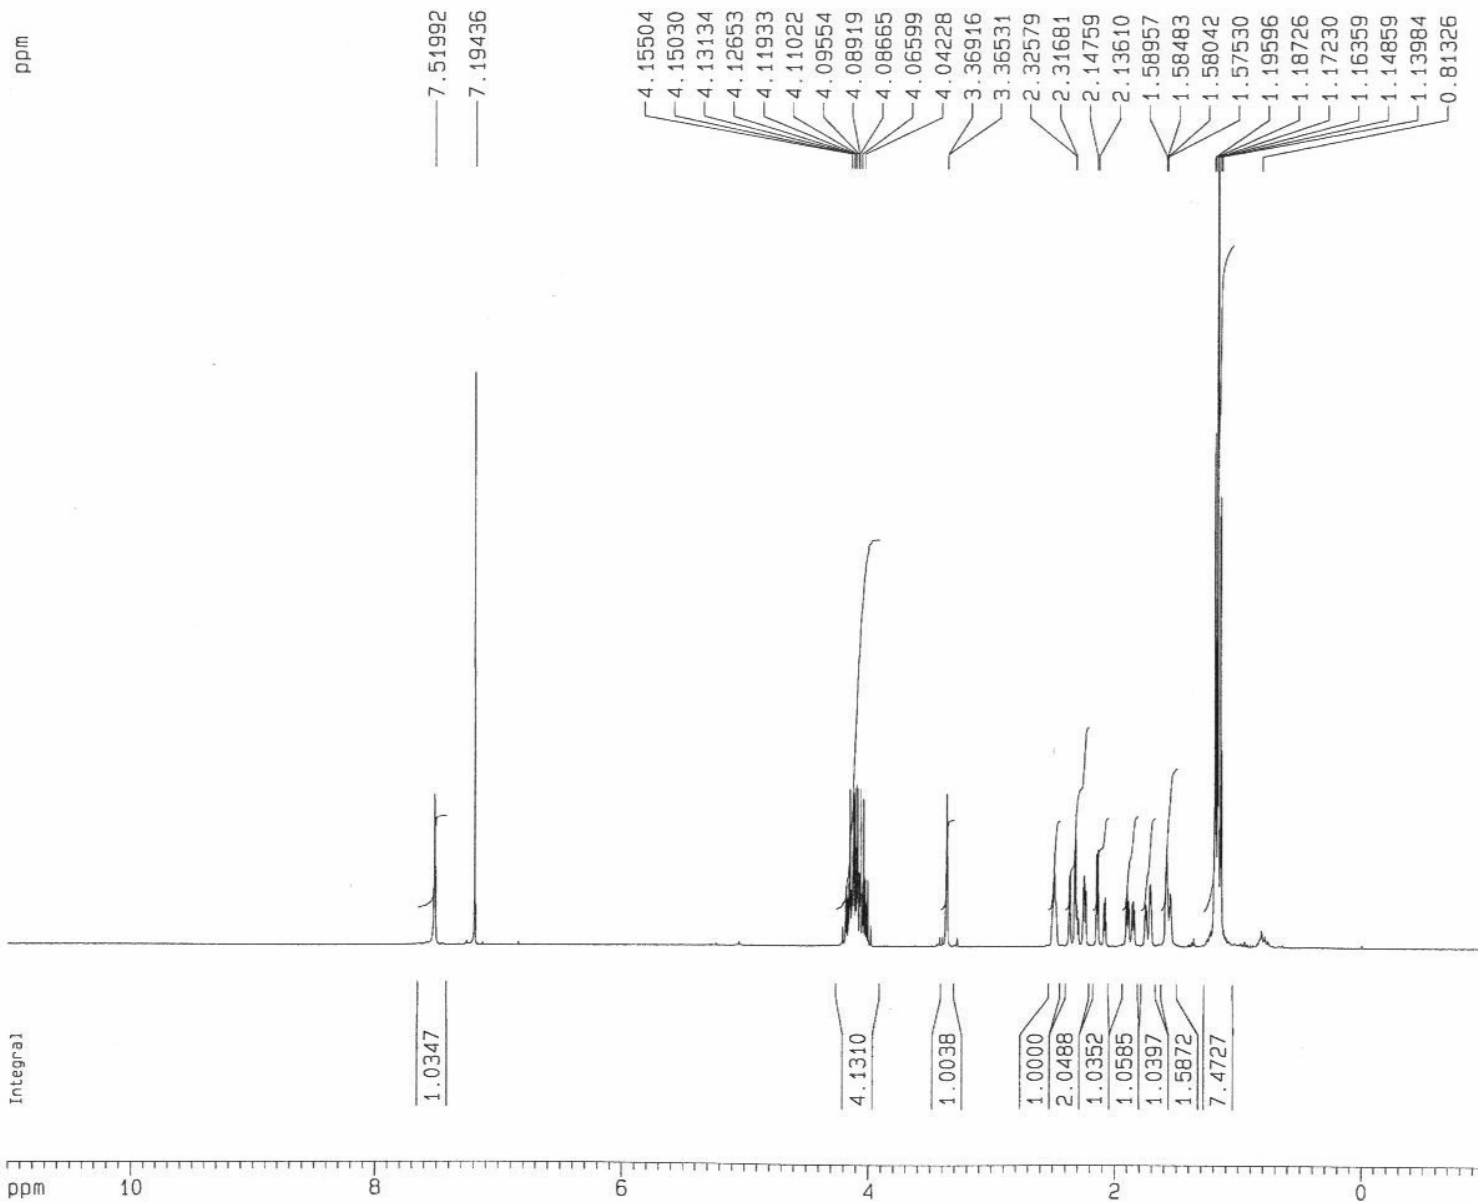

Current Data Parameters  
 NAME May05-2007-Wein  
 EXPNO 20  
 PROCNO 1

F2 - Acquisition Parameters  
 Date\_ 20070505  
 Time 23.12  
 INSTRUM spect  
 PROBHD 5 mm Multinu  
 PULPROG zg30  
 TD 65536  
 SOLVENT CDC13  
 NS 128  
 DS 0  
 SWH 6172.839 Hz  
 FIDRES 0.094190 Hz  
 AQ 5.3084660 sec  
 RG 645.1  
 DW 81.000 usec  
 DE 6.00 usec  
 TE 300.0 K  
 D1 2.00000000 sec

----- CHANNEL f1 -----  
 NUC1 1H  
 P1 9.60 usec  
 PL1 -6.00 dB  
 SF01 300.1318534 MHz

F2 - Processing parameters  
 SI 32768  
 SF 300.1300261 MHz  
 WDW EM  
 SSB 0  
 LB 0.30 Hz  
 GB 0  
 PC 1.00

1D NMR plot parameters  
 CX 20.00 cm  
 F1P 11.000 ppm  
 F1 3301.43 Hz  
 F2P -1.000 ppm  
 F2 -300.13 Hz  
 PPMCM 0.60000 ppm/cm  
 HZCM 180.07802 Hz/cm

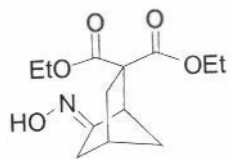

27

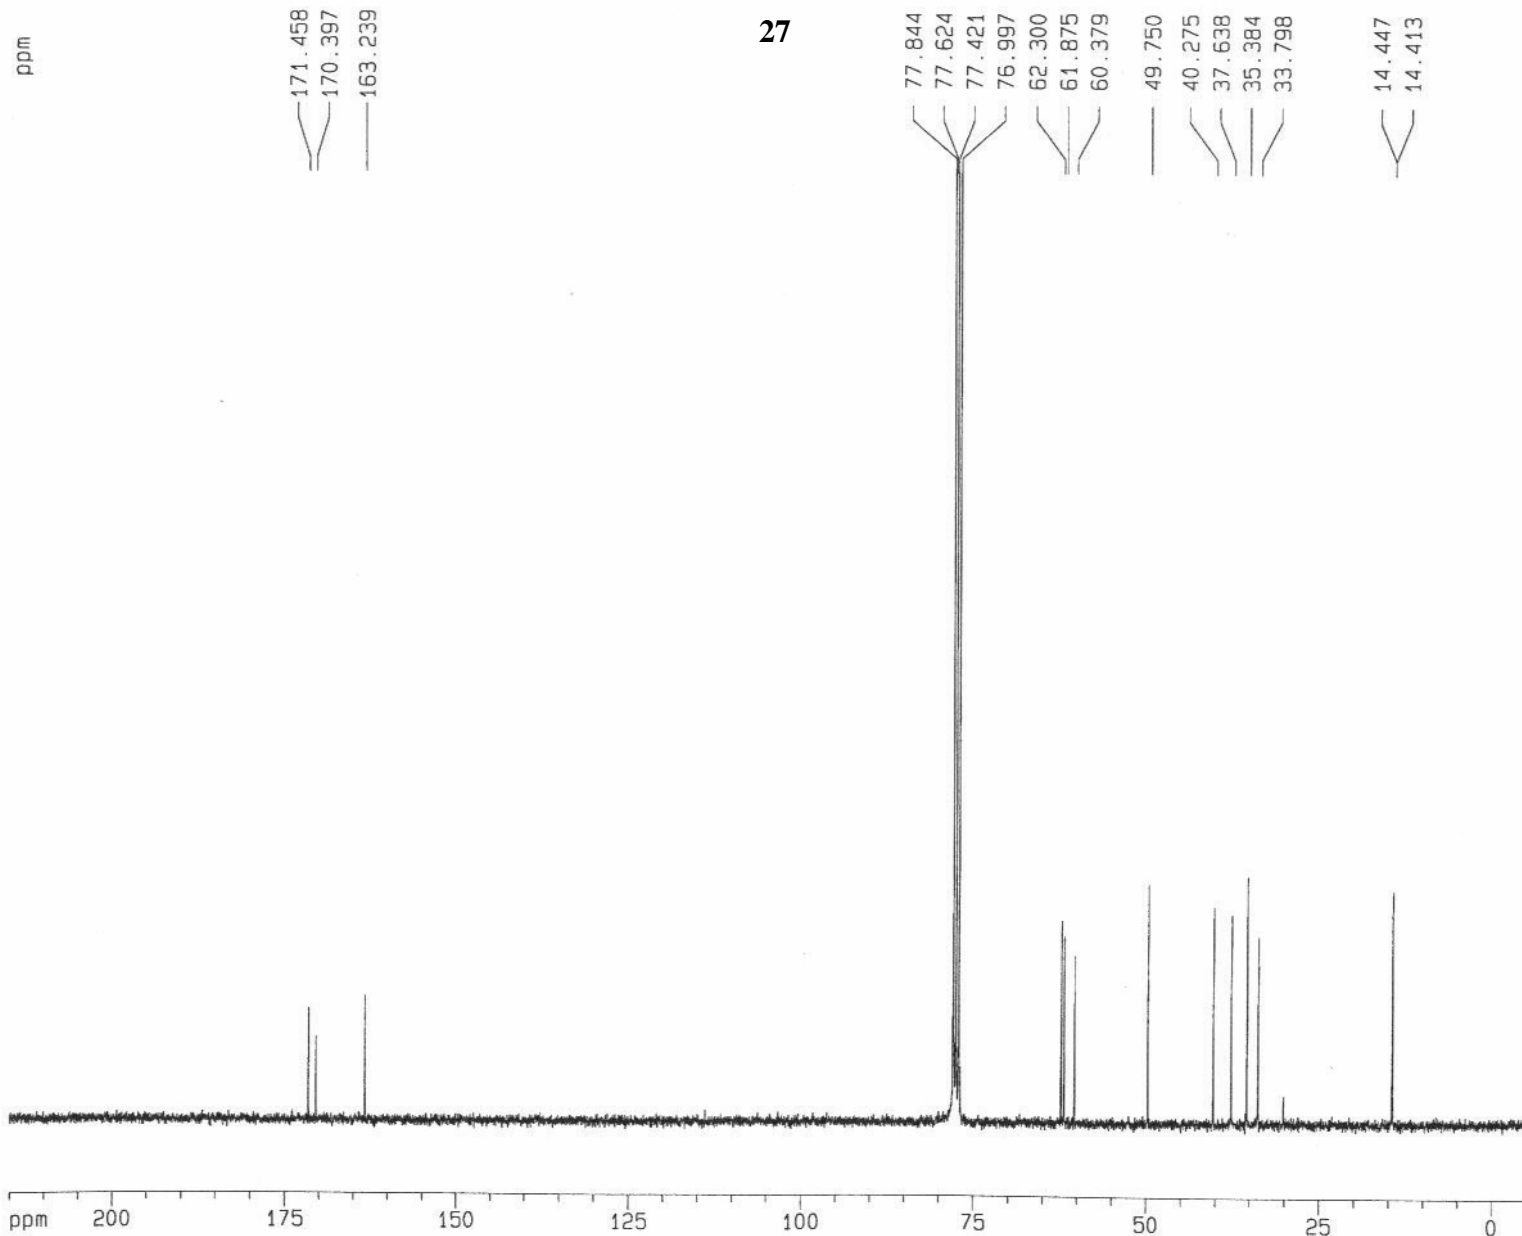

Current Data Parameters  
NAME pka-144-05-05-  
EXPNO 1  
PROCNO 1

F2 - Acquisition Parameters  
Date\_ 20070506  
Time 0.44  
INSTRUM spect  
PROBHD 5 mm Multinu  
PULPROG zgpg30  
TD 65536  
SOLVENT CDCl3  
NS 7300  
DS 4  
SWH 18832.393 Hz  
FIDRES 0.287360 Hz  
AQ 1.7400308 sec  
RG 11585.2  
DW 26.550 usec  
DE 6.00 usec  
TE 300.0 K  
D1 2.00000000 sec  
d11 0.03000000 sec  
d12 0.00002000 sec

===== CHANNEL f1 =====  
NUC1 13C  
P1 11.80 usec  
PL1 0.00 dB  
SF01 75.4760200 MHz

===== CHANNEL f2 =====  
CPDPRG2 waltz16  
NUC2 1H  
PCPD2 110.00 usec  
PL2 0.00 dB  
PL12 17.50 dB  
PL13 17.50 dB  
SF02 300.1312005 MHz

F2 - Processing parameters  
SI 32768  
SF 75.4677190 MHz  
WDW EM  
SSB 0  
LB 1.00 Hz  
GB 0  
PC 1.40

1D NMR plot parameters  
CX 20.00 cm  
F1P 215.000 ppm  
F1 16225.56 Hz  
F2P -5.000 ppm  
F2 -377.34 Hz  
PPMCM 11.00000 ppm/cm  
HZCM 830.14490 Hz/cm



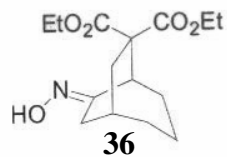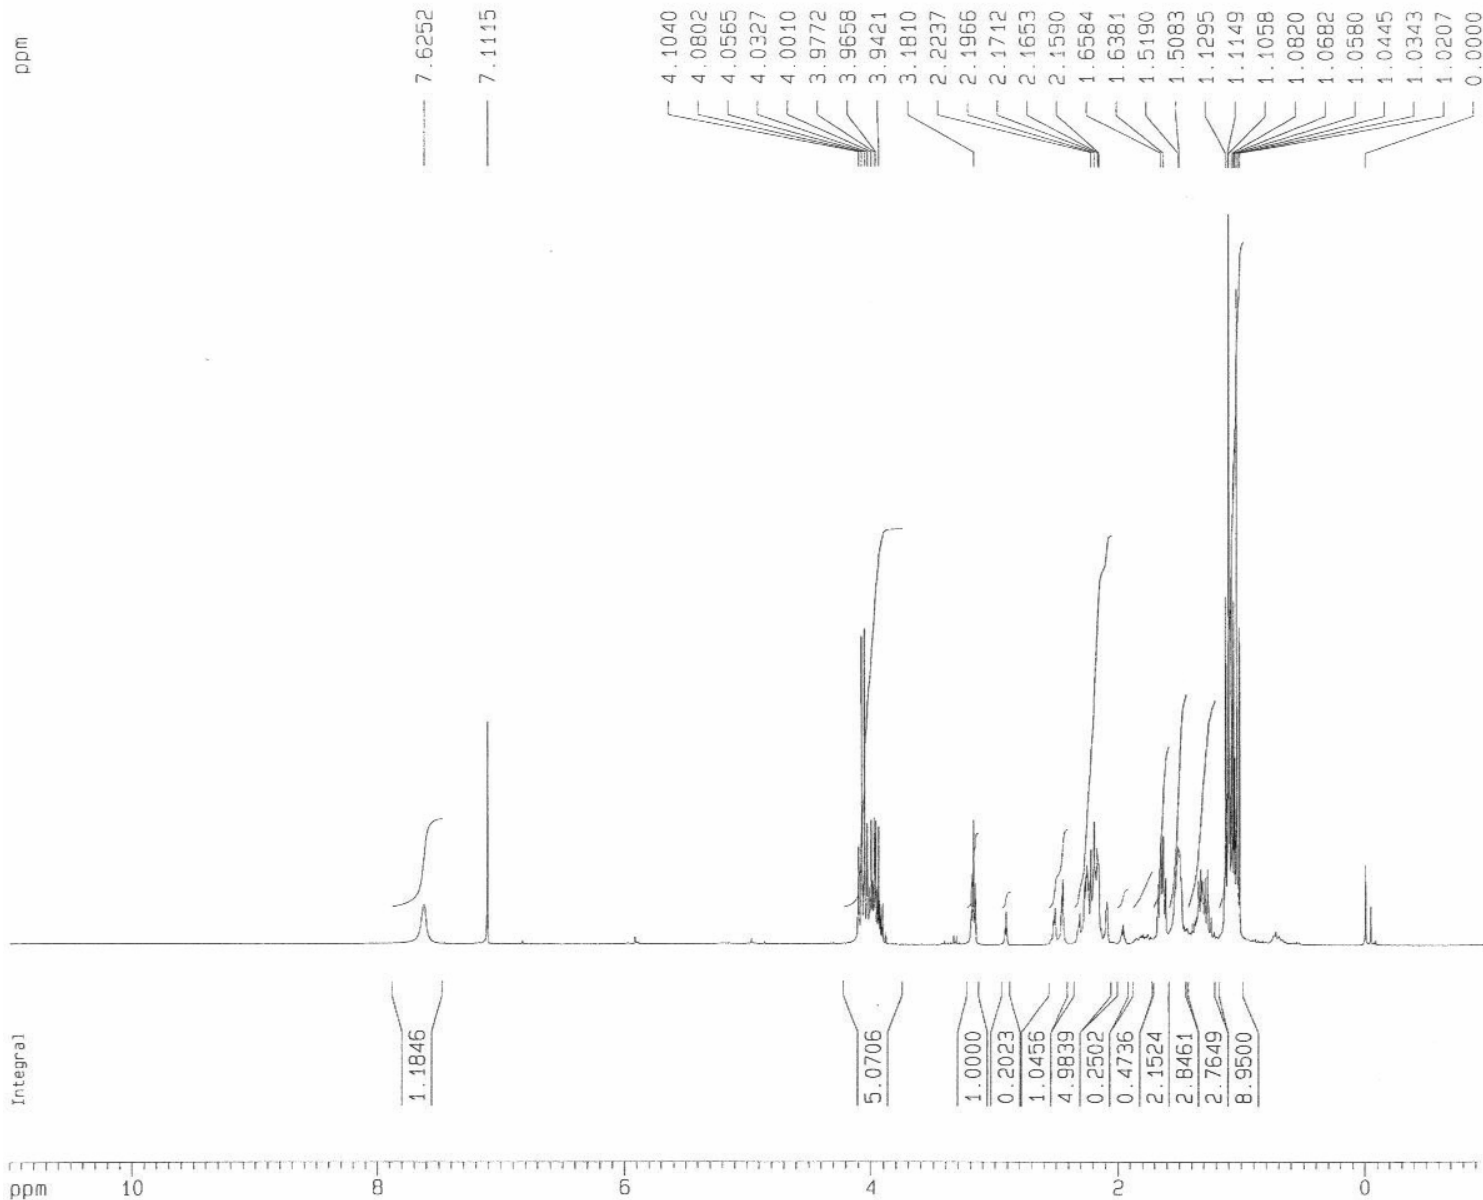

Current Data Parameters  
 NAME Nov21-2006-Wei;n  
 EXPNO 20  
 PROCNO 1

F2 - Acquisition Parameters  
 Date\_ 20061121  
 Time 23.03  
 INSTRUM spect  
 PROBHD 5 mm QNP 1H/1  
 PULPROG zg30  
 TD 65536  
 SOLVENT CDCl3  
 NS 16  
 DS 2  
 SWH 6172.839 Hz  
 FIDRES 0.094190 Hz  
 AQ 5.3084660 sec  
 RG 456.1  
 DW 81.000 usec  
 DE 6.00 usec  
 TE 300.0 K  
 D1 1.0000000 sec

==== CHANNEL f1 =====  
 NUC1 1H  
 P1 11.70 usec  
 PL1 0.00 dB  
 SFO1 299.8718518 MHz

F2 - Processing parameters  
 SI 32768  
 SF 299.8700545 MHz  
 WDW EM  
 SSB 0  
 LB 0.30 Hz  
 GB 0  
 PC 1.00

1D NMR plot parameters  
 CX 20.00 cm  
 F1P 11.000 ppm  
 F1 3298.57 Hz  
 F2P -1.000 ppm  
 F2 -299.87 Hz  
 PPMCM 0.60000 ppm/cm  
 HZCM 179.92203 Hz/cm

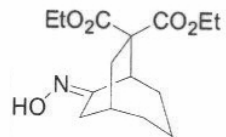

36

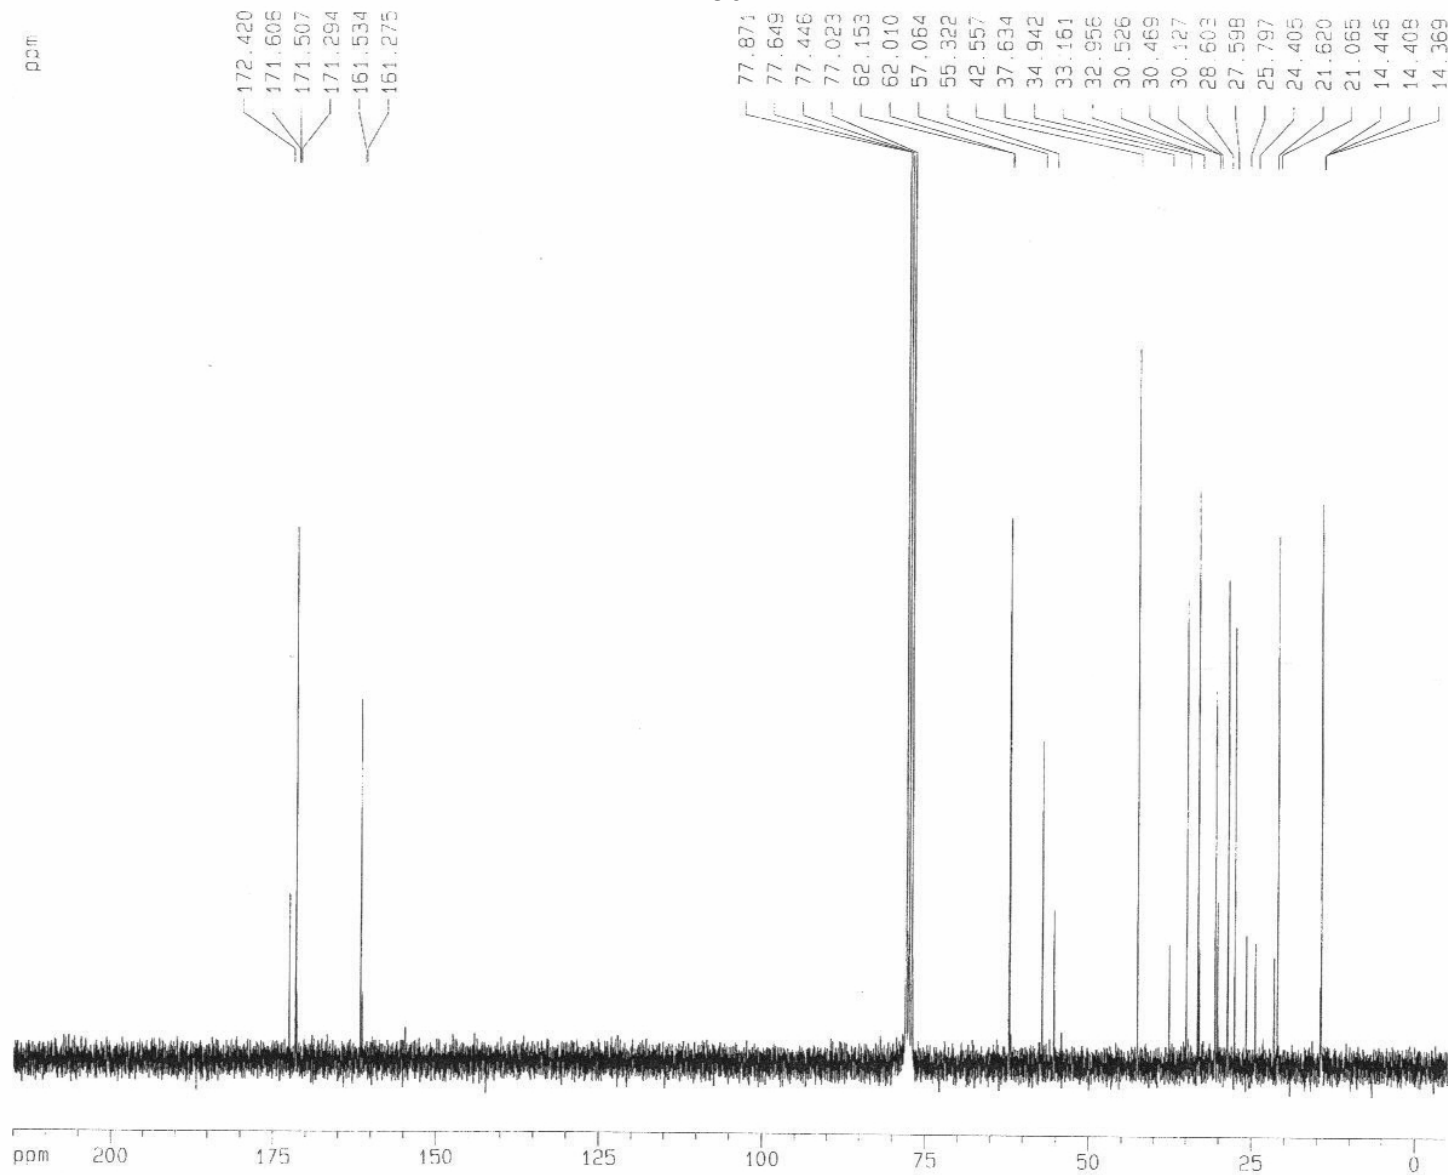

Current Data Parameters  
NAME px1\_163  
EXPNO 1  
PROCNO 1

F2 - Acquisition Parameters  
Date\_ 20061219  
Time 21.00  
INSTRUM spect  
PROBHD 5 mm QNP 1H/1  
PULPROG zgpg30  
TD 65536  
SOLVENT CDCl3  
NS 12270  
DS 4  
SWH 18796.992 Hz  
FIDRES 0.286819 Hz  
AQ 1.7433076 sec  
RG 2048  
DW 26.600 usec  
DE 6.00 usec  
TE 300.0 K  
O1 2.0000000 sec  
O11 0.0300000 sec  
O12 0.0000200 sec

----- CHANNEL f1 -----  
NUC1 13C  
P1 5.40 usec  
PL1 -6.00 dB  
SF01 75.4105357 MHz

----- CHANNEL f2 -----  
CPOPRG2 waltz16  
NUC2 1H  
PCPD2 115.00 usec  
PL2 0.00 dB  
PL12 20.00 dB  
PL13 20.00 dB  
SF02 299.8711995 MHz

F2 - Processing parameters  
SI 32768  
SF 75.4023410 MHz  
WDW no  
SSB 0  
LB 0.00 Hz  
GB 0  
PC 1.40

1D NMR plot parameters  
CX 20.00 cm  
F1P 215.000 ppm  
F1 16211.50 Hz  
F2P -5.000 ppm  
F2 -377.01 Hz  
PPMCM 11.00000 ppm/cm  
HZCM 629.42578 Hz/cm

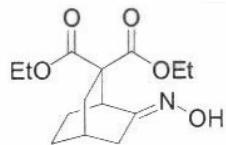

45

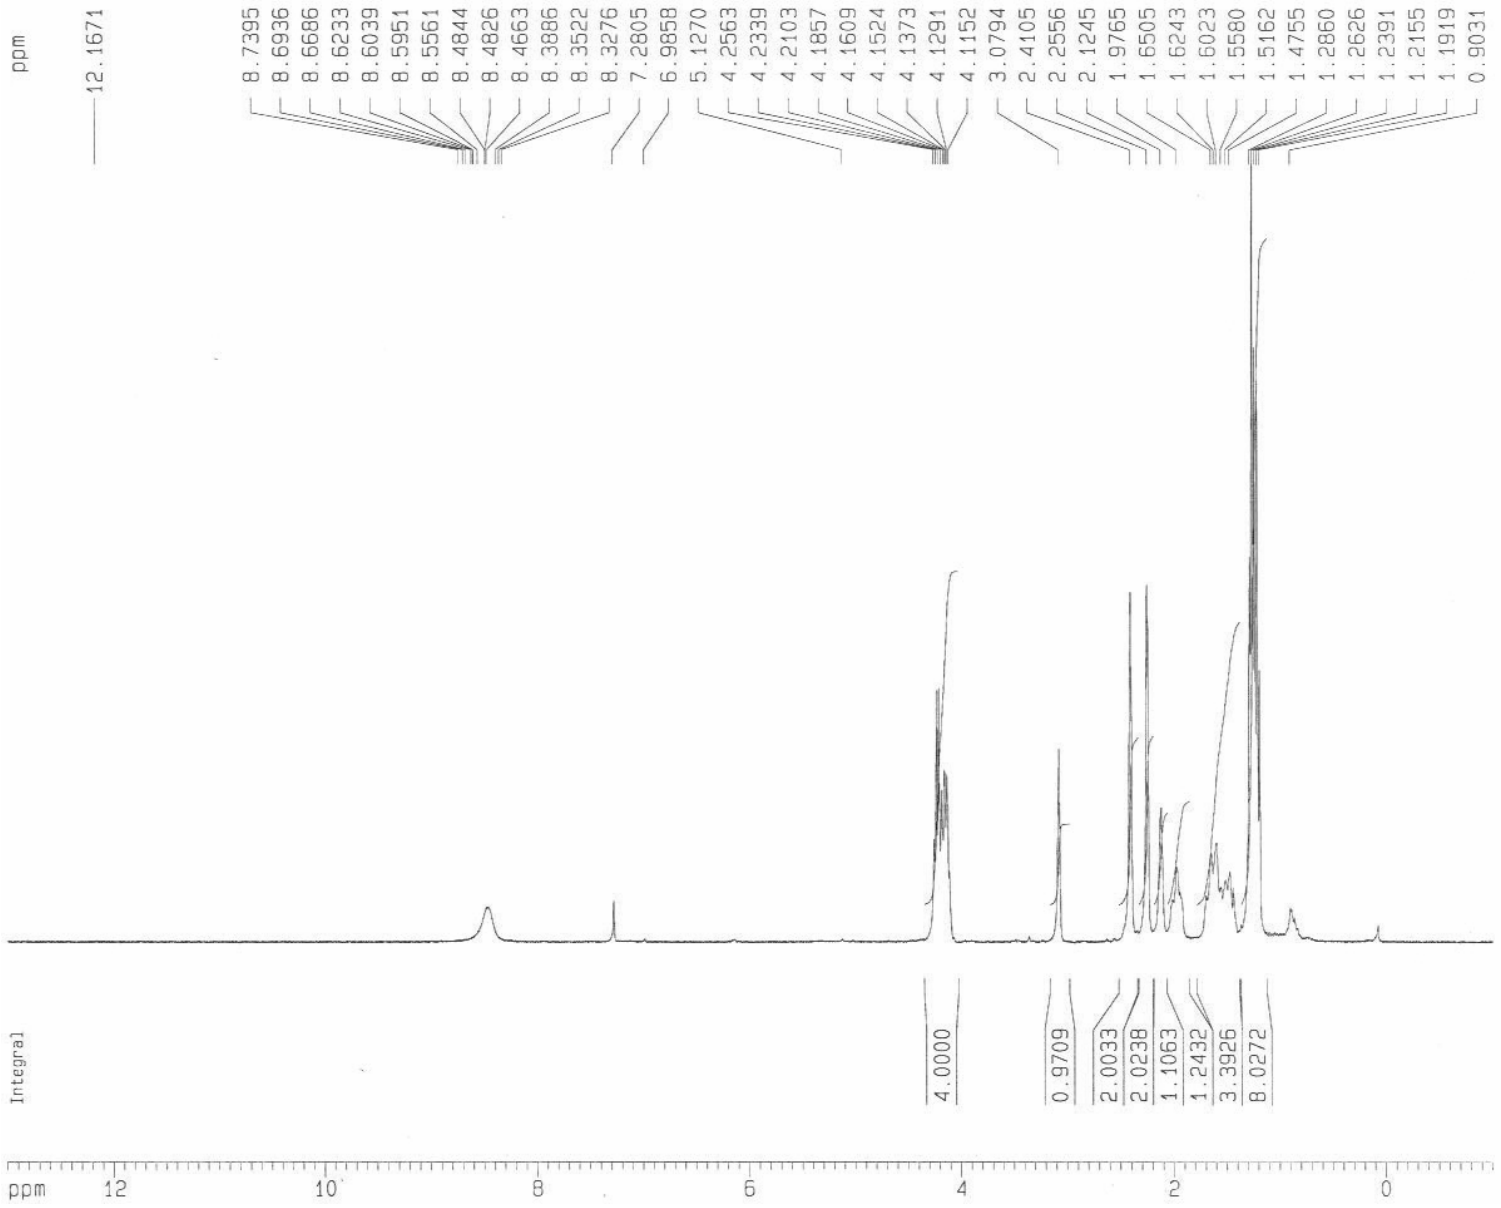

Current Data Parameters  
 NAME Nov13-2006-Wein  
 EXPNO 1  
 PROCNO 1

F2 - Acquisition Parameters  
 Date\_ 20061113  
 Time 11.02  
 INSTRUM spect  
 PROBHD 5 mm Multinu  
 PULPROG zg30  
 TD 65536  
 SOLVENT CDC13  
 NS 16  
 DS 2  
 SWH 6172.839 Hz  
 FIDRES 0.094190 Hz  
 AQ 5.3084660 sec  
 RG 228.1  
 DW 81.000 usec  
 DE 6.00 usec  
 TE 300.0 K  
 D1 1.00000000 sec

===== CHANNEL f1 =====  
 NUC1 1H  
 P1 9.60 usec  
 PL1 -6.00 dB  
 SFO1 300.1318534 MHz

F2 - Processing parameters  
 SI 32768  
 SF 300.1300000 MHz  
 WDW no  
 SSB 0  
 LB 0.00 Hz  
 GB 0  
 PC 1.00

1D NMR plot parameters  
 CX 20.00 cm  
 F1P 13.000 ppm  
 F1 3901.69 Hz  
 F2P -1.000 ppm  
 F2 -300.13 Hz  
 PPMCM 0.70000 ppm/cm

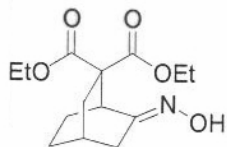

45

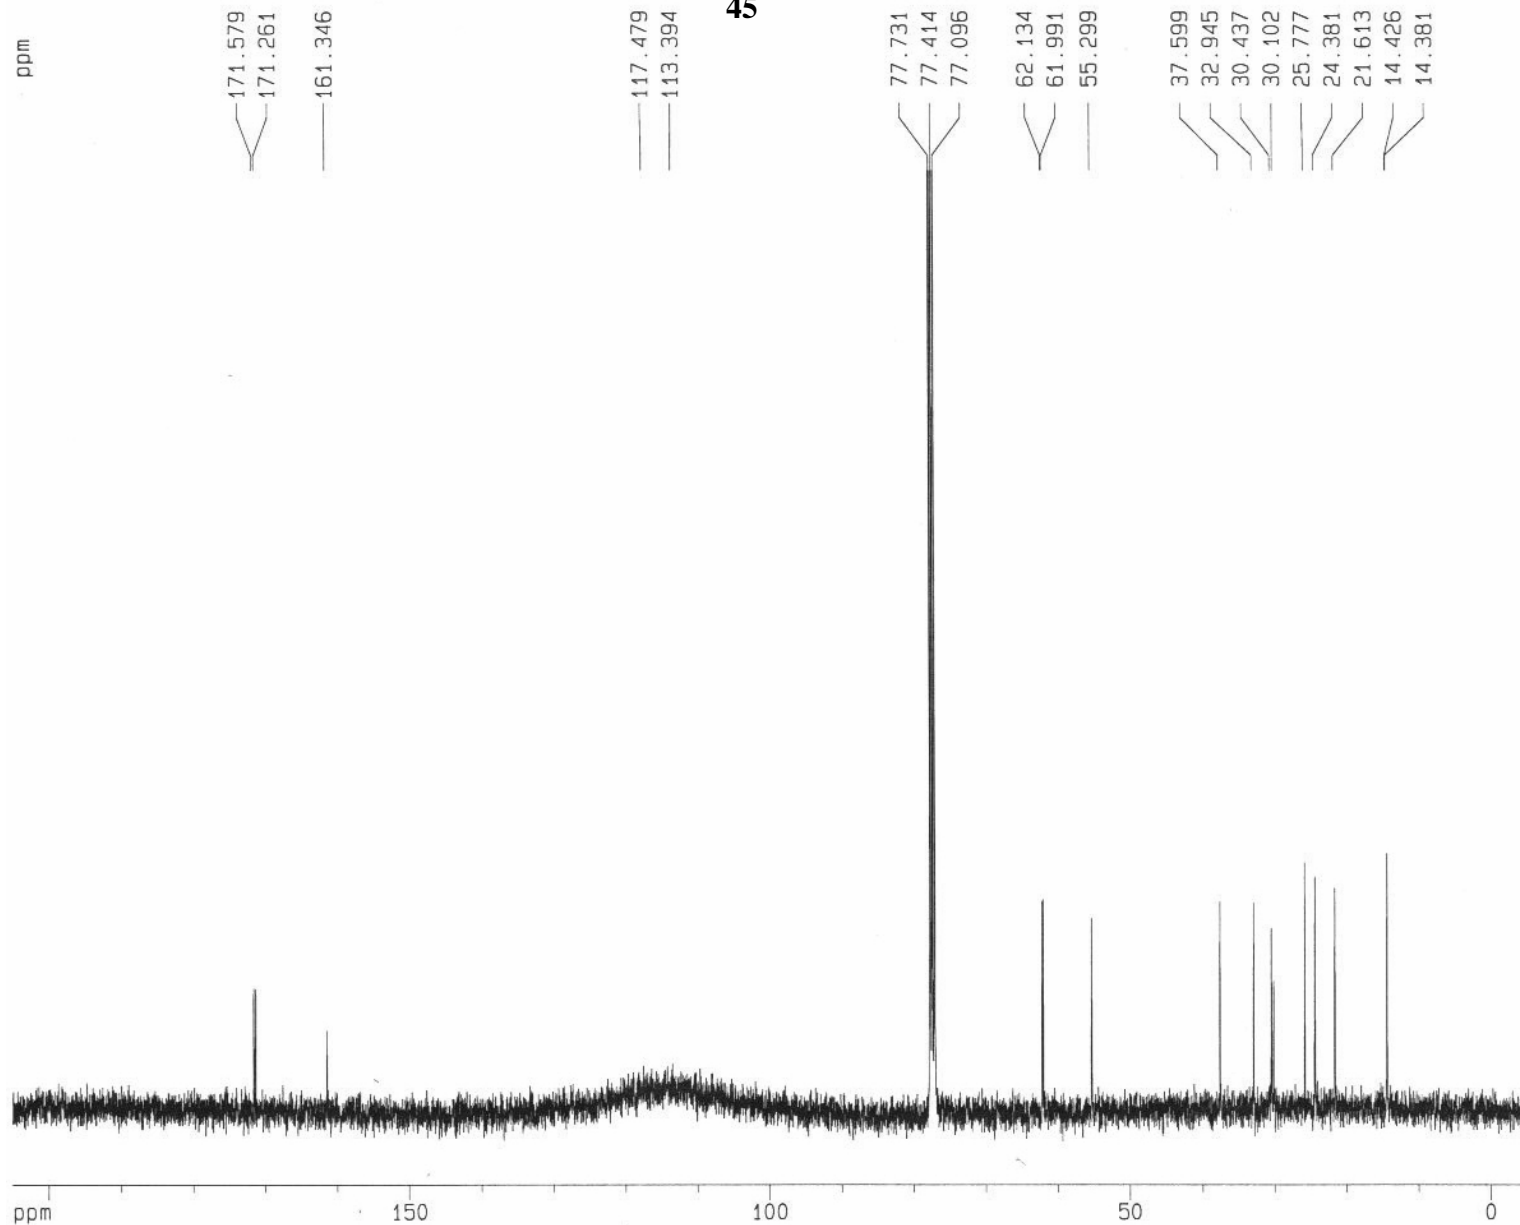

Current Data Parameters  
NAME ik09072006  
EXPNO 2  
PROCNO 1

F2 - Acquisition Parameters  
Date\_ 20060907  
Time 22.03  
INSTRUM spect  
PROBHD 5 mm BBI 1H-B  
PULPROG zgpg30  
TD 65536  
SOLVENT CDC13  
NS 7168  
DS 4  
SWH 25125.629 Hz  
FIDRES 0.383387 Hz  
AQ 1.3042164 sec  
RG 16384  
DW 19.900 usec  
DE 6.00 usec  
TE 300.0 K  
D1 2.00000000 sec  
d11 0.03000000 sec  
d12 0.00002000 sec

===== CHANNEL f1 =====  
NUC1 13C  
P1 16.35 usec  
PL1 -6.00 dB  
SFO1 100.6237959 MHz

===== CHANNEL f2 =====  
CPDPRG2 waltz16  
NUC2 1H  
PCPD2 114.00 usec  
PL2 0.00 dB  
PL12 24.00 dB  
PL13 24.00 dB  
SFO2 400.1316005 MHz

F2 - Processing parameters  
SI 32768  
SF 100.6127290 MHz  
WDW EM  
SSB 0  
LB 1.00 Hz  
GB 0  
PC 1.40

1D NMR plot parameters  
CX 20.00 cm  
F1P 205.000 ppm  
F1 20625.61 Hz  
F2P -5.000 ppm  
F2 -503.06 Hz  
PPMCM 10.50000 ppm/cm  
HZCM 1056.43372 Hz/cm

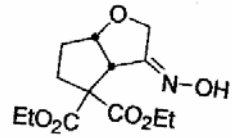

54

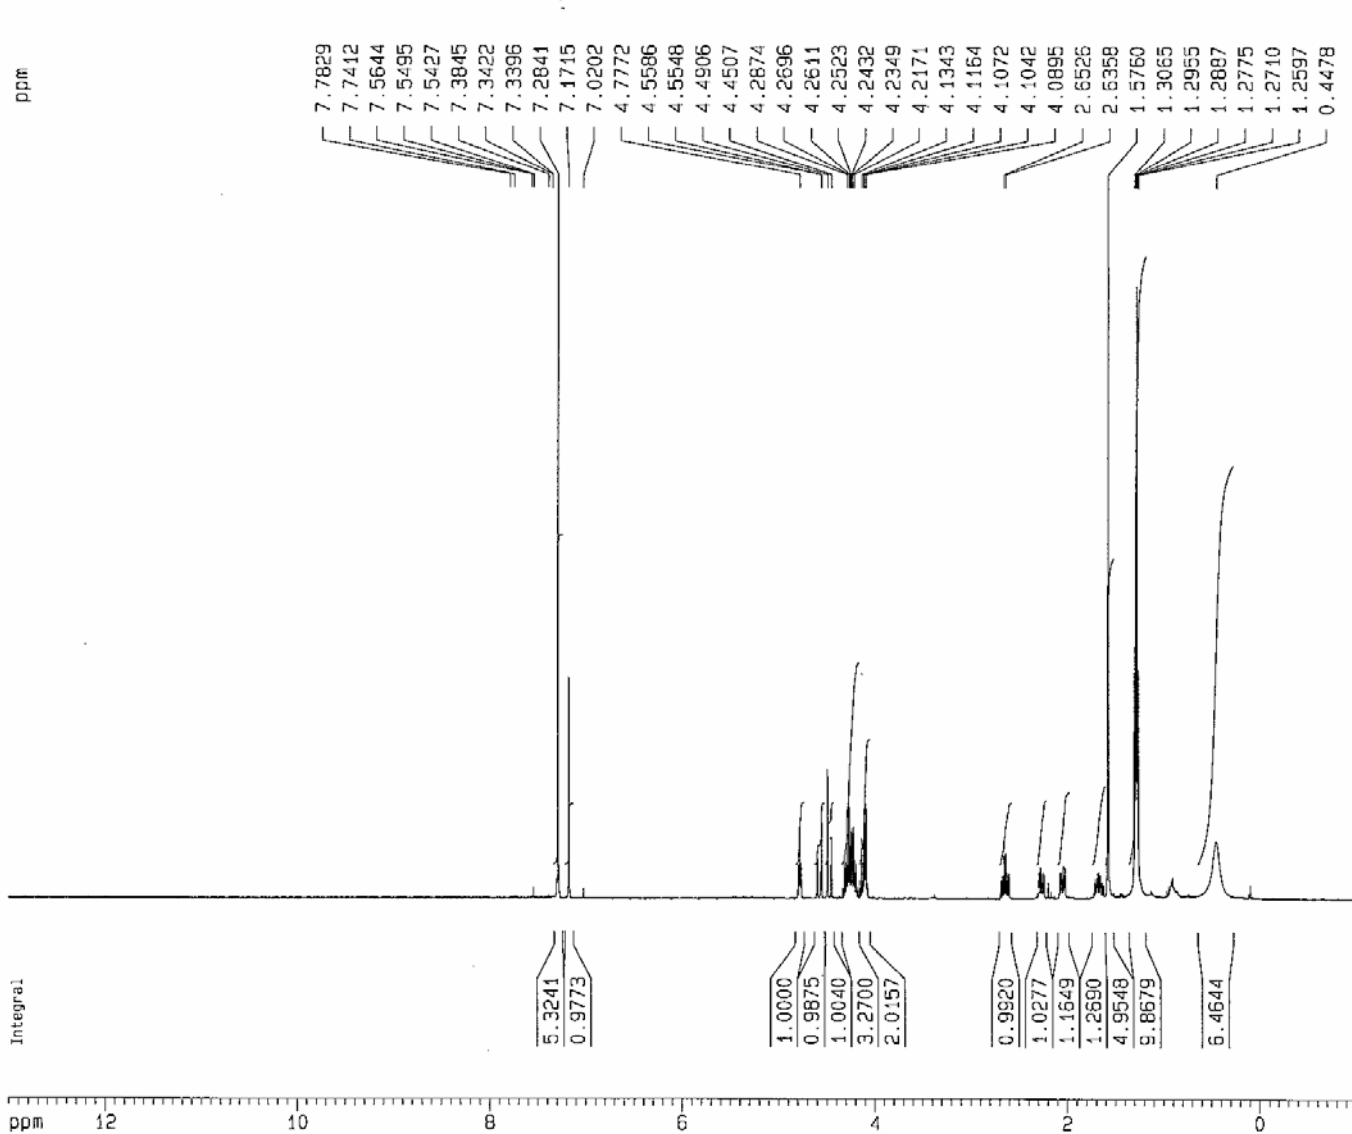

Current Data Parameters  
 NAME ik3-295-may5-0  
 EXPNO 2  
 PROCNO 1

F2 - Acquisition Parameters  
 Date\_ 20070501  
 Time 13.32  
 INSTRUM spect  
 PROBHD 5 mm BBI 1H-B  
 PULPROG zg30  
 TD 65536  
 SOLVENT CDCl3  
 NS 512  
 DS 2  
 SWH 8278.146 Hz  
 FIDRES 0.126314 Hz  
 AQ 3.9584243 sec  
 RG 3549.1  
 DW 50.400 usec  
 DE 6.00 usec  
 TE 300.0 K  
 D1 1.00000000 sec

===== CHANNEL f1 =====  
 NUC1 1H  
 P1 6.45 usec  
 PL1 0.00 dB  
 SF01 400.1324710 MHz

F2 - Processing parameters  
 SI 32768  
 SF 400.1300000 MHz  
 WDW no  
 SSB 0  
 LB 0.00 Hz  
 GB 0  
 PC 1.00

1D NMR plot parameters  
 CX 20.00 cm  
 F1P 13.000 ppm  
 F1 5201.69 Hz  
 F2P -1.000 ppm  
 F2 -400.13 Hz  
 PPMCM 0.70000 ppm/cm  
 HZCM 280.09100 Hz/cm

ppm

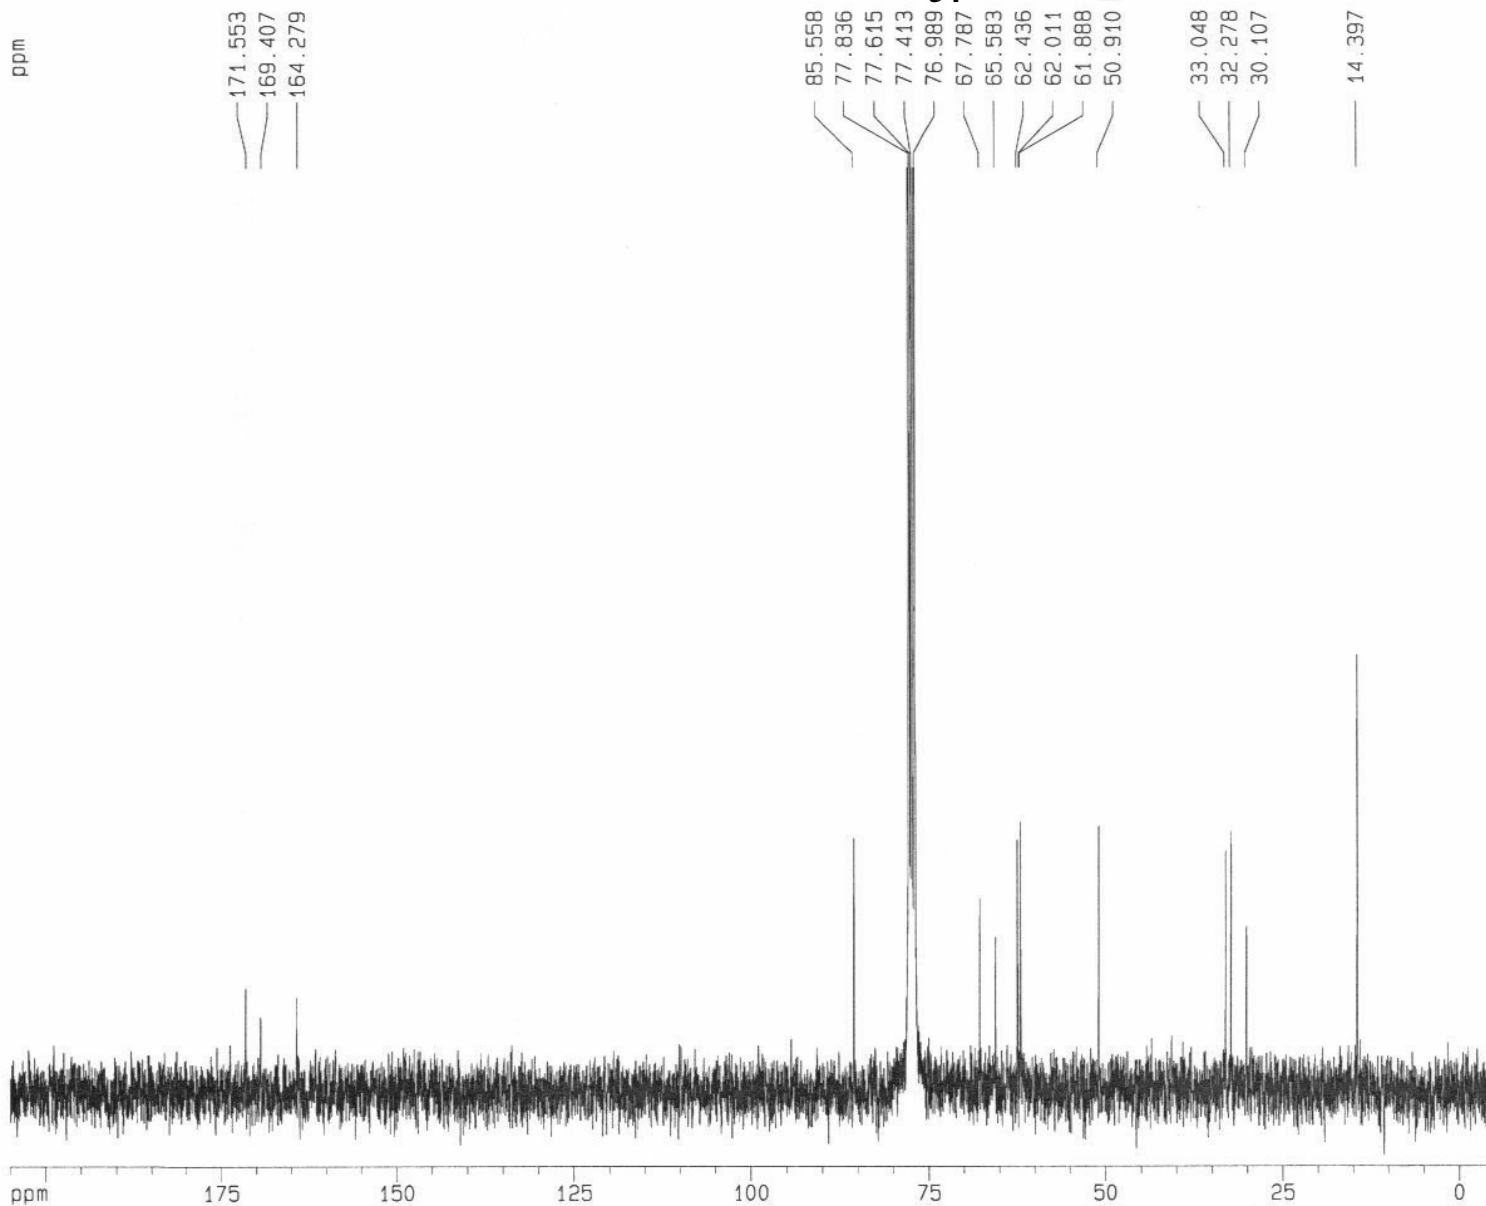

Current Data Parameters  
 NAME ik3-289overnig  
 EXPNO 1  
 PROCNO 1

F2 - Acquisition Parameters  
 Date\_ 20070605  
 Time 9.11  
 INSTRUM spect  
 PROBHD 5 mm Multinu  
 PULPROG zgpg30  
 TD 65536  
 SOLVENT CDCl3  
 NS 10240  
 DS 4  
 SWH 18832.393 Hz  
 FIDRES 0.287360 Hz  
 AQ 1.7400308 sec  
 RG 13004  
 DW 26.550 usec  
 DE 6.00 usec  
 TE 300.0 K  
 D1 2.0000000 sec  
 d11 0.0300000 sec  
 d12 0.00002000 sec

===== CHANNEL f1 =====  
 NUC1 13C  
 P1 11.80 usec  
 PL1 0.00 dB  
 SF01 75.4760200 MHz

===== CHANNEL f2 =====  
 CPDPRG2 waltz16  
 NUC2 1H  
 PCPD2 110.00 usec  
 PL2 0.00 dB  
 PL12 17.50 dB  
 PL13 17.50 dB  
 SF02 300.1312005 MHz

F2 - Processing parameters  
 SI 32768  
 SF 75.4677190 MHz  
 WDW EM  
 SSB 0  
 LB 1.00 Hz  
 GB 0  
 PC 1.40

1D NMR plot parameters  
 CX 20.00 cm  
 F1P 205.000 ppm  
 F1 15470.88 Hz  
 F2P -5.000 ppm  
 F2 -377.34 Hz  
 PPMCM 10.50000 ppm/cm  
 HZCM 792.41107 Hz/cm

S62

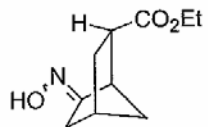

12/13

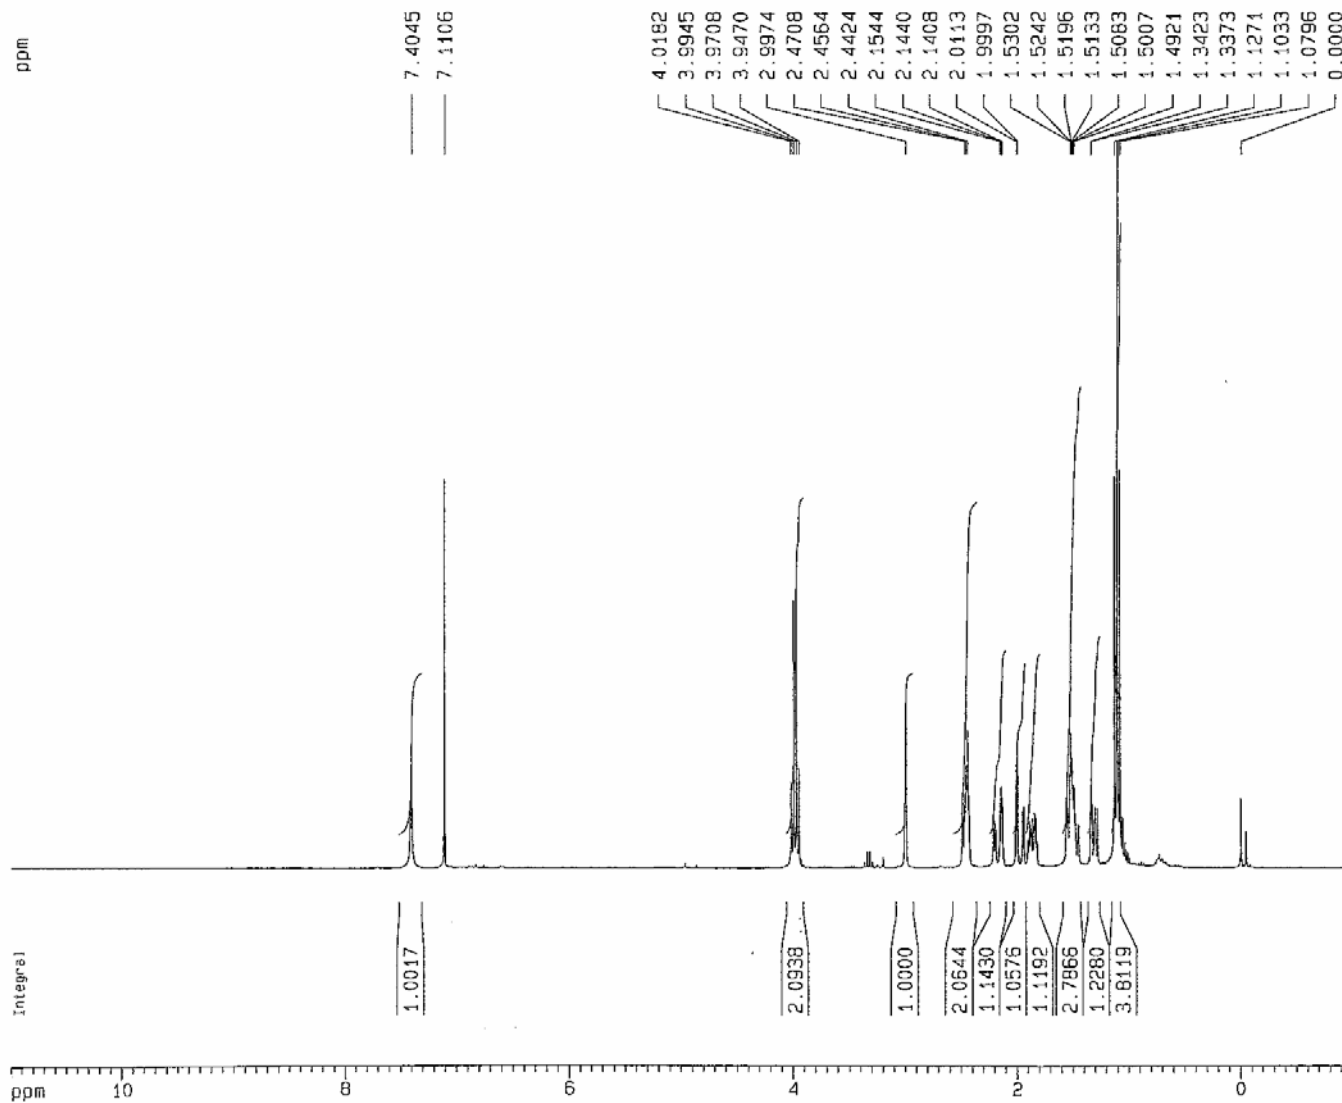

Current Data Parameters  
 NAME May29-2007-Wein  
 EXPNO 90  
 PROCNO 1

F2 - Acquisition Parameters  
 Date\_ 20070529  
 Time 20.11  
 INSTRUM spect  
 PROBHD 5 mm QNP 1H/1  
 PULPROG zg30  
 TD 65536  
 SOLVENT CDCl3  
 NS 128  
 DS 0  
 SWH 6172.839 Hz  
 FIDRES 0.094190 Hz  
 AQ 5.3084660 sec  
 RG 574.7  
 DW 81.000 usec  
 DE 5.00 usec  
 TE 300.0 K  
 O1 2.0000000 sec

----- CHANNEL f1 -----  
 NUC1 1H  
 P1 11.70 usec  
 PL1 0.00 dB  
 SFO1 299.8718518 MHz

F2 - Processing parameters  
 SI 32768  
 SF 299.8700547 MHz  
 WDW EM  
 SSB 0  
 LB 0.30 Hz  
 GB 0  
 PC 1.00

1D NMR plot parameters  
 CX 20.00 cm  
 F1P 11.000 ppm  
 F1 3298.57 Hz  
 F2P -1.000 ppm  
 F2 -299.87 Hz  
 PPMCM 0.60000 ppm/cm  
 HZCM 179.92203 Hz/cm

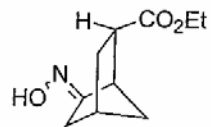

12/13

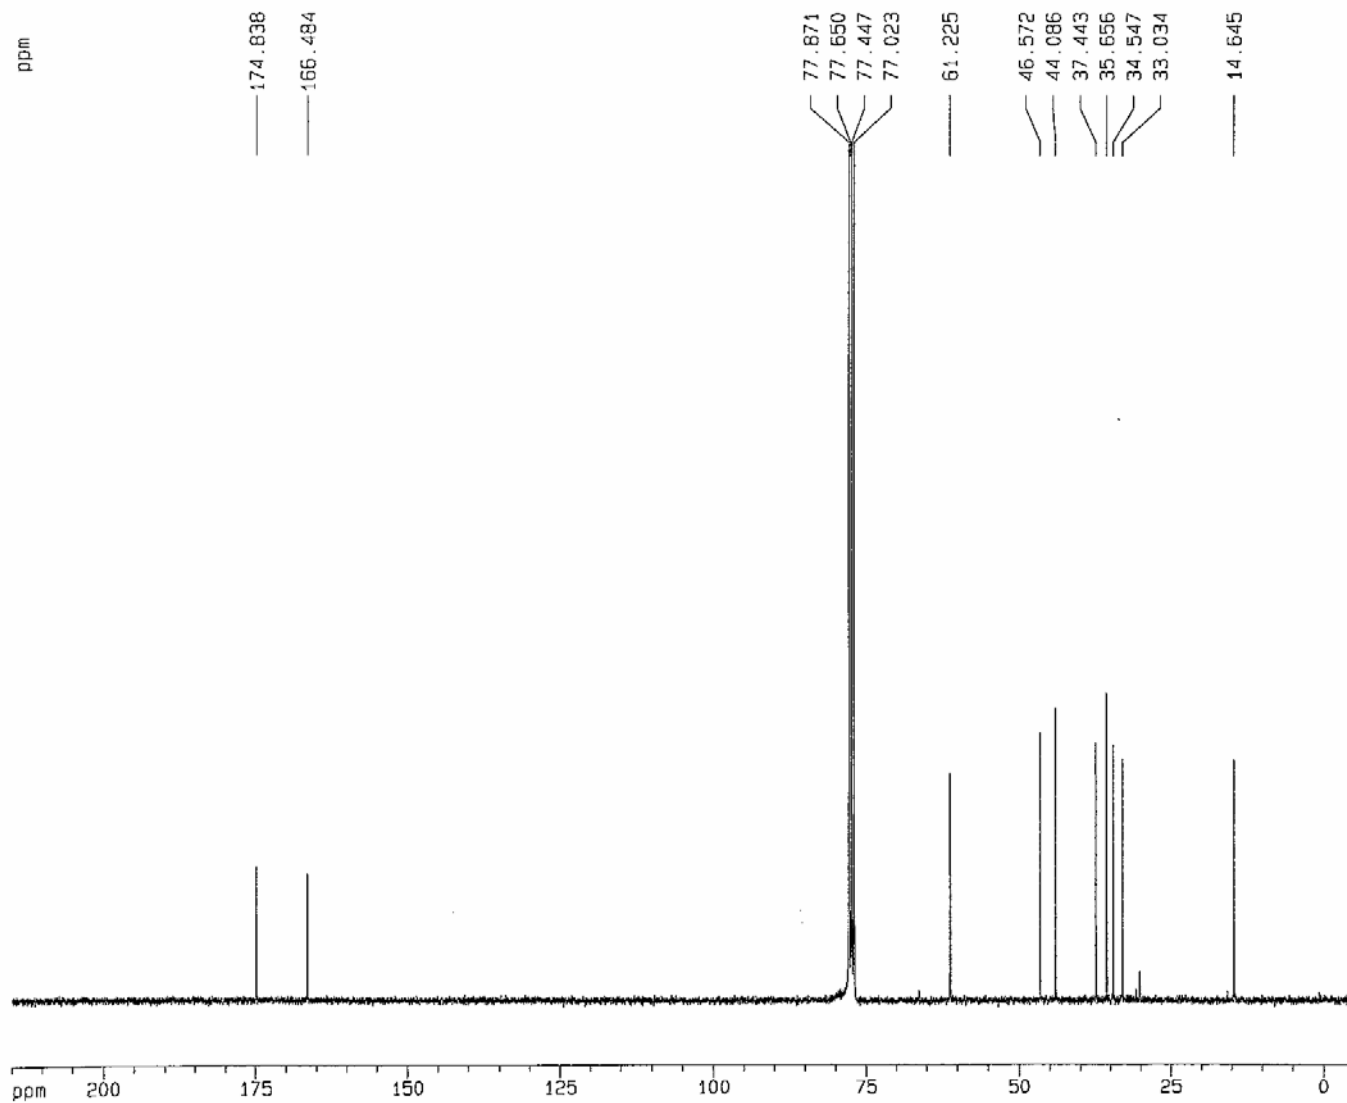

Current Data Parameters  
 NAME May29-2007-Wein  
 EXPNO 92  
 PROCNO 1

F2 - Acquisition Parameters  
 Date\_ 20070529  
 Time 20.49  
 INSTRUM spect  
 PROBHD 5 mm QNP 1H/1  
 PULPROG zgpg30  
 TD 65536  
 SOLVENT CDCl3  
 NS 11641  
 DS 4  
 SWH 18796.992 Hz  
 FIDRES 0.286819 Hz  
 AQ 1.7433076 sec  
 RG 2048  
 DW 26.600 usec  
 DE 6.00 usec  
 TE 300.0 K  
 D1 2.00000000 sec  
 D11 0.03000000 sec  
 D12 0.00002000 sec

===== CHANNEL f1 =====  
 NUC1 13C  
 P1 5.40 usec  
 PL1 -6.00 dB  
 SF01 75.4106357 MHz

===== CHANNEL f2 =====  
 CPDPRG2 waltz16  
 NUC2 1H  
 PCPD2 115.00 usec  
 PL2 0.00 dB  
 PL12 20.00 dB  
 PL13 20.00 dB  
 SF02 299.8711995 MHz

F2 - Processing parameters  
 SI 32768  
 SF 75.4023410 MHz  
 WDW EM  
 SSB 0  
 LB 1.00 Hz  
 GB 0  
 PC 1.40

1D NMR plot parameters  
 CX 20.00 cm  
 F1P 215.000 ppm  
 F1 16211.50 Hz  
 F2P -5.000 ppm  
 F2 -377.01 Hz  
 PPMCM 11.00000 ppm/cm  
 HZCM 829.42578 Hz/cm



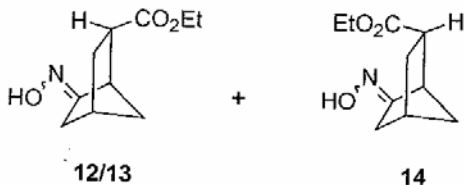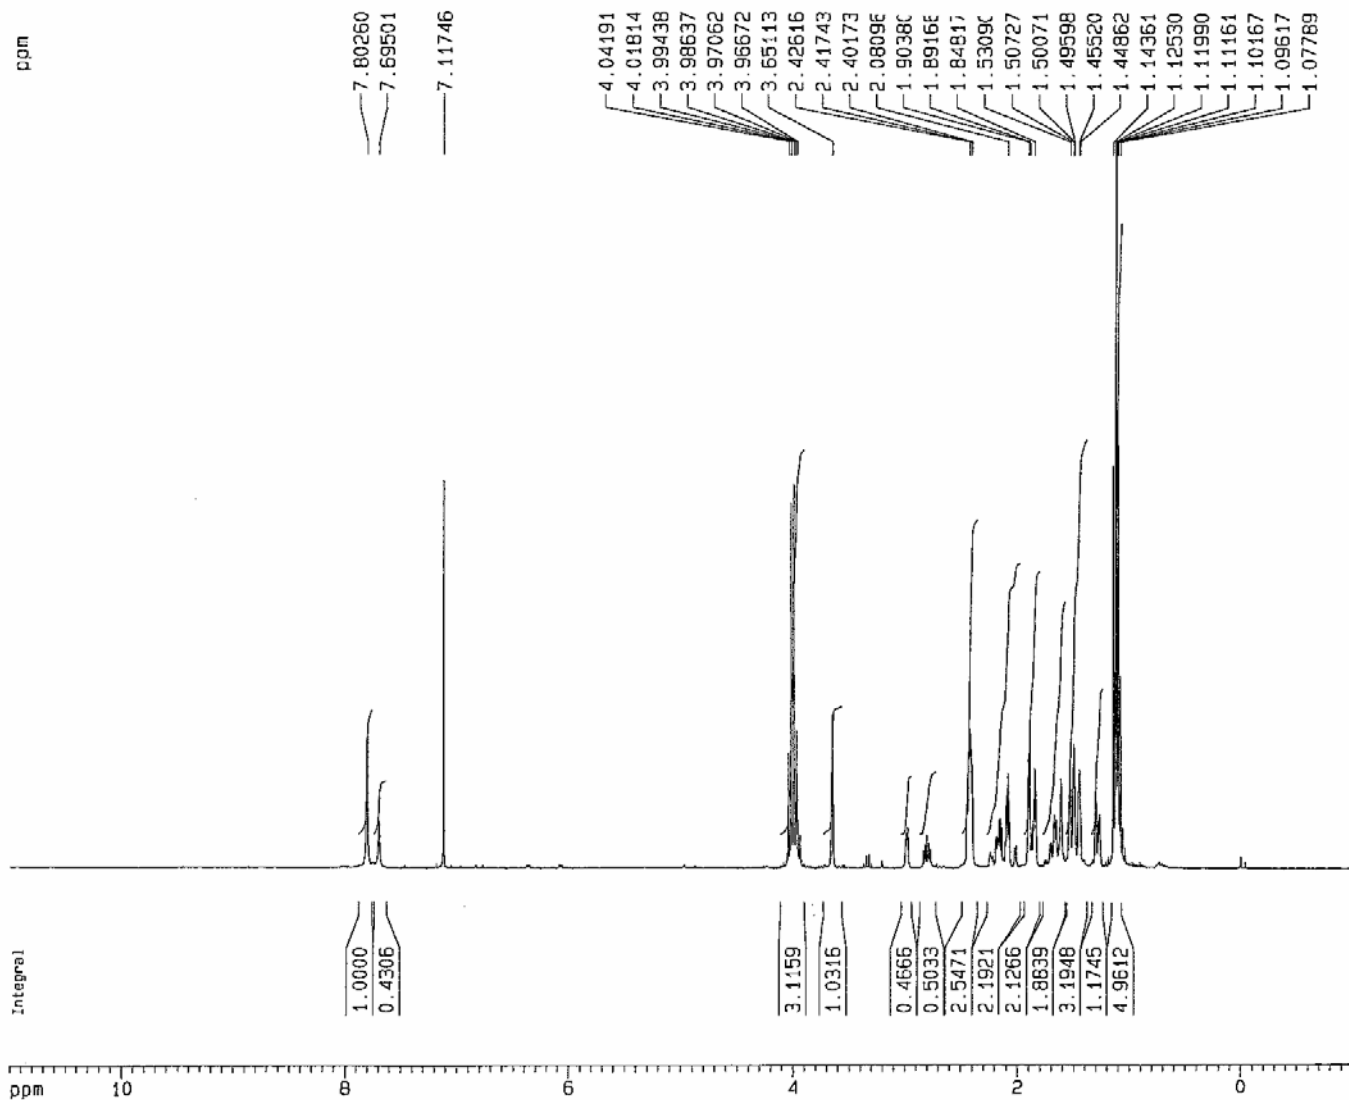

Current Data Parameters  
 NAME May30-2007-Wein  
 EXPNO 10  
 PROCNO 1

F2 - Acquisition Parameters  
 Date\_ 20070530  
 Time 18.25  
 INSTRUM spect  
 PROBHD 5 mm Multinu  
 PULPROG zg30  
 TD 65536  
 SOLVENT CDCl3  
 NS 16  
 DS 2  
 SWH 6172.839 Hz  
 FIDRES 0.094190 Hz  
 AQ 5.3084660 sec  
 RG 456.1  
 DW 81.000 usec  
 DE 6.00 usec  
 TE 300.0 K  
 D1 1.00000000 sec

----- CHANNEL f1 -----  
 NUC1 1H  
 P1 9.60 usec  
 PL1 -6.00 dB  
 SFO1 300.1318534 MHz

F2 - Processing parameters  
 SI 32768  
 SF 300.1300492 MHz  
 WDW EM  
 SSB 0  
 LB 0.30 Hz  
 GB 0  
 PC 1.00

1D NMR plot parameters  
 CX 20.00 cm  
 F1P 11.000 ppm  
 F1 3301.43 Hz  
 F2P -1.000 ppm  
 F2 -300.13 Hz  
 PPHCM 0.60000 ppm/cm  
 HZCM 180.07802 Hz/cm

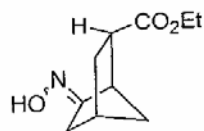

12/13

+

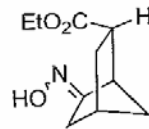

14

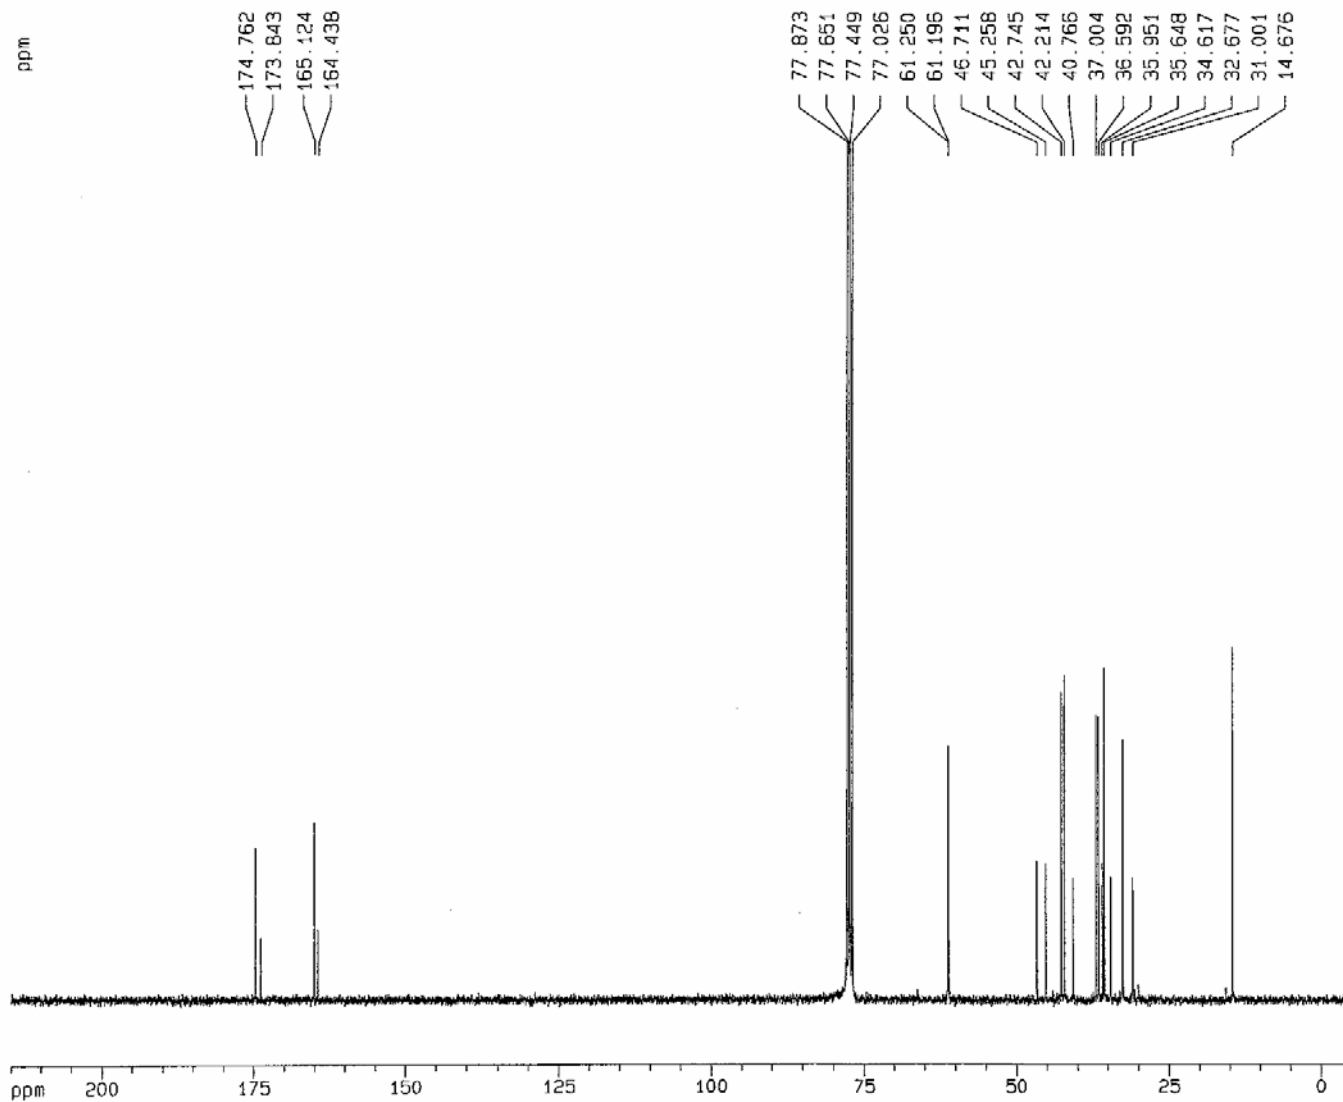

Current Data Parameters  
NAME May30-2007-Wein  
EXPNO 10  
PROCNO 1

F2 - Acquisition Parameters  
Date\_ 20070531  
Time 0.34  
INSTRUM spect  
PROBHD 5 mm QNP 1H/1  
PULPROG zgpg30  
TD 65536  
SOLVENT CDCl3  
NS 9075  
DS 4  
SWH 18796.992 Hz  
FIDRES 0.285819 Hz  
AQ 1.7433076 sec  
RG 512  
DW 26.500 usec  
DE 6.00 usec  
TE 300.0 K  
D1 2.0000000 sec  
D11 0.0300000 sec  
D12 0.0000200 sec

----- CHANNEL f1 -----  
NUC1 13C  
P1 5.40 usec  
PL1 -6.00 dB  
SF01 75.4106357 MHz

----- CHANNEL f2 -----  
CPDPRG2 waltz16  
NUC2 1H  
PCPD2 115.00 usec  
PL2 0.00 dB  
PL12 20.00 dB  
PL13 20.00 dB  
SF02 299.8711995 MHz

F2 - Processing parameters  
SI 32768  
SF 75.4023410 MHz  
WDW EM  
SSB 0  
LB 1.00 Hz  
GB 0  
PC 1.40

10 NMR plot parameters  
CX 20.00 cm  
F1P 215.000 ppm  
F1 16211.50 Hz  
F2P -5.000 ppm  
F2 -377.01 Hz  
PPMCH 11.00000 ppm/cm  
HZCM 829.42578 Hz/cm
